# Supplementary material for: Inhibitor of ppGalNAc-T3-mediated O-glycosylation blocks cancer cell invasiveness and lowers FGF23 levels
Source: eLife. 2017 Mar 31;6:e24051. doi: 10.7554/eLife.24051 (PMC5407854; doi:10.7554/eLife.24051)
Supplement: Figure 1—figure supplement 1—source data 1. — DOI: http://dx.doi.org/10.7554/eLife.24051.007 [file elife-24051-fig1-figsupp1-data1.xlsx]

## Sheet: Figure 1-Supplement 1-Source Da
	24h						48h						72h
Concentration (µM)	Repeat 1	Repeat 2	Repeat 3	Average	SD	SEM	Repeat 1	Repeat 2	Repeat 3	Average	SD	SEM	Repeat 1	Repeat 2	Repeat 3	Average	SD	SEM
0	0.581633	0.620561	0.31016	0.504118	0.169096	0.0976305	0.887755	0.874766	0.529412	0.763978	0.203244	0.117346	1	1	1	1	0	0
1	0.533163	0.62243	0.31016	0.488585	0.160837	0.0928619	0.862245	0.792523	0.441176	0.698648	0.225686	0.130304	1.02041	0.897196	0.679144	0.865583	0.172814	0.0997773
5	0.586735	0.590654	0.302139	0.493176	0.165454	0.095528	0.913265	0.826168	0.516043	0.751825	0.208786	0.120546	1.28571	1.13084	0.663102	1.02655	0.324143	0.18715
10	0.568878	0.603738	0.275401	0.482672	0.180346	0.104126	0.887755	0.785047	0.449198	0.707333	0.229374	0.132433	1.11224	0.979439	0.716578	0.936087	0.201365	0.116261
25	0.545918	0.614953	0.326203	0.495692	0.150785	0.0870585	0.862245	0.676636	0.430481	0.656454	0.216588	0.125051	1.14286	1.00374	0.647059	0.931218	0.255731	0.147651
