# Supplementary material for: Inhibitor of ppGalNAc-T3-mediated O-glycosylation blocks cancer cell invasiveness and lowers FGF23 levels
Source: eLife. 2017 Mar 31;6:e24051. doi: 10.7554/eLife.24051 (PMC5407854; doi:10.7554/eLife.24051)
Supplement: Figure 1—figure supplement 2—source data 1. — DOI: http://dx.doi.org/10.7554/eLife.24051.009 [file elife-24051-fig1-figsupp2-data1.xlsx]

## Sheet: ConA
Fig1-Fig supplement 2A
T3Inh-1	Lectin	510	512	514	516	518	520	522	524	526	528	530	532	534	536	538	540	542	544	546	548	550
0 µM	Ø	4028	2677	2077	1536	1498	1106	1191	1225	1088	1016	734	1087	1288	1178	1007	1026	1269	573	908	1212	920
10 µM	Ø	5497	2742	2156	1616	1575	1783	1373	1375	1189	1639	676	1428	937	1259	1411	965	1196	1203	1021	1231	1351
20 µM	Ø	4921	2842	1881	2403	1355	1183	1424	2251	988	889	2095	1177	1135	1182	1487	904	1127	835	1118	1557	1172
0 µM	ConA	30677	32659	32850	35323	35335	34401	34097	32862	31438	30795	28591	26559	24834	21909	21417	19295	19153	15431	16380	14698	15565
10 µM	ConA	28974	29547	31273	31312	32453	32104	29515	30716	30030	26955	26208	22305	22116	20818	20720	16956	16806	17161	14663	13273	14354
20 µM	ConA	29658	28463	29501	31131	29305	30315	28272	27958	26023	25320	24774	22015	20818	21299	19297	17593	15271	14922	13271	13998	12455
Fig1-Fig supplement 2B (normalized 520nm)
	0 µM	10 µM	20 µM
Repeat 1	1	0.926023	0.847697
Repeat 2	1	1.18013	1.41636
Repeat 3	1	0.910677	0.874966
Average	1	1.00561	1.04634
SD	0	0.151333	0.320738
SEM	0	0.0873749	0.185184

## Sheet: WGA
Fig1-Fig supplement 2C
T3Inh-1	Lectin	510	512	514	516	518	520	522	524	526	528	530	532	534	536	538	540	542	544	546	548	550
0 µM	Ø	3828	2634	2503	2708	1399	1155	1186	980	1656	1382	796	834	1256	1029	967	846	710	682	1196	1022	527
10 µM	Ø	5112	2340	2138	2425	1174	1270	1263	789	1388	1219	1344	1362	1183	901	873	1075	1322	1087	1327	739	562
20 µM	Ø	5416	2642	2268	1756	1955	1442	1678	1239	1025	1250	1443	1014	958	726	1243	1271	900	1014	572	1046	1486
0 µM	WGA	14256	15200	14162	14294	13311	13987	13756	12045	12580	11892	10591	10156	10029	8588	8094	8301	8556	6535	7100	6464	6255
10 µM	WGA	16741	15338	13449	14799	14836	13948	13905	13587	13405	12799	11339	11156	11184	8709	8921	8049	8112	7719	7122	6603	6372
20 µM	WGA	15748	14292	14764	14714	14857	13827	14810	13374	12425	13139	12113	10630	10995	9433	9273	7876	8053	7104	7608	7864	6726
Fig1-Fig supplement 2D
T3Inh-1	0 µM	10 µM	25 µM
Repeat 1	1	0.950245	0.717129
Repeat 2	1	0.987999	0.965165
Repeat 3	0.996484	0.879883	0.895068
Average	0.998828	0.939376	0.859121
SD	0.00202975	0.0548715	0.127866
SEM	0.00117191	0.031681	0.0738256

## Sheet: SNA
Fig1-Fig supplement 2E
T3Inh-1	Lectin	510	512	514	516	518	520	522	524	526	528	530	532	534	536	538	540	542	544	546	548	550
0 µM	Ø	2296	2037	1537	1336	1495	1023	1113	968	932	1174	1116	1124	1319	883	937	1113	909	703	1116	789	1151
10 µM	Ø	3029	1787	1371	945	1222	1586	1060	943	858	1048	1038	774	675	1136	917	753	699	933	1422	743	1034
20 µM	Ø	3133	1575	1389	1201	1287	1391	858	967	1275	841	869	1096	1373	1163	891	1249	1338	651	1089	993	972
0 µM	SNA	17126	15506	14899	14315	14765	15783	13818	12427	12461	13595	12360	11277	10362	9212	8894	8858	8211	7076	6451	7413	7222
10 µM	SNA	16459	16772	16397	17429	17721	18768	17611	17529	14979	13997	14416	14730	12882	11582	10790	10177	11066	10123	9283	8361	7524
20 µM	SNA	18442	19019	19054	18074	17509	16724	18519	16351	15811	16328	14412	14916	11530	12900	11207	11565	10567	9715	8144	8579	7948
Fig1-Fig supplement 2F
T3Inh-1	0 µM	10 µM	25 µM
Repeat 1	1	1.16409	1.03882
Repeat 2	1	1.28101	1.45795
Repeat 3	1	1.13553	1.46477
Average	1	1.19354	1.32052
SD	0	0.0770819	0.243979
SEM	0	0.0445046	0.140866

## Sheet: VVA
Fig1-Fig supplement 2G
T3Inh-1	Lectin	510	512	514	516	518	520	522	524	526	528	530	532	534	536	538	540	542	544	546	548	550
0 µM	Ø	3375	2482	2249	2049	1925	1522	1377	1385	1211	1257	869	868	1305	1375	1298	1413	1364	1450	735	1400	1540
10 µM	Ø	4981	2791	1750	2314	1842	1636	1344	1564	1113	1320	987	1038	1466	993	1367	1213	1113	1174	1433	1181	925
20 µM	Ø	5666	2933	1845	2232	1845	1378	1632	1615	1413	1101	1391	1134	1027	789	1196	1270	1624	1091	1516	1332	1097
0 µM	VVA	19460	19022	19966	20103	20000	20018	20999	19467	18704	17761	15888	15310	15178	14738	13905	10895	10799	10649	11036	9007	8829
10 µM	VVA	19591	17446	19653	20711	21040	19923	18394	18353	18026	15889	18498	14575	14005	13652	12388	12651	10952	11389	9858	9962	8966
20 µM	VVA	21369	18906	20674	22798	20127	19290	19955	20714	17751	17893	17413	14994	14449	13097	12768	12858	11091	9855	10149	10569	9332
Fig1-Fig supplement 2H
T3Inh-1	0 µM	10 µM	25 µM
Repeat 1	1	0.9887	0.968426
Repeat 2	1	0.920237	1.06093
Repeat 3	1	0.716586	1.01179
Average	1	0.875174	1.01372
SD	0	0.141543	0.0462842
SEM	0	0.0817225	0.026723
