# Supplementary material for: Inhibitor of ppGalNAc-T3-mediated O-glycosylation blocks cancer cell invasiveness and lowers FGF23 levels
Source: eLife. 2017 Mar 31;6:e24051. doi: 10.7554/eLife.24051 (PMC5407854; doi:10.7554/eLife.24051)
Supplement: Figure 1—source data 1. — The accompanying spreadsheet shows calculated Q values (see Methods) for each compound tested. Note that autofluorescent compounds are left blank. DOI: http://dx.doi.org/10.7554/eLife.24051.004 [file elife-24051-fig1-data1.xlsx]

## Sheet: Sheet1
Screen Data for HEK cells expressing T2 or T3 sensors. Columns are: Our number (see text), Source of compound (see text), Identity Number used by source (either NSC or Chembridge), Molecular Weight, T2 sensor Q value replicate 1 (Q value defined in text), T2 sensor Q value replicate 2, T2 sensor Average for the two Q values, T3 sensor Q value replicate 1, T3 sensor Q value replicate 2, T3 sensor …
Number	Source	Source ID number	MW	T2 Sensor			T3 Sensor
				Q1	Q2	Ave-Q	Q1	Q2	Ave-Q
1	DTP	32065	76.05	-0.6	-0.9	-0.75	0.8	1.2	1
2	DTP	362856	194.15	-1.1	-1.5	-1.3	0.5	1	0.75
3	DTP	409962	214.05	-1.6	-1.5	-1.55	1.4	0.6	1
4	DTP	109724	261.09	-2.5	-2.7	-2.6	-0.1	-0.2	-0.15
5	DTP	719344	293.37	-2.2	-1.9	-2.05	1	-0.2	0.4
6	DTP	25154	356.06	-2.4	-2.2	-2.3	-0.1	-0.1	-0.1
7	DTP	757441	386.47	-0.5	-0.8	-0.65	0.9	0.5	0.7
8	DTP	732517	488.01	-1.7	-1.9	-1.8	0.2	0.2	0.2
9	DTP	760766	475.36	-1.9	-1.5	-1.7	1.9	2.3	2.1
10	DTP	758487	532.55	1.1	-0.1	0.5	1.7	2.1	1.9
11	DTP	1390	136.11	-0.5	-1.2	-0.85	0.6	1	0.8
12	DTP	750	246.29	-0.8	-0.8	-0.8	0.4	0.6	0.5
13	DTP	26271	261.09	-0.8	-1.2	-1	0.3	-0.5	-0.1
14	DTP	119875	300.06	-1	-1.2	-1.1	-0.2	0.3	0.05
15	DTP	719345	285	-1.2	-1.7	-1.45	0.3	0	0.15
16	DTP	71423	384.51	-2	-1.1	-1.55	-0.2	0.3	0.05
17	DTP	279836	444.49
18	DTP	737754	473.98	1.9	0	0.95	0.8	-0.4	0.2
19	DTP	761431	489.91	0.9	-0.4	0.25	-2	-1.5	-1.75
20	DTP	761068	501.51	1.6	0.1	0.85	-0.4	0.6	0.1
21	DTP	19893	130.07	-1.9	-0.4	-1.15	0.9	0.6	0.75
22	DTP	13875	210	-0.6	-0.6	-0.6	-0.4	1.4	0.5
23	DTP	34462	252.1	-1.4	0.1	-0.65	0.1	-0.1	0
24	DTP	122758	300.44	0.1	-1	-0.45	-0.2	0.1	-0.05
25	DTP	747972	259.26	-0.5	-0.3	-0.4	0	-0.7	-0.35
26	DTP	138783	394.73	-1.4	-1.2	-1.3	-0.5	-0.2	-0.35
27	DTP	698037	427.42	-0.9	-0.6	-0.75	-0.2	-0.5	-0.35
28	DTP	743414	493.61	-0.2	-0.7	-0.45	-1.5	-1.6	-1.55
29	DTP	763932	482.8	-1.7	-1.8	-1.75	0.1	-0.1	0
30	DTP	765694	530.45	-1.2	-2	-1.6	0.5	1.5	1
31	DTP	752	167	-1.6	-1.2	-1.4	-1.4	0.1	-0.65
32	DTP	27640	246.19	0	0.9	0.45	0.7	1.1	0.9
33	DTP	63878	280	0.2	0.7	0.45	1	0.9	0.95
34	DTP	169780	268.27	0.8	-0.3	0.25	-0.3	-0.9	-0.6
35	DTP	775351	273.25	-1.4	-0.8	-1.1	-0.1	-0.1	-0.1
36	DTP	312887	365.21	-0.8	-0.7	-0.75	0.2	-0.3	-0.05
37	DTP	715055	446.9	-2.7	-0.3	-1.5	1	1.4	1.2
38	DTP	747971	464.82	-1.6	-0.1	-0.85	-4.3	-4.5	-4.4
39	DTP	256439	533.96
40	DTP	82151	564	-2.7	-3.6	-3.15	1.5	0.3	0.9
41	DTP	755	152	-0.6	-0.2	-0.4	-0.8	-1	-0.9
42	DTP	45923	216.19	-0.4	0.8	0.2	0.7	1	0.85
43	DTP	66847	258.23	0.7	-0.3	0.2	0.2	1.7	0.95
44	DTP	218321	268.27	-0.4	0.1	-0.15	1.3	1.3	1.3
45	DTP	3088	304.22	0.4	0.6	0.5	0.3	0.8	0.55
46	DTP	681239	384.24	-1.2	-1.3	-1.25	-0.8	-0.9	-0.85
47	DTP	755986	421.3	-0.1	-0.8	-0.45	1	-0.4	0.3
48	DTP	747974	473.59	-0.7	-2.3	-1.5	2.5	2.9	2.7
49	DTP	747599	529.51	0.6	1.9	1.25	0.7	0.3	0.5
50	DTP	123127	579.99	-2.6	-1.8	-2.2	-1	-1.2	-1.1
51	DTP	762	192.52	1.2	0.3	0.75	1.8	1.5	1.65
52	DTP	79037	233.7	-1.1	0.1	-0.5	0.3	0.6	0.45
53	DTP	77213	257.76	-0.7	-1.2	-0.95	1.9	1.8	1.85
54	DTP	686673	297	0.1	0.1	0.1	0.5	0.4	0.45
55	DTP	26980	334.33	-0.5	-1	-0.75	0.3	0.4	0.35
56	DTP	712807	359.35	-0.9	-1.8	-1.35	0.5	0.9	0.7
57	DTP	756645	450.34	-4.6	-4.4	-4.5	-1.5	-0.9	-1.2
58	DTP	750691	485.94	-2	-2.3	-2.15	-1.5	-1.3	-1.4
59	DTP	747973	506.7	-1.4	0.4	-0.5	-2.4	-0.1	-1.25
60	DTP	141540	589	0.6	-0.6	0	0.1	0.3	0.2
61	DTP	6396	189	-1.8	-0.9	-1.35	0.8	0.7	0.75
62	DTP	102816	244.21	-0.2	-0.1	-0.15	-0.5	2	0.75
63	DTP	85998	265.22	0	-0.4	-0.2	1.4	1.2	1.3
64	DTP	701852	264.32	-2	-1.8	-1.9	0.9	0.8	0.85
65	DTP	38721	320.05	-2	-1.2	-1.6	1.1	1.1	1.1
66	DTP	719627	381	-1.4	-3.2	-2.3	0	0.1	0.05
67	DTP	740	454.44	-2.1	-1.2	-1.65	-1.9	-0.6	-1.25
68	DTP	754230	477.48	-0.6	0.6	0	-2.2	-2.3	-2.25
69	DTP	754143	540.69	3.8	2.2	3	-0.8	-0.2	-0.5
70	DTP	180973	563.65	-0.6	-2.3	-1.45	-1.7	-1.4	-1.55
71	DTP	18509	167.59	-2.6	-1.3	-1.95	0.6	-0.5	0.05
72	DTP	127716	228.21	-1.9	-0.5	-1.2	1	1.1	1.05
73	DTP	105014	285.69	-2.3	-2	-2.15	0.8	0.6	0.7
74	DTP	713563	296	-1.8	-1.5	-1.65	0.4	0.5	0.45
75	DTP	606869	303.68	-0.8	-0.9	-0.85	0.7	0.8	0.75
76	DTP	750690	398.47
77	DTP	609699	457.91	1.3	0.5	0.9	-1.7	-1.5	-1.6
78	DTP	755605	464.42	-1.3	-1.6	-1.45	-2.6	0.4	-1.1
79	DTP	758253	545.63	3.7	5.3	4.5	0.5	-1.4	-0.45
80	DTP	256942	579.99	-2.9	-2.9	-2.9	0.7	1.9	1.3
81	DTP	702294	564.35	-2.1	-0.9	-1.5	-0.8	-0.8	-0.8
82	DTP	758252	719.92	-1.4	-1.9	-1.65	0	-0.8	-0.4
83	DTP	3053	1255.43	-0.5	-1.8	-1.15	-1	1.1	0.05
84	DTP	45388	182.18	-0.9	-0.9	-0.9	0.2	0.5	0.35
85	DTP	8806	341.66	-0.7	-2.1	-1.4	0.3	-0.2	0.05
86	DTP	745750	581.06
87	DTP	628503	807.89	-0.6	-0.2	-0.4	-1	-1	-1
88	DTP	24559	1085.16	-0.8	-0.6	-0.7	-0.8	-1.9	-1.35
89	DTP	92859	197.84	-0.2	-0.7	-0.45	0.8	1.3	1.05
90	DTP	749226	349.51	-1.8	-0.2	-1	-0.7	-0.4	-0.55
91	DTP	616348	623.15	0.6	0.4	0.5	-0.9	-1.1	-1
92	DTP	761432	835.94	-0.2	-0.8	-0.5	-1.2	-1	-1.1
93	DTP	125066	1512.61	0.4	-1.3	-0.45	-1.7	-1.5	-1.6
94	DTP	9706	204	-0.9	-0.3	-0.6	1	0.3	0.65
95	DTP	719276	606.75	-1.5	-1.6	-1.55	-1.6	-0.7	-1.15
96	DTP	125973	853.92	-1.1	-0.7	-0.9	-0.9	-1.6	-1.25
97	DTP	608210	1079	0.1	2.1	1.1	1	0.4	0.7
98	DTP	241240	371	1.1	-0.7	0.2	0.2	1.1	0.65
99	DTP	758246	615.4	0.7	0.1	0.4	-0.7	-1.1	-0.9
100	DTP	49842	909.06	2.4	1.7	2.05	1	1.9	1.45
101	DTP	683864	1030.3	-0.5	-0.5	-0.5	-1.9	-1.4	-1.65
102	DTP	718781	429.9	0.4	1.1	0.75	1.6	2.7	2.15
103	DTP	764134	615.65	-0.8	0.1	-0.35	1.2	0.9	1.05
104	DTP	67574	923.04	1.9	0.9	1.4	2.8	0.4	1.6
105	DTP	613327	299.65	-0.5	-1.2	-0.85	-0.7	-1.7	-1.2
106	DTP	296961	214.22	-1	0.1	-0.45	1.4	0.9	1.15
107	DTP	122819	656.66	2.1	1.8	1.95	0.7	0.8	0.75
108	DTP	226080	914.18	-1	-1.1	-1.05	-1	1	0
109	DTP	369100	240.31	-1	-0.6	-0.8	-1.2	-1.5	-1.35
110	DTP	721517	272	-0.8	0.4	-0.2	0.8	-0.6	0.1
111	DTP	246131	723.64	-5.7	-5.5	-5.6	-1.4	-0.2	-0.8
112	DTP	733504	958.24	-3.1	-2.5	-2.8	0.4	0.1	0.25
113	DTP	761388	502.79	-2.1	-1.4	-1.75	-0.8	-0.2	-0.5
114	DTP	266046	397	-1	0	-0.5	-0.4	-0.4	-0.4
115	DTP	18473	125	1.8	1.4	1.6	-0.7	-0.8	-0.75
116	DTP	65248	150	1.8	0.9	1.35	-0.4	0	-0.2
117	DTP	173969	146	2	0.4	1.2	-0.7	0.7	0
118	DTP	7950	185	0.1	-1.1	-0.5	-0.2	-0.7	-0.45
119	DTP	12588	158	-0.8	-0.1	-0.45	-1.4	-0.5	-0.95
120	DTP	16646	180	0.8	-0.5	0.15	-1.8	-1.8	-1.8
121	DTP	23225	156	-0.7	0.9	0.1	1.6	0.5	1.05
122	DTP	29874	185	0.7	1.8	1.25	0.9	0.7	0.8
123	DTP	37408	166	0.6	0.6	0.6	0.7	0.9	0.8
124	DTP	43512	200	0.3	0.7	0.5	1.9	1.6	1.75
125	DTP	30041	136	1.2	2.5	1.85	2.3	1.5	1.9
126	DTP	75071	131	1.2	1.7	1.45	0.8	1.9	1.35
127	DTP	200686	138	2.1	1.2	1.65	0.7	1	0.85
128	DTP	10427	188	1	0.3	0.65	0.4	1.4	0.9
129	DTP	13213	187	1.4	1.2	1.3	0.4	0	0.2
130	DTP	16873	190	1.7	0.9	1.3	0.3	-0.2	0.05
131	DTP	27389	180	-0.1	1.9	0.9	0.9	0.8	0.85
132	DTP	31712	174	0.9	2.8	1.85	0.8	0.7	0.75
133	DTP	37883	187	1.9	1.6	1.75	-0.2	1.8	0.8
134	DTP	43546	156	1.7	2.1	1.9	1.8	0.8	1.3
135	DTP	38968	129.2	0.4	0.5	0.45	1.5	2.2	1.85
136	DTP	113532	145	1.2	0.8	1	0.7	1.7	1.2
137	DTP	679449	136	1.6	1.7	1.65	1.2	2.1	1.65
138	DTP	10772	178	2	1.6	1.8	1.1	2	1.55
139	DTP	14767	185	1.6	1.7	1.65	0.7	1	0.85
140	DTP	17796	162	0.8	0.3	0.55	-0.3	-0.6	-0.45
141	DTP	27626	194	1	0.3	0.65	1.6	1.3	1.45
142	DTP	34012	157	1.8	1.9	1.85	0.7	0.4	0.55
143	DTP	40840	156	1.2	1.7	1.45	1	0.9	0.95
144	DTP	43805	184	2.2	2.2	2.2	0.3	0.2	0.25
145	DTP	42633	149	1.6	1.9	1.75	1	0.8	0.9
146	DTP	122276	150	1.3	2	1.65	1.6	1.2	1.4
147	DTP	4135	190	-0.1	-0.6	-0.35	1.1	0.9	1
148	DTP	9441	190	1.6	2.3	1.95	1.5	1.3	1.4
149	DTP	14771	198	2.6	0.8	1.7	1.7	0.5	1.1
150	DTP	18415	191	0.8	0.3	0.55	0.5	-0.6	-0.05
151	DTP	28011	154	-0.7	1.8	0.55	0.9	0.4	0.65
152	DTP	34210	157	1.5	2.1	1.8	0.6	-0.1	0.25
153	DTP	41331	199	1.5	2.2	1.85	-0.2	0.6	0.2
154	DTP	44680	155	2.6	1.6	2.1	1	1	1
155	DTP	47881	145	1	2.1	1.55	2	0.6	1.3
156	DTP	123797	150	2.1	1	1.55	1.3	1.3	1.3
157	DTP	4426	191	1.7	1.9	1.8	2.2	0.9	1.55
158	DTP	9489	182	2.2	2	2.1	0.2	1.1	0.65
159	DTP	15133	171	1.4	0.7	1.05	0.6	0.3	0.45
160	DTP	19219	198	1.2	-0.1	0.55	0.2	0.1	0.15
161	DTP	28837	161	-0.1	2.7	1.3	1.3	1.1	1.2
162	DTP	34794	160	0.6	0.9	0.75	0.9	0.1	0.5
163	DTP	42021	197	0.4	-0.5	-0.05	0.3	1.5	0.9
164	DTP	44819	199	2.1	1.3	1.7	1.3	0.4	0.85
165	DTP	48231	138	0	1.3	0.65	1.9	1.7	1.8
166	DTP	135857	142	1.7	0.7	1.2	2.1	1.5	1.8
167	DTP	4936	165	0.9	2	1.45	1.8	1.4	1.6
168	DTP	11128	197	1.4	0.9	1.15	1	1	1
169	DTP	15776	193	0.5	1.2	0.85	0.8	0.1	0.45
170	DTP	19848	188	1.3	0.4	0.85	0	-0.4	-0.2
171	DTP	29193	184
172	DTP	34983	191	1.5	2.2	1.85	1.1	1.6	1.35
173	DTP	42028	158	1.8	2	1.9	0.7	1.5	1.1
174	DTP	45117	181	2.3	1.4	1.85	0.9	0.5	0.7
175	DTP	51787	145	0.1	1.7	0.9	1.7	1	1.35
176	DTP	148304	144	0.3	0.5	0.4	2	1.8	1.9
177	DTP	5784	180	1.3	1.5	1.4	1.2	1.6	1.4
178	DTP	11141	163	0.7	1.8	1.25	0.9	1.7	1.3
179	DTP	16021	164	0.9	0.1	0.5	0.9	0.8	0.85
180	DTP	20559	193	0.2	1.2	0.7	-0.4	-1.4	-0.9
181	DTP	29629	163	0.3	1.2	0.75	1.4	1.4	1.4
182	DTP	35534	181	1.1	1.4	1.25	1.3	1.1	1.2
183	DTP	42774	172	1.3	1.5	1.4	0.4	1.1	0.75
184	DTP	45641	190	0.6	1.9	1.25	0.6	0.5	0.55
185	DTP	54260	150	-0.1	0.5	0.2	1.6	1.7	1.65
186	DTP	149877	122	-0.2	0.5	0.15	2	2	2
187	DTP	7606	158	-0.7	0.7	0	1.8	1.5	1.65
188	DTP	11470	182	-0.7	-0.9	-0.8	0.1	0.8	0.45
189	DTP	16162	165	-0.9	0.5	-0.2	0.8	-0.7	0.05
190	DTP	22847	171	-0.8	-1.1	-0.95	-0.5	-1.7	-1.1
191	DTP	29851	155	-0.5	-0.3	-0.4	2	1.1	1.55
192	DTP	35679	180	0.3	1.2	0.75	1.9	0.4	1.15
193	DTP	43013	172	0.9	-0.7	0.1	-0.4	0.1	-0.15
194	DTP	45719	177	0	0.3	0.15	0.8	0.3	0.55
195	DTP	46273	198	-2.2	-2.4	-2.3	0.9	-1	-0.05
196	DTP	55573	171	-2.2	-1.5	-1.85	0.2	-0.4	-0.1
197	DTP	60373	183	-1.8	-1.9	-1.85	-0.9	-2.2	-1.55
198	DTP	63311	189	1.5	2.2	1.85	-0.8	-1.7	-1.25
199	DTP	73482	179	-1.7	-1.8	-1.75	1.2	0.9	1.05
200	DTP	79010	161	1.2	1.9	1.55	2.3	1.4	1.85
201	DTP	83345	199	-1.4	-0.8	-1.1	0.6	0.2	0.4
202	DTP	93260	157	-1.4	-1.1	-1.25	0.3	-0.4	-0.05
203	DTP	102509	180	-1.3	-0.7	-1	-1.6	-0.9	-1.25
204	DTP	109528	195	-0.7	-0.6	-0.65	-1.4	-0.8	-1.1
205	DTP	47496	188	-1.8	-1.6	-1.7	-0.2	-0.2	-0.2
206	DTP	53506	179	-1.5	-1	-1.25	1.2	0.9	1.05
207	DTP	60377	169	-1.1	-1.3	-1.2	-0.3	0.1	-0.1
208	DTP	63314	189	-0.6	-1.3	-0.95	-0.9	-0.8	-0.85
209	DTP	75585	171	-1.6	-2.1	-1.85	-0.6	-0.9	-0.75
210	DTP	79582	196	-0.7	-2.8	-1.75	-0.9	-1.4	-1.15
211	DTP	84200	169	-1.8	-1.3	-1.55	0.3	0.5	0.4
212	DTP	96979	152	-0.9	-0.4	-0.65	-0.5	0	-0.25
213	DTP	104969	195	-0.2	-0.3	-0.25	1.4	1.5	1.45
214	DTP	62840	171	-0.3	-0.9	-0.6	-1.8	-1.8	-1.8
215	DTP	48422	173	-0.8	-1.2	-1	0.9	1	0.95
216	DTP	54834	181	-0.7	-0.3	-0.5	0.2	1.2	0.7
217	DTP	60530	151	-0.8	-1.8	-1.3	0.1	0.9	0.5
218	DTP	64952	154	-1	-2	-1.5	1	-1.1	-0.05
219	DTP	75786	159	0.3	-0.6	-0.15	-0.6	-0.5	-0.55
220	DTP	80807	198	-1.6	-0.5	-1.05	-0.3	-0.3	-0.3
221	DTP	85331	177	-0.7	0	-0.35	-0.8	0	-0.4
222	DTP	97090	151	0.6	0.9	0.75	-0.7	0.4	-0.15
223	DTP	106045	187	-0.6	0.5	-0.05	0.6	0.1	0.35
224	DTP	41833	125	0.9	0.3	0.6	-0.3	-1.3	-0.8
225	DTP	49252	156	-1.3	-1.9	-1.6	0.5	0.2	0.35
226	DTP	55957	198	0.1	0	0.05	1.1	0.7	0.9
227	DTP	60548	175	-0.5	-0.9	-0.7	0.6	-0.1	0.25
228	DTP	66241	200	-0.7	0.9	0.1	0.8	-0.4	0.2
229	DTP	75846	157	0.2	-1.5	-0.65	-1	-0.7	-0.85
230	DTP	81462	182.27	-0.1	-1	-0.55	-1.1	-0.8	-0.95
231	DTP	88882	196	-0.5	0.2	-0.15	0	-0.7	-0.35
232	DTP	97104	192	0.2	0	0.1	-1	-1.2	-1.1
233	DTP	106261	179	-0.2	1	0.4	0.2	0.3	0.25
234	DTP	16631	154	-0.4	0.9	0.25	0	-1.5	-0.75
235	DTP	50751	186	-1.3	-0.4	-0.85	1.9	1.6	1.75
236	DTP	56914	184	0.9	-0.5	0.2	0.9	1.3	1.1
237	DTP	62129	184	0	-0.1	-0.05	-0.2	0.8	0.3
238	DTP	67307	186	-0.1	-0.1	-0.1	0.6	-0.6	0
239	DTP	77422	200	0.4	-0.5	-0.05	-0.1	-1.3	-0.7
240	DTP	82769	172	-1.1	-0.7	-0.9	-1.3	-1.1	-1.2
241	DTP	89720	151	-1.3	-0.3	-0.8	1	0	0.5
242	DTP	97538	157	-0.5	0.5	0	0	-0.2	-0.1
243	DTP	108655	167	0.5	0.6	0.55	0.4	0	0.2
244	DTP	20586	192	0.5	1.2	0.85	0.5	0.1	0.3
245	DTP	50858	182	-1.1	-0.5	-0.8	0.6	0.8	0.7
246	DTP	57741	174	0	-1.3	-0.65	0.8	1.2	1
247	DTP	62318	194	0.1	-0.7	-0.3	-1	0.6	-0.2
248	DTP	68657	178	-0.1	-0.9	-0.5	0.6	0.5	0.55
249	DTP	77913	194	-0.3	-0.9	-0.6	-0.6	-0.2	-0.4
250	DTP	83076	151	-0.6	-1.4	-1	-1.4	-0.9	-1.15
251	DTP	91438	194	-0.7	-1.6	-1.15	0.7	0	0.35
252	DTP	99756	196	-1.3	0	-0.65	-0.2	-1.6	-0.9
253	DTP	109176	168	-0.9	0.6	-0.15	-0.3	-1.4	-0.85
254	DTP	40817	193	0.5	-0.1	0.2	-0.2	-0.8	-0.5
255	DTP	51093	180	-1.5	-0.9	-1.2	0.5	0.4	0.45
256	DTP	57890	194	-0.9	-0.9	-0.9	0.3	0.9	0.6
257	DTP	62511	190	-0.9	0.1	-0.4	-1	0	-0.5
258	DTP	70717	165	-1	-1.7	-1.35	-0.1	-0.3	-0.2
259	DTP	78609	173	-1	-1	-1	-0.9	-0.5	-0.7
260	DTP	83237	191	-0.2	-0.8	-0.5	-1.2	-1.3	-1.25
261	DTP	92264	176	-2.1	-1.6	-1.85	-0.5	-0.1	-0.3
262	DTP	100729	162	-0.8	0.1	-0.35	0.6	0.2	0.4
263	DTP	109231	197	-0.3	0.3	0	-0.3	-1.4	-0.85
264	DTP	42231	182	-0.9	-0.2	-0.55	0.1	-1.3	-0.6
265	DTP	55459	189	-1.8	-0.7	-1.25	-0.4	1.5	0.55
266	DTP	60239	192	1.1	2.3	1.7	-1.3	-1.7	-1.5
267	DTP	62609	195	-1.1	-1.1	-1.1	-0.2	0.6	0.2
268	DTP	72292	198	-1.7	-2.1	-1.9	-0.1	-0.6	-0.35
269	DTP	78999	173	-1	-2.1	-1.55	0	-1.9	-0.95
270	DTP	83339	191	-1	-1.9	-1.45	0.6	0.7	0.65
271	DTP	92753	187	-1.8	-1.2	-1.5	0.7	-1.4	-0.35
272	DTP	102025	198	-1.5	-1.8	-1.65	-1.7	0.4	-0.65
273	DTP	109292	158	-2.1	-0.2	-1.15	-1.7	-1.7	-1.7
274	DTP	82339	189.26	-1.3	0.7	-0.3	0	0.1	0.05
275	DTP	109813	187	-0.5	-0.5	-0.5	-0.5	-0.4	-0.45
276	DTP	122131	173	-0.5	0	-0.25	-1	-1.1	-1.05
277	DTP	134577	164	0.1	-0.4	-0.15	-1.5	-1.4	-1.45
278	DTP	150982	188	-1.4	-0.6	-1	-0.9	-0.6	-0.75
279	DTP	156571	171	-0.8	-1.4	-1.1	-1.6	-2.2	-1.9
280	DTP	169458	185	-1.4	-1.4	-1.4	-1.6	-2	-1.8
281	DTP	195031	185.31	0.2	1	0.6	0.3	-0.1	0.1
282	DTP	276369	182	0.6	0.8	0.7	-0.2	-0.3	-0.25
283	DTP	303244	199	0.8	1.4	1.1	-0.8	-1.3	-1.05
284	DTP	335649	166	0.4	0.8	0.6	-1.1	-1.3	-1.2
285	DTP	109885	181	-0.7	-0.5	-0.6	1.1	-0.2	0.45
286	DTP	123458	193	-0.7	-0.1	-0.4	-0.1	-0.6	-0.35
287	DTP	134580	167	-0.6	-0.2	-0.4	-1.3	-1.6	-1.45
288	DTP	151901	189	-1.3	-0.6	-0.95	-0.6	-1.1	-0.85
289	DTP	160005	168	-0.6	-1	-0.8	-0.8	-1.6	-1.2
290	DTP	169566	151	-0.6	-1.3	-0.95	-1.5	-1.3	-1.4
291	DTP	203065	191	0.8	0.8	0.8	0	0.8	0.4
292	DTP	278741	177	0.5	1.1	0.8	0.4	-0.3	0.05
293	DTP	303603	200	1.3	1.1	1.2	-0.8	-0.7	-0.75
294	DTP	338205	175	0.5	1	0.75	-0.7	-1.5	-1.1
295	DTP	111107	184	-0.5	-0.5	-0.5	-2	-0.2	-1.1
296	DTP	125197	193	-0.4	-0.3	-0.35	-0.2	-0.6	-0.4
297	DTP	134784	182	-0.5	-0.8	-0.65	-1.2	-1	-1.1
298	DTP	152632	174	-1.1	-0.5	-0.8	-0.6	-0.9	-0.75
299	DTP	162915	197	-0.6	-0.9	-0.75	-0.7	-1.7	-1.2
300	DTP	173101	193	-0.9	-0.8	-0.85	-1.1	-1.4	-1.25
301	DTP	206630	172	0.6	0.8	0.7	1	2.3	1.65
302	DTP	279834	187	1.4	1.3	1.35	1.9	1.1	1.5
303	DTP	303800	171	1.3	1.6	1.45	-0.5	-0.7	-0.6
304	DTP	339578	199	1.4	1.2	1.3	-0.4	-0.5	-0.45
305	DTP	116565	199	-0.6	-0.1	-0.35	-1.8	-0.8	-1.3
306	DTP	127216	162	-0.3	0.1	-0.1	-0.1	-0.4	-0.25
307	DTP	134785	197	-0.6	-0.3	-0.45	-0.9	-0.8	-0.85
308	DTP	154316	153	-0.6	-0.2	-0.4	-0.4	-0.9	-0.65
309	DTP	163104	198	-0.7	-0.8	-0.75	-0.8	-0.9	-0.85
310	DTP	173103	196	-0.8	-1.1	-0.95	-0.6	-1.5	-1.05
311	DTP	227309	189	0.4	0.9	0.65	0	0.8	0.4
312	DTP	284701	152	1.2	1.4	1.3	1.5	0.7	1.1
313	DTP	304902	186	1.5	0.8	1.15	1.3	-0.5	0.4
314	DTP	341902	178	0.7	1	0.85	-0.9	0	-0.45
315	DTP	117386	170	-0.5	-0.2	-0.35	-1.5	-0.4	-0.95
316	DTP	127458	195	-0.4	-0.1	-0.25	0.1	-0.2	-0.05
317	DTP	135351	151	-0.1	-0.6	-0.35	-0.6	-1.2	-0.9
318	DTP	154718	183	-0.5	0	-0.25	-0.4	-1.5	-0.95
319	DTP	163158	165	-0.7	-0.8	-0.75	-0.9	-1.8	-1.35
320	DTP	177952	156	-0.7	-0.7	-0.7	-1.8	-1.7	-1.75
321	DTP	234764	196	0.5	1.2	0.85	-0.2	1.5	0.65
322	DTP	287065	178	1	1.3	1.15	1.7	1.4	1.55
323	DTP	311723	189	1.2	1.3	1.25	0.9	0.1	0.5
324	DTP	342460	183	0.7	0.7	0.7	-0.6	-0.3	-0.45
325	DTP	118832	191	-0.2	-0.6	-0.4	-1	-0.2	-0.6
326	DTP	127947	199	-0.2	-0.3	-0.25	-0.3	-0.8	-0.55
327	DTP	136065	191	-0.4	-0.1	-0.25	-0.8	-0.7	-0.75
328	DTP	155196	169	-0.6	-0.1	-0.35	-0.4	-1.8	-1.1
329	DTP	163920	184	-0.5	-0.6	-0.55	-1.2	-1.3	-1.25
330	DTP	191029	183	-0.8	-0.7	-0.75	-1.2	-1.5	-1.35
331	DTP	246415	200	0.7	1.5	1.1	0.3	0.9	0.6
332	DTP	287495	182	1.5	0.9	1.2	1.4	1.1	1.25
333	DTP	321484	165	1.3	1.5	1.4	0.4	0.2	0.3
334	DTP	344494	175	1.6	1.3	1.45	0.1	-0.2	-0.05
335	DTP	119969	188	0	-0.4	-0.2	-1.8	-0.9	-1.35
336	DTP	128068	183	-0.3	0.1	-0.1	-0.1	-0.6	-0.35
337	DTP	145180	167	0.1	-0.2	-0.05	-1.1	-1.3	-1.2
338	DTP	155698	200	-0.6	-0.1	-0.35	-0.5	-1.5	-1
339	DTP	164965	187	-0.2	-0.5	-0.35	-1.4	-0.9	-1.15
340	DTP	194242	161	-0.1	-0.7	-0.4	-1.5	-1.5	-1.5
341	DTP	269905	188	0.8	1.5	1.15	0.6	0	0.3
342	DTP	288686	189	1.3	1.3	1.3	1	0.8	0.9
343	DTP	331198	155	1.6	1.1	1.35	0.2	-0.1	0.05
344	DTP	351110	183	1.3	1.2	1.25	-0.3	-0.7	-0.5
345	DTP	120312	196	-0.1	-0.3	-0.2	-0.9	-0.2	-0.55
346	DTP	131982	194	-0.6	0	-0.3	-0.5	-1.5	-1
347	DTP	147829	186	-0.2	0	-0.1	-0.7	-0.5	-0.6
348	DTP	155703	196	-0.1	-0.1	-0.1	-1.6	-0.8	-1.2
349	DTP	166900	156	-0.9	-1	-0.95	-1.7	-0.8	-1.25
350	DTP	194243	176	-0.7	-0.9	-0.8	-1.1	-1.7	-1.4
351	DTP	272275	159	2.9	3.6	3.25	1.3	1.3	1.3
352	DTP	295701	189	1	0.6	0.8	-0.1	-0.2	-0.15
353	DTP	331208	175	1.3	1.1	1.2	-0.4	-0.7	-0.55
354	DTP	361056	198	0.2	0.7	0.45	-0.6	-1.3	-0.95
355	DTP	365560	187	-3.4	-2.5	-2.95	1.1	-0.2	0.45
356	DTP	672441	158	-1.5	0	-0.75	-3.1	-3	-3.05
357	DTP	4263	225	0.7	0.1	0.4	-2.6	-2.1	-2.35
358	DTP	8813	238	-1.6	-0.6	-1.1	1.5	1.1	1.3
359	DTP	10428	204	-2.7	-0.7	-1.7	-1.2	-1.4	-1.3
360	DTP	13974	247	-0.1	-0.4	-0.25	-1.8	-0.7	-1.25
361	DTP	16416	234	0.9	0.9	0.9	-0.5	0.9	0.2
362	DTP	19487	220	0.9	1.9	1.4	0.5	0.1	0.3
363	DTP	23247	237	1.2	1.8	1.5	0.1	-0.4	-0.15
364	DTP	27032	223	1	0.8	0.9	0.3	1.1	0.7
365	DTP	366808	197	0.5	0.4	0.45	-1.5	-1.2	-1.35
366	DTP	1451	239.28	1.6	1	1.3	-1.3	-1.9	-1.6
367	DTP	4921	214	2	1.8	1.9	-1.9	-1.6	-1.75
368	DTP	9064	204	-2.3	-2.3	-2.3	0.9	1.1	1
369	DTP	10995	241	1.1	1.7	1.4	-2	-0.8	-1.4
370	DTP	14303	222	-3.7	-2.7	-3.2	-1.8	-1.8	-1.8
371	DTP	16813	216	-0.4	-0.3	-0.35	0.1	-0.7	-0.3
372	DTP	19637	226	-1.9	-0.5	-1.2	0.4	-0.7	-0.15
373	DTP	23248	227	1.5	0.8	1.15	0.3	-0.2	0.05
374	DTP	27628	208	0.2	0.7	0.45	-0.3	0.4	0.05
375	DTP	370387	161	-2.5	-2.3	-2.4	-0.4	-0.4	-0.4
376	DTP	1620	215.21	0.6	0.8	0.7	-0.2	-0.6	-0.4
377	DTP	5995	213	-2.1	-1.3	-1.7	-1	-1.7	-1.35
378	DTP	9341	237	-0.3	1.3	0.5	-1.2	-0.5	-0.85
379	DTP	11149	235	1.7	2.2	1.95	-0.3	-0.7	-0.5
380	DTP	14304	222	1.8	1.8	1.8	-0.7	-1.2	-0.95
381	DTP	17129	242	-1.5	-0.7	-1.1	0.5	0.8	0.65
382	DTP	20045	205	1.7	0.6	1.15	0	-0.6	-0.3
383	DTP	23672	222	-0.1	1.1	0.5	-0.3	0.6	0.15
384	DTP	28341	210	0.7	1	0.85	-0.2	0.5	0.15
385	DTP	372063	191	1.8	1.5	1.65	-0.6	0.7	0.05
386	DTP	1751	224	-2	-1.7	-1.85	-1.6	-0.4	-1
387	DTP	6866	232	-1.7	-2.1	-1.9	-0.3	-1	-0.65
388	DTP	9358	226	-1.9	-2	-1.95	-0.4	-1.5	-0.95
389	DTP	11150	235	1.4	1.2	1.3	-0.5	-1.2	-0.85
390	DTP	14540	219	0.3	0.4	0.35	-0.4	-1	-0.7
391	DTP	17339	213	-1.2	1.5	0.15	-0.3	0	-0.15
392	DTP	21034	237	1.4	-0.6	0.4	0.2	0.4	0.3
393	DTP	23895	221	0.5	-1	-0.25	0.2	-0.1	0.05
394	DTP	29471	213	-0.2	0.2	0	0.1	0.5	0.3
395	DTP	407282	190.24	-0.8	-1.2	-1	0.1	0.6	0.35
396	DTP	2561	240	0.5	0.2	0.35	1.1	0.4	0.75
397	DTP	6910	250	-1.6	-1.4	-1.5	0.7	-1.3	-0.3
398	DTP	9461	202	-1.5	-0.6	-1.05	-1.1	-1.4	-1.25
399	DTP	11826	228	1.9	-0.3	0.8	-0.5	-0.6	-0.55
400	DTP	15362	227	-0.6	-0.4	-0.5	-0.7	-2	-1.35
401	DTP	19063	230	-1.4	-0.4	-0.9	0.6	0.1	0.35
402	DTP	21678	232	-1	-0.9	-0.95	-0.3	-0.1	-0.2
403	DTP	23906	201	-0.6	-0.7	-0.65	0.1	0.8	0.45
404	DTP	162292	196	1.2	-1.2	0	-0.1	0.5	0.2
405	DTP	513815	178	1	0.2	0.6	-0.5	-0.1	-0.3
406	DTP	2805	246.26	-2.4	-3.5	-2.95	-0.2	0.6	0.2
407	DTP	8090	247	0	-0.6	-0.3	-1.2	0.3	-0.45
408	DTP	9852	240	-3	-1.8	-2.4	-0.6	0	-0.3
409	DTP	11891	225	0.9	-0.3	0.3	-0.2	0	-0.1
410	DTP	15364	242	-0.8	1.2	0.2	0.3	-0.6	-0.15
411	DTP	19096	222	-0.7	0.2	-0.25	0.9	0.2	0.55
412	DTP	21725	244	-0.1	-1.6	-0.85	0.5	-0.1	0.2
413	DTP	24035	227	0.6	0.1	0.35	0.8	0.6	0.7
414	DTP	112975	191	-1	0.4	-0.3	0	0.4	0.2
415	DTP	650438	179	0.3	-0.9	-0.3	0.5	0.2	0.35
416	DTP	3001	214	0.1	0.3	0.2	1.1	0.4	0.75
417	DTP	8179	203	0.2	1	0.6	0.9	0.5	0.7
418	DTP	10091	240	1.4	-0.1	0.65	-0.1	-0.7	-0.4
419	DTP	11991	226	-0.3	-1.1	-0.7	0.1	0.4	0.25
420	DTP	15372	235	-2.7	-3.4	-3.05	-0.3	0.5	0.1
421	DTP	19108	244	-1.3	-1.3	-1.3	0.5	0.2	0.35
422	DTP	22939	224	-0.4	-1.1	-0.75	-0.1	0.2	0.05
423	DTP	25368	216	-1.8	-1	-1.4	0.2	0.1	0.15
424	DTP	281639	156	-0.8	-0.6	-0.7	0.5	0.6	0.55
425	DTP	664971	169	-3.2	-2.6	-2.9	0.9	0.5	0.7
426	DTP	3961	228	0.3	0.1	0.2	0.3	0.2	0.25
427	DTP	8481	208	0.2	0.5	0.35	1	-0.7	0.15
428	DTP	10416	243	-0.3	-0.3	-0.3	-0.5	-1.5	-1
429	DTP	13653	218	0.8	1	0.9	-0.7	0.5	-0.1
430	DTP	15571	246	-3.6	-3.4	-3.5	-0.6	-0.1	-0.35
431	DTP	19115	217	-2.2	-1.7	-1.95	-0.3	-0.7	-0.5
432	DTP	23123	240	-1.4	-0.6	-1	0	0	0
433	DTP	26744	238	-0.5	0.2	-0.15	0	0.3	0.15
434	DTP	176324	195	-1.9	-0.9	-1.4	0	-0.3	-0.15
435	DTP	29620	212	1.8	1.6	1.7	-1.7	-2.1	-1.9
436	DTP	35676	220.18	1.2	3.5	2.35	0.7	0.5	0.6
437	DTP	38490	249	0	0.2	0.1	1.4	0.2	0.8
438	DTP	40614	224	-0.8	0.9	0.05	0.5	0.4	0.45
439	DTP	46615	233	-0.1	0.2	0.05	-2.6	-2.7	-2.65
440	DTP	51936	214	0.7	-1.4	-0.35	0.6	0.7	0.65
441	DTP	57670	230	0.9	0.9	0.9	-0.7	-1	-0.85
442	DTP	61910	231	0.2	-0.5	-0.15	-0.5	-0.2	-0.35
443	DTP	69421	250	-1.1	0.3	-0.4	-0.3	-0.6	-0.45
444	DTP	79253	244	0.4	1.2	0.8	-0.2	-0.7	-0.45
445	DTP	31208	248	1.6	1.9	1.75	-1.9	-1.7	-1.8
446	DTP	35964	238	0.7	1.2	0.95	1.6	1	1.3
447	DTP	38743	248	0.9	1	0.95	0.9	0.4	0.65
448	DTP	40669	209	0.4	-0.1	0.15	1	0.5	0.75
449	DTP	47617	248	0.6	0.8	0.7	1.2	0	0.6
450	DTP	53710	204	-0.9	-1.8	-1.35	0.6	0.7	0.65
451	DTP	57794	219	0.8	-0.2	0.3	-0.8	-1	-0.9
452	DTP	62611	212	1.2	0	0.6	-0.4	0	-0.2
453	DTP	70534	240	1.2	1.9	1.55	-0.4	-0.3	-0.35
454	DTP	79538	205	0.3	1.3	0.8	-1	-1	-1
455	DTP	31664	233	2.1	1.6	1.85	-0.9	-0.7	-0.8
456	DTP	36425	241	0.3	0.9	0.6	-1.2	-1.5	-1.35
457	DTP	38845	242	1.1	1.1	1.1	-1.4	-0.9	-1.15
458	DTP	41092	215	0.3	0.5	0.4	-1.3	-1	-1.15
459	DTP	47619	216	1	0.3	0.65	-1.4	-0.9	-1.15
460	DTP	55770	206	-0.3	-1.4	-0.85	0.6	0.3	0.45
461	DTP	58907	237	0.6	0.4	0.5	0.4	-0.9	-0.25
462	DTP	62665	205	0.9	1.1	1	0.1	0.3	0.2
463	DTP	73170	244	0.3	1.9	1.1	-0.7	-0.2	-0.45
464	DTP	80141	250	0.7	0.3	0.5	-0.9	-0.4	-0.65
465	DTP	31741	203	0.9	1.6	1.25	-0.4	-0.3	-0.35
466	DTP	36520	238	1.7	1	1.35	-0.4	-0.1	-0.25
467	DTP	38983	224	0.9	2.8	1.85	-0.1	-1.6	-0.85
468	DTP	42014	228	2.3	0.8	1.55	-0.4	-1.5	-0.95
469	DTP	48964	210	-0.3	0.8	0.25	-0.4	-2.5	-1.45
470	DTP	56455	235	0.3	-1.2	-0.45	-1.1	-2	-1.55
471	DTP	59776	220	-0.1	0.2	0.05	0.6	-0.4	0.1
472	DTP	63001	236	2	1.1	1.55	-0.3	0.6	0.15
473	DTP	75241	247	-0.6	1.8	0.6	0.5	0.5	0.5
474	DTP	81018	242	1.5	1.4	1.45	-0.1	-0.8	-0.45
475	DTP	32838	202	1.5	1.1	1.3	0.3	0.2	0.25
476	DTP	36582	219	-0.1	1.1	0.5	-1.7	-0.8	-1.25
477	DTP	39336	223	1	1	1	0	-0.5	-0.25
478	DTP	42846	213	1.9	1.1	1.5	-0.1	0.1	0
479	DTP	49652	225	1.7	1.8	1.75	-0.8	-0.5	-0.65
480	DTP	57103	235	-0.4	-0.6	-0.5	-0.8	-1.2	-1
481	DTP	60034	244.29	0.5	0.6	0.55	0.1	0.2	0.15
482	DTP	63865	244	0.1	1.7	0.9	0.5	0.5	0.5
483	DTP	75885	234	1.4	1.3	1.35	0.4	0.2	0.3
484	DTP	81120	249.33	1.9	1.6	1.75	0	-0.9	-0.45
485	DTP	33005	243	0.1	0.3	0.2	1.7	0.3	1
486	DTP	37003	244	1.7	1.5	1.6	-0.5	0.3	-0.1
487	DTP	40383	226	0.1	2.2	1.15	0	0.4	0.2
488	DTP	44688	232	-0.2	2	0.9	-0.2	0.3	0.05
489	DTP	49701	230	-0.4	0.1	-0.15	-0.1	-1.1	-0.6
490	DTP	57165	202	1.1	-1.5	-0.2	0.1	-0.3	-0.1
491	DTP	60266	228	0.4	1.4	0.9	0.5	-0.5	0
492	DTP	63963	248	0.9	1.5	1.2	0.2	0.3	0.25
493	DTP	77596	244	1.9	1.5	1.7	0.7	0.9	0.8
494	DTP	81213	237	-0.3	1.1	0.4	0.1	-0.8	-0.35
495	DTP	34774	230	0.7	1.7	1.2	0.9	0.8	0.85
496	DTP	37812	212	1.3	0.1	0.7	0.5	0.4	0.45
497	DTP	40467	224	0.9	1.2	1.05	-0.4	0.4	0
498	DTP	45153	222	0	0	0	-0.9	0.1	-0.4
499	DTP	50633	237	0.5	1.1	0.8	-0.1	-0.1	-0.1
500	DTP	57318	225	1.1	-1.5	-0.2	-1.5	-1.5	-1.5
501	DTP	60419	203	0.8	1.5	1.15	0.7	0.3	0.5
502	DTP	66837	230	-0.3	1.6	0.65	0.7	0.4	0.55
503	DTP	78130	243	1.5	0.9	1.2	0.8	0.7	0.75
504	DTP	81660	217	0.9	0	0.45	0.2	-0.6	-0.2
505	DTP	34777	214	0.4	1.9	1.15	-0.4	0	-0.2
506	DTP	38042	237	-0.2	0.1	-0.05	-0.7	0.1	-0.3
507	DTP	40500	237	1.1	0.8	0.95	0	-1.1	-0.55
508	DTP	45291	214	1	1.1	1.05	-1	-0.8	-0.9
509	DTP	51331	238	0.4	2	1.2	-0.8	-0.5	-0.65
510	DTP	57345	226	0.8	-0.9	-0.05	-0.5	-0.2	-0.35
511	DTP	61888	207	-0.3	0.9	0.3	0.4	-1.5	-0.55
512	DTP	67546	203	0.9	1	0.95	-0.1	-0.6	-0.35
513	DTP	79139	246	1.2	-0.4	0.4	0.8	0.3	0.55
514	DTP	81703	224	0.6	0.8	0.7	1.2	0.2	0.7
515	DTP	83715	247	1.2	1.3	1.25	1.8	1.5	1.65
516	DTP	88998	236	-0.1	0.7	0.3	1.4	1.4	1.4
517	DTP	93817	227	0.7	0.6	0.65	0.7	0.9	0.8
518	DTP	102086	237	-1	0.1	-0.45	0.4	0.5	0.45
519	DTP	106570	238.29	-0.8	1.4	0.3	0.7	0.2	0.45
520	DTP	109174	241.25	-1	0.3	-0.35	0.5	0.2	0.35
521	DTP	117554	250	-0.6	0.1	-0.25	0.2	0.3	0.25
522	DTP	122297	239	-0.8	1.3	0.25	-0.2	-0.2	-0.2
523	DTP	126757	220.19	0.9	-0.2	0.35	-0.4	-0.3	-0.35
524	DTP	56906	214	0.4	0.4	0.4	-1.6	-0.5	-1.05
525	DTP	85179	220	1.2	1	1.1	1.9	1.9	1.9
526	DTP	89249	224	0.8	0.6	0.7	1.6	1.9	1.75
527	DTP	96491	241	1.1	1	1.05	1.6	0	0.8
528	DTP	102288	205	2	0.1	1.05	1.4	0.1	0.75
529	DTP	106863	242	1.8	1.3	1.55	1.1	1.1	1.1
530	DTP	109466	245	1.1	0.5	0.8	0.4	1	0.7
531	DTP	117741	217	-1	0	-0.5	0.7	0.4	0.55
532	DTP	122376	226	-0.9	1	0.05	-0.3	-0.5	-0.4
533	DTP	128141	236	-1.2	1.7	0.25	0	0	0
534	DTP	70959	201	0	0	0	-1.1	-0.5	-0.8
535	DTP	85326	211
536	DTP	89258	218	-0.2	2.8	1.3	1.4	1.8	1.6
537	DTP	98683	211	0.4	0.4	0.4	0.9	1.5	1.2
538	DTP	103770	213	0.3	0.1	0.2	1	0.9	0.95
539	DTP	108235	229	0.4	2.4	1.4	2	1	1.5
540	DTP	109719	204	2	1.7	1.85	0.5	-0.4	0.05
541	DTP	117922	210	-0.8	0.4	-0.2	0.7	0.7	0.7
542	DTP	122987	212	0.1	0.5	0.3	0.1	0.1	0.1
543	DTP	128737	210	0.5	0.9	0.7	-0.2	0.1	-0.05
544	DTP	71795	246	-5.2	-5.2	-5.2	0.3	0	0.15
545	DTP	87352	212	1	1.2	1.1	2	1.7	1.85
546	DTP	89723	232	1.7	1.7	1.7	1.6	1.4	1.5
547	DTP	98857	211	2.3	1.6	1.95	0.8	1.6	1.2
548	DTP	103775	228	0.7	0.7	0.7	1.3	1.1	1.2
549	DTP	108750	250	0.4	2.4	1.4	1.1	1.2	1.15
550	DTP	111552	202	2.3	1.1	1.7	0.7	0.2	0.45
551	DTP	120286	220	-1.5	0.3	-0.6	0.6	0.7	0.65
552	DTP	123141	214	0.2	0.8	0.5	0.2	0.4	0.3
553	DTP	128751	229	-0.1	1.9	0.9	0.1	-1.2	-0.55
554	DTP	73054	234	0.3	2	1.15	0.3	-0.9	-0.3
555	DTP	87822	244	1.4	1.8	1.6	1.5	1.8	1.65
556	DTP	91516	212	1.3	1.8	1.55	1.5	2	1.75
557	DTP	99796	230	1.3	1.4	1.35	1.7	1.4	1.55
558	DTP	106208	248	1.7	1.4	1.55	1.6	1.8	1.7
559	DTP	108753	209	1.9	1	1.45	0.4	-0.3	0.05
560	DTP	112677	240	2	0.3	1.15	1.1	0.9	1
561	DTP	120307	227	-0.5	0.6	0.05	0.7	0	0.35
562	DTP	124146	245	0.2	0.7	0.45	-1.1	-0.2	-0.65
563	DTP	68982	231	0.5	0	0.25	-1.4	-0.6	-1
564	DTP	101653	209	0.6	-0.2	0.2	-1.1	-1.3	-1.2
565	DTP	88811	212	1.5	1.7	1.6	1.6	1.7	1.65
566	DTP	92207	208	1.8	1.6	1.7	1.7	1.9	1.8
567	DTP	100120	241	1.4	1.3	1.35	1.5	1.7	1.6
568	DTP	106282	249	1.9	1.6	1.75	1.3	1.4	1.35
569	DTP	108972	223	1.9	1.8	1.85	1	0.4	0.7
570	DTP	113486	209	1.9	0.8	1.35	1	1.1	1.05
571	DTP	120844	210	-0.6	0.4	-0.1	-0.8	-0.4	-0.6
572	DTP	125043	212	0.5	0.3	0.4	-0.1	0.2	0.05
573	DTP	50405	202	-0.1	0.7	0.3	-0.9	-0.8	-0.85
574	DTP	34488	239	0.3	0.3	0.3	-0.4	-0.8	-0.6
575	DTP	88883	215	1.8	0.5	1.15	1.8	0.8	1.3
576	DTP	92709	210	1	0.4	0.7	1.6	1.6	1.6
577	DTP	101266	219	0.8	0.8	0.8	1.5	2	1.75
578	DTP	106461	240	1.1	1.3	1.2	0.3	1.2	0.75
579	DTP	109084	214	0.8	1.5	1.15	1	1	1
580	DTP	114490	226	1.5	-0.6	0.45	-0.6	1	0.2
581	DTP	121781	240	-0.9	-1.2	-1.05	-0.4	-0.1	-0.25
582	DTP	125727	226	0.2	0.7	0.45	-0.1	-0.8	-0.45
583	DTP	42212	223	0.1	-0.2	-0.05	-0.4	-1.6	-1
584	DTP	34769	218	-0.2	-0.8	-0.5	-1.3	-1	-1.15
585	DTP	88962	210	0.5	0.6	0.55	1.5	1.6	1.55
586	DTP	92794	245	0.7	0.8	0.75	1	0.8	0.9
587	DTP	101777	250	0.9	0.8	0.85	0.4	1.4	0.9
588	DTP	106506	224	-0.5	0.8	0.15	0.5	0.2	0.35
589	DTP	109086	228	-0.5	-0.4	-0.45	-0.3	0.3	0
590	DTP	114831	243	-0.7	0.4	-0.15	-0.1	0.6	0.25
591	DTP	122280	204	0.9	0.7	0.8	-1.1	-0.6	-0.85
592	DTP	126405	232	-0.2	-0.5	-0.35	-1.5	-1.5	-1.5
593	DTP	50572	248	-0.2	-0.7	-0.45	-1.9	-0.8	-1.35
594	DTP	118723	239	-0.7	0.5	-0.1	-0.7	-0.4	-0.55
595	DTP	129260	241	-1.3	-0.6	-0.95	-0.7	0.5	-0.1
596	DTP	143348	243	-0.9	-0.1	-0.5	-0.3	-0.1	-0.2
597	DTP	152551	236	-1.5	-1.8	-1.65	-0.9	-0.2	-0.55
598	DTP	159031	223	-1.7	-1.5	-1.6	-1.2	-1.1	-1.15
599	DTP	166583	219	0.3	0.5	0.4	-1.4	-0.9	-1.15
600	DTP	177989	237	-1.3	-2.3	-1.8	-1.9	-1.1	-1.5
601	DTP	204920	226	-1.7	-1	-1.35	1.4	0.8	1.1
602	DTP	236246	233	-0.5	0.8	0.15	1.1	0.9	1
603	DTP	282187	248	-0.8	0.3	-0.25	0.1	-0.1	0
604	DTP	293780	209	-0.8	3.2	1.2	-0.6	0.1	-0.25
605	DTP	130872	236	-0.9	0.3	-0.3	1	0.9	0.95
606	DTP	144958	242	-0.2	0.8	0.3	1	0.4	0.7
607	DTP	153330	220	-0.7	0.7	0	1.2	0.8	1
608	DTP	159632	236	-0.8	0.1	-0.35	0.4	-2.1	-0.85
609	DTP	170001	206	-0.5	0.7	0.1	0	1.3	0.65
610	DTP	179818	214	1.1	1.5	1.3	0.8	-0.5	0.15
611	DTP	204976	212	-2	0	-1	0.8	-0.4	0.2
612	DTP	240502	206	-1	0.1	-0.45	1.2	0.5	0.85
613	DTP	284234	245	-0.1	0	-0.05	-1.3	-0.5	-0.9
614	DTP	294154	212	0.6	1.3	0.95	-0.4	-0.7	-0.55
615	DTP	131388	209	-0.3	-0.1	-0.2	0.9	0.8	0.85
616	DTP	144982	226	0.2	1.1	0.65	1.7	1.3	1.5
617	DTP	153365	249	1.2	1.2	1.2	1.7	1.1	1.4
618	DTP	163144	211	0.5	1.1	0.8	1.9	0.9	1.4
619	DTP	170578	245	-0.6	1.1	0.25	0.2	0.8	0.5
620	DTP	182400	233	-0.2	-1.2	-0.7	0.3	-0.1	0.1
621	DTP	205843	244	-1.6	-0.1	-0.85	1.6	0.9	1.25
622	DTP	255025	226	0.7	1	0.85	1.7	0.8	1.25
623	DTP	288519	240	1.5	2.3	1.9	-0.1	-0.9	-0.5
624	DTP	294161	238	1.1	0.2	0.65	0.1	0.3	0.2
625	DTP	131986	208	-0.6	0.5	-0.05	1.3	1.9	1.6
626	DTP	148170	227	1	0.6	0.8	2	1	1.5
627	DTP	153399	237	1.7	1.9	1.8	2.2	1	1.6
628	DTP	164208	220	1.9	1.5	1.7	0.8	0.9	0.85
629	DTP	170621	202	-0.1	0.2	0.05	0.2	1	0.6
630	DTP	190336	244	0	-0.2	-0.1	0.7	0.8	0.75
631	DTP	210816	243	-1.4	1	-0.2	2	1.1	1.55
632	DTP	261037	201	0.6	0.5	0.55	1	0.7	0.85
633	DTP	289090	246	0.1	1.1	0.6	-0.3	-1.1	-0.7
634	DTP	294623	242	1.1	1.5	1.3	-0.1	-0.1	-0.1
635	DTP	133195	229	0.4	-0.1	0.15	1.9	1.3	1.6
636	DTP	149046	228	0.2	1	0.6	2.3	1.2	1.75
637	DTP	154295	231	0.6	2.1	1.35	1.9	1.9	1.9
638	DTP	164511	206	1.3	0.4	0.85	1.5	1.3	1.4
639	DTP	174027	212	0.5	1.4	0.95	0	1.2	0.6
640	DTP	193043	221	0.9	-0.2	0.35	0.4	-0.6	-0.1
641	DTP	215276	206	-1.3	-0.1	-0.7	0.6	1.1	0.85
642	DTP	261610	218	0.7	0.9	0.8	0.6	1.1	0.85
643	DTP	289365	250	0.8	1.4	1.1	0.3	0.4	0.35
644	DTP	295404	230	0.9	0.4	0.65	0.1	0.3	0.2
645	DTP	133356	214	0.5	0.4	0.45	2.2	1.9	2.05
646	DTP	149286	236.27	2.5	0.7	1.6	-0.6	-1.2	-0.9
647	DTP	156616	215	0.8	1.6	1.2	3.1	2.2	2.65
648	DTP	164678	203	0.3	0.9	0.6	1.2	1.3	1.25
649	DTP	175412	238	-0.7	0.1	-0.3	0.5	1.1	0.8
650	DTP	196148	201	0.9	-0.4	0.25	0.4	0.7	0.55
651	DTP	220030	217	-0.6	0.5	-0.05	0.5	1	0.75
652	DTP	274905	221	0.8	-0.2	0.3	0.6	0.3	0.45
653	DTP	290307	210	1.2	0.9	1.05	0.8	0.7	0.75
654	DTP	298197	221	-1.1	-0.4	-0.75	-1	-1.4	-1.2
655	DTP	139257	235	-0.3	0.5	0.1	0.8	0.4	0.6
656	DTP	150954	231	-1.3	-1	-1.15	-0.5	-1.5	-1
657	DTP	157767	211	-0.2	0.7	0.25	1.7	1.6	1.65
658	DTP	165883	227	0.1	0.3	0.2	1.1	1.4	1.25
659	DTP	175415	216	0.1	0.8	0.45	1.1	1.2	1.15
660	DTP	197049	221	0.1	-0.4	-0.15	0.6	0.1	0.35
661	DTP	227383	211	-0.8	-0.3	-0.55	0.4	0.8	0.6
662	DTP	277806	230	-0.2	0.4	0.1	1	1	1
663	DTP	292826	250	0.6	-0.9	-0.15	1.3	1.2	1.25
664	DTP	298793	233	-0.7	0.2	-0.25	-1.7	0	-0.85
665	DTP	140892	244	-1.1	-0.7	-0.9	1.3	1.4	1.35
666	DTP	152393	214	0.2	-0.4	-0.1	1	1.1	1.05
667	DTP	157940	250	-0.7	-0.2	-0.45	1	0.7	0.85
668	DTP	166547	229	-1.8	-1.3	-1.55	-0.8	0.8	0
669	DTP	176765	217	-2.5	-1.2	-1.85	0.1	-0.1	0
670	DTP	202883	203	-0.9	-1.6	-1.25	-1.8	-0.3	-1.05
671	DTP	234945	223	-2.3	-1.4	-1.85	0.9	0.7	0.8
672	DTP	279895	236	-0.7	-0.8	-0.75	0.8	0.7	0.75
673	DTP	293334	210	-0.3	-0.5	-0.4	0.9	0.3	0.6
674	DTP	301168	236	0.1	-0.8	-0.35	-0.2	0.6	0.2
675	DTP	309971	242	-0.8	0	-0.4	-1	-1.3	-1.15
676	DTP	330497	206	-0.5	-0.1	-0.3	1	1.1	1.05
677	DTP	343783	238	-1.5	-1	-1.25	1.4	1.3	1.35
678	DTP	372221	230	-0.7	-0.5	-0.6	1.2	0.9	1.05
679	DTP	403374	229	-1.6	-1.6	-1.6	0.5	0.2	0.35
680	DTP	479	267	-1.7	-1.5	-1.6	1.1	1	1.05
681	DTP	6137	263	-0.4	0.4	0	1.5	1.3	1.4
682	DTP	7745	268	0.5	0.2	0.35	1	0.7	0.85
683	DTP	10865	260	0.2	0.1	0.15	0.9	0.1	0.5
684	DTP	11912	274	-1.4	-1	-1.2	0.5	-0.1	0.2
685	DTP	311074	226	-0.3	0.8	0.25	1.8	1.8	1.8
686	DTP	332473	220	0.8	1.2	1	1.2	0.6	0.9
687	DTP	353451	243	0.9	0.9	0.9	0.7	0.5	0.6
688	DTP	373427	245	1	1.2	1.1	1.3	0.4	0.85
689	DTP	503425	202	0.8	-0.2	0.3	0.8	1.6	1.2
690	DTP	1847	262	0	-0.7	-0.35	0.6	1.4	1
691	DTP	6145	286	0.6	0.7	0.65	1.5	1.3	1.4
692	DTP	7867	294	1.2	1.5	1.35	0.6	1.3	0.95
693	DTP	11023	268	1.7	1.7	1.7	1.3	0.7	1
694	DTP	12028	286	1	1.1	1.05	0.5	0.7	0.6
695	DTP	311727	240
696	DTP	335048	239	1.4	2.2	1.8	2.1	1.3	1.7
697	DTP	357683	223	2	-0.4	0.8	0.4	-0.5	-0.05
698	DTP	373535	232	1.5	2	1.75	-0.1	0	-0.05
699	DTP	509563	243	1.6	1.2	1.4	1.9	1.7	1.8
700	DTP	3076	265.32	0.2	-0.2	0	0.7	1.7	1.2
701	DTP	6731	254	0.6	1.3	0.95	0.7	0.4	0.55
702	DTP	7962	284	1.8	1.2	1.5	1.3	1.3	1.3
703	DTP	11275	266	2	1.6	1.8	1.3	1.4	1.35
704	DTP	12488	271	1.7	1.4	1.55	1.3	0.9	1.1
705	DTP	319034	229	-0.3	1.2	0.45	1	1.2	1.1
706	DTP	338106	240	3.1	4.1	3.6	1.7	0.8	1.25
707	DTP	366807	223	1.3	-0.7	0.3	0.8	-0.1	0.35
708	DTP	375392	210	1.7	1.7	1.7	0.1	-0.2	-0.05
709	DTP	515893	238	1.8	1.6	1.7	0.5	0.6	0.55
710	DTP	3193	270	0.5	-0.5	0	1.3	1.9	1.6
711	DTP	6821	289	-0.1	0.8	0.35	0.6	0.9	0.75
712	DTP	8816	252	1.5	1.5	1.5	1.2	1.2	1.2
713	DTP	11276	266	1.4	1.6	1.5	0.8	1	0.9
714	DTP	12633	275	1.7	2.1	1.9	0.8	0.7	0.75
715	DTP	321506	245	0.1	1.7	0.9	1.5	0.4	0.95
716	DTP	341074	241	1.8	1.8	1.8	0.1	0	0.05
717	DTP	367428	220	-0.7	0.6	-0.05	1.1	0.1	0.6
718	DTP	375997	241	1.5	1.3	1.4	0.7	2.2	1.45
719	DTP	601351	240.26	1.3	1.3	1.3	0.6	1.7	1.15
720	DTP	3247	275	0.7	-0.3	0.2	1	1.8	1.4
721	DTP	6844	292.29	0.1	1.2	0.65	0.8	0.8	0.8
722	DTP	9782	282	1.1	1.4	1.25	0.7	0.8	0.75
723	DTP	11296	286	2	1.7	1.85	1	0.4	0.7
724	DTP	647136	238	2.4	1.4	1.9	0.5	0	0.25
725	DTP	327693	248	0.1	0.7	0.4	0.9	-0.3	0.3
726	DTP	343230	226	1.3	1.7	1.5	0.5	2.2	1.35
727	DTP	367487	205	1.8	1.6	1.7	0.3	-0.2	0.05
728	DTP	379639	245	1.4	1.6	1.5	2	1.3	1.65
729	DTP	646976	233	1.2	1.1	1.15	1.6	1.7	1.65
730	DTP	4429	296.29	0.5	-0.3	0.1	1.1	1.8	1.45
731	DTP	7218	293	-1.5	-0.4	-0.95	0.3	0.1	0.2
732	DTP	10173	278	0.9	1.5	1.2	0.8	1	0.9
733	DTP	11624	277	1.6	1	1.3	0.5	0.8	0.65
734	DTP	154587	219	1.2	1.3	1.25	0.4	0.4	0.4
735	DTP	329284	212	0	0.9	0.45	0.2	0.3	0.25
736	DTP	343343	224	0.5	1.1	0.8	1	-0.4	0.3
737	DTP	370367	211	1.2	0.8	1	1.3	0.1	0.7
738	DTP	382059	220	0.4	0.8	0.6	0.4	2	1.2
739	DTP	659107	244	0.2	-0.6	-0.2	1.6	-0.4	0.6
740	DTP	5426	258.23	-3.8	-4.1	-3.95	-0.8	1.1	0.15
741	DTP	7420	298	0.4	1.2	0.8	0.7	0.2	0.45
742	DTP	10211	287	0.9	1.3	1.1	0.4	0	0.2
743	DTP	11643	288	1.2	1.1	1.15	0.1	0.1	0.1
744	DTP	306752	238	0.7	0.6	0.65	0	0	0
745	DTP	329676	214	-1.5	-0.2	-0.85	1.1	1.1	1.1
746	DTP	343344	204	0	0	0	1.5	0.8	1.15
747	DTP	372134	243	0	-0.2	-0.1	1.7	1.4	1.55
748	DTP	402843	244	-1	-0.9	-0.95	1.6	0.9	1.25
749	DTP	660300	249	-1.1	-1	-1.05	1.3	0.5	0.9
750	DTP	5564	275	-1.2	-1.7	-1.45	1.6	-0.1	0.75
751	DTP	7572	278	-0.5	0	-0.25	0	0.2	0.1
752	DTP	10768	255	0.2	0.1	0.15	0.1	-0.3	-0.1
753	DTP	11664	295	-0.6	-0.4	-0.5	-0.4	-0.4	-0.4
754	DTP	403379	203.2	-0.2	0	-0.1	-0.7	-0.4	-0.55
755	DTP	12644	289	0.7	0.2	0.45	1.6	0.8	1.2
756	DTP	13785	267	0.6	0.6	0.6	0.4	0.1	0.25
757	DTP	15784	266	0	0.3	0.15	1.2	0.5	0.85
758	DTP	19824	275.35	-1.4	-0.5	-0.95	-0.4	-1.5	-0.95
759	DTP	21710	277	-1	-0.4	-0.7	-0.5	-0.8	-0.65
760	DTP	29073	276	-1.1	-1.7	-1.4	-0.4	-0.3	-0.35
761	DTP	33173	269	-0.9	0.5	-0.2	0	1	0.5
762	DTP	37612	269.34	0.3	-0.1	0.1	0.2	-0.4	-0.1
763	DTP	40749	290	-0.3	-0.2	-0.25	-0.9	-1.4	-1.15
764	DTP	43308	288	-0.3	-1.5	-0.9	-2	-2.2	-2.1
765	DTP	12646	267	0.7	1.7	1.2	0.9	0.8	0.85
766	DTP	13800	254	1.4	1.1	1.25	0.3	1.5	0.9
767	DTP	17055	280	1.5	1.2	1.35	0.3	0	0.15
768	DTP	19962	274	0.7	1.6	1.15	0	0.2	0.1
769	DTP	22801	280	0.2	1.1	0.65	0.7	-0.5	0.1
770	DTP	30813	272	0.9	-0.8	0.05	-0.6	-1.1	-0.85
771	DTP	34875	272	0.6	0.9	0.75	0.5	0.1	0.3
772	DTP	37955	261	1.5	1.5	1.5	0.6	0.3	0.45
773	DTP	41066	286	1.8	0.9	1.35	0.1	-1.2	-0.55
774	DTP	43344	300	0.4	1.3	0.85	0.1	-0.5	-0.2
775	DTP	13151	259	0.8	0.7	0.75	0.6	0.3	0.45
776	DTP	14311	263	1.8	2.5	2.15	2.4	1.4	1.9
777	DTP	17148	286	0.8	1.4	1.1	1.2	1	1.1
778	DTP	20618	258	1.6	1.2	1.4	0.3	0.6	0.45
779	DTP	22806	262	0.6	1.4	1	0.4	0.8	0.6
780	DTP	30930	267.28	0.5	1.4	0.95	-0.1	0.3	0.1
781	DTP	34879	267	-0.2	2.3	1.05	2.1	1.3	1.7
782	DTP	38007	256	-1.1	0.6	-0.25	0.4	-0.4	0
783	DTP	41376	278	0.3	0.9	0.6	-0.9	0	-0.45
784	DTP	43409	266	0.6	0.9	0.75	-0.1	0.3	0.1
785	DTP	13248	290	-0.9	-2.6	-1.75	1.4	1.2	1.3
786	DTP	14380	266	0.6	1	0.8	1.4	1.3	1.35
787	DTP	17362	266	1.1	0.8	0.95	0.8	0.7	0.75
788	DTP	20619	258	1.1	0.7	0.9	0.4	0.7	0.55
789	DTP	22881	266	0.1	1.2	0.65	0.7	0.7	0.7
790	DTP	31069	297	1	0.9	0.95	0.2	0.2	0.2
791	DTP	34910	291	0.3	1.5	0.9	1	0.6	0.8
792	DTP	38352	295	1.5	1.5	1.5	1.5	1.1	1.3
793	DTP	41378	277	1.9	1.9	1.9	-0.1	0.5	0.2
794	DTP	44556	287	1.1	1.9	1.5	0.5	-0.2	0.15
795	DTP	13345	254	0.7	0.9	0.8	0.5	1.5	1
796	DTP	14396	284	0.6	2.1	1.35	1.9	1.9	1.9
797	DTP	17507	253	1.8	1.6	1.7	2.1	1.5	1.8
798	DTP	21333	260	1.4	2.4	1.9	1.8	1.3	1.55
799	DTP	25678	277.32	0.6	1.2	0.9	2.4	1.2	1.8
800	DTP	31698	265	0.8	0.1	0.45	-0.6	0.2	-0.2
801	DTP	36586	270.24	-0.1	0.4	0.15	-0.7	-0.2	-0.45
802	DTP	39047	256	2.1	1.6	1.85	-0.9	-1.1	-1
803	DTP	41649	260	1.7	1.5	1.6	0.1	0.6	0.35
804	DTP	45086	261	1.2	2.3	1.75	0.4	-0.4	0
805	DTP	13434	269	1	1.6	1.3	0.1	1.4	0.75
806	DTP	14398	299
807	DTP	19125	276	-1.4	1.9	0.25	1.4	1.8	1.6
808	DTP	21603	290	1.2	0.4	0.8	2.9	3.1	3
809	DTP	25740	298.32	0.5	1.6	1.05	1.6	1.3	1.45
810	DTP	31703	295	0.4	0.8	0.6	1.5	0.2	0.85
811	DTP	36753	274	0.2	1.3	0.75	1.4	-0.7	0.35
812	DTP	39938	281	1.6	2	1.8	0.2	-0.5	-0.15
813	DTP	41805	300	0.5	1.4	0.95	-0.3	1.2	0.45
814	DTP	45536	266	0.2	-0.1	0.05	1.3	1.3	1.3
815	DTP	13579	268	0.7	1.4	1.05	-0.2	1.2	0.5
816	DTP	15358	293	1.2	1.3	1.25	0.8	0.9	0.85
817	DTP	19136	273.72	1.1	0.7	0.9	1.7	0.2	0.95
818	DTP	21683	292	0.9	1.8	1.35	0.7	1.4	1.05
819	DTP	26692	296.33	0.6	1.9	1.25	1.6	0.5	1.05
820	DTP	32892	278	0.7	-0.5	0.1	1.1	1.6	1.35
821	DTP	36815	264	0.1	0.9	0.5	1.3	0.3	0.8
822	DTP	40275	263	1.3	1.4	1.35	0.7	0.8	0.75
823	DTP	42096	294	1.2	1.4	1.3	0.2	0.3	0.25
824	DTP	45745	261	1	1.6	1.3	0.3	-0.2	0.05
825	DTP	13658	264	-0.3	0.3	0	0	2.3	1.15
826	DTP	15359	264	0.9	0.4	0.65	1.2	0.8	1
827	DTP	19141	288	0.8	0.3	0.55	1.6	1.1	1.35
828	DTP	21709	279	0.4	-0.6	-0.1	1.1	0.9	1
829	DTP	28377	269	-1.8	0.2	-0.8	0.1	1.4	0.75
830	DTP	33010	253	-1.1	-1.2	-1.15	0.7	-0.1	0.3
831	DTP	37433	256.26	-0.9	0.1	-0.4	-1.2	-1.9	-1.55
832	DTP	40306	298	0.4	0.8	0.6	0.3	0.7	0.5
833	DTP	42135	280	0.7	0.5	0.6	0.4	0.4	0.4
834	DTP	45815	264	0.7	-0.4	0.15	0.2	-0.2	0
835	DTP	46212	298	0	-0.5	-0.25	0.8	-0.5	0.15
836	DTP	52241	284	-0.3	0.3	0	0.5	-0.1	0.2
837	DTP	59430	284	-1.2	0.1	-0.55	0.7	-0.1	0.3
838	DTP	66020	260	-0.5	-0.6	-0.55	0.9	-0.5	0.2
839	DTP	76549	261	-1.1	-1.7	-1.4	-2.5	-0.6	-1.55
840	DTP	88324	251	-0.9	-1	-0.95	-1.1	0	-0.55
841	DTP	92937	261	-0.3	0.1	-0.1	2.2	0.5	1.35
842	DTP	100058	287	-0.7	0.4	-0.15	0.4	1.8	1.1
843	DTP	105432	284	0.7	1	0.85	1.4	1.2	1.3
844	DTP	112965	271	-1	-0.4	-0.7	-1	-1.2	-1.1
845	DTP	47522	255	0.6	0.6	0.6	-0.1	1.4	0.65
846	DTP	54645	283	0.4	1.6	1	0.2	0	0.1
847	DTP	59782	252	0.4	0.4	0.4	1.2	0.3	0.75
848	DTP	68841	267	0.2	0	0.1	0	0.9	0.45
849	DTP	76747	272	-0.7	-0.4	-0.55	-0.4	-0.5	-0.45
850	DTP	88349	254	0.1	-0.7	-0.3	-0.2	0	-0.1
851	DTP	93427	286	2	1.6	1.8	3.1	2.8	2.95
852	DTP	100942	274	0.6	0.9	0.75	2.1	1.5	1.8
853	DTP	107022	278	1.5	2.2	1.85	2	1.2	1.6
854	DTP	116640	295	-0.5	0.1	-0.2	-1.3	-1.6	-1.45
855	DTP	49643	292	-0.2	0.6	0.2	1.3	1.6	1.45
856	DTP	54860	289	1.4	0.9	1.15	0.8	1.4	1.1
857	DTP	59984	265	1.5	0.6	1.05	0.4	0.9	0.65
858	DTP	68971	273	1.6	1.3	1.45	1.1	0.7	0.9
859	DTP	78623	292	0.9	1.4	1.15	0	-0.2	-0.1
860	DTP	88402	292	0.2	-1	-0.4	-0.3	0	-0.15
861	DTP	93945	262	0.3	1	0.65	0.7	0.7	0.7
862	DTP	101298	269	1.2	1.5	1.35	1.5	1.6	1.55
863	DTP	108783	272	-0.7	0.6	-0.05	-0.1	0	-0.05
864	DTP	58347	281	0.6	1.5	1.05	1.9	1.5	1.7
865	DTP	49847	274	0.1	1.4	0.75	1.5	1.2	1.35
866	DTP	55172	285	1.3	2.3	1.8	1.4	0.7	1.05
867	DTP	60037	286	1.8	1.8	1.8	2.1	1.3	1.7
868	DTP	70307	267	1.1	2.3	1.7	0.5	1	0.75
869	DTP	78697	264	0.9	1	0.95	0.3	0.8	0.55
870	DTP	88795	253	0.8	-1.1	-0.15	0.1	-0.1	0
871	DTP	95909	266	0.3	1.1	0.7	0.9	1	0.95
872	DTP	101345	265	1	2.4	1.7	0.2	2.2	1.2
873	DTP	109747	263	1.4	0.7	1.05	0.1	0	0.05
874	DTP	53934	295	1.5	1.9	1.7	0.9	2	1.45
875	DTP	50199	260	-1.6	-0.5	-1.05	1.3	0.5	0.9
876	DTP	55453	272	1.4	1.9	1.65	1.5	1.5	1.5
877	DTP	60303	278.69	1.9	2.6	2.25	1.6	1.2	1.4
878	DTP	72947	282	1.8	1.5	1.65	0.9	1	0.95
879	DTP	79887	298	0.8	0.7	0.75	0.4	0.9	0.65
880	DTP	89349	284	-0.9	-1.2	-1.05	-0.9	0.5	-0.2
881	DTP	97865	277	0.3	1	0.65	1.8	1.5	1.65
882	DTP	101679	273	1.3	1.5	1.4	1.1	1.3	1.2
883	DTP	110899	254	1	1.4	1.2	1.8	0.9	1.35
884	DTP	66122	284	1.1	1.8	1.45	1.4	0.8	1.1
885	DTP	50680	293	0.6	1	0.8	-0.7	-0.4	-0.55
886	DTP	55845	285	-0.2	0.3	0.05	0.6	1	0.8
887	DTP	61929	294	0.9	1.1	1	1.1	0.3	0.7
888	DTP	73295	252	1.5	1	1.25	0.2	0.1	0.15
889	DTP	82269	272	-0.5	-0.4	-0.45	-0.3	-0.9	-0.6
890	DTP	89429	296	0.8	-0.6	0.1	-0.5	0	-0.25
891	DTP	98026	300	0.4	1.2	0.8	1	1.2	1.1
892	DTP	101758	259	1.4	1	1.2	1.5	1.6	1.55
893	DTP	111847	263	-0.4	-0.4	-0.4	0.3	0.2	0.25
894	DTP	23715	265	1.6	1.5	1.55	1.1	1.7	1.4
895	DTP	51349	283	0.2	1.4	0.8	1.4	1.3	1.35
896	DTP	55862	298	1.4	1.4	1.4	1.1	0.5	0.8
897	DTP	62901	259	0.1	1.2	0.65	0.3	-0.2	0.05
898	DTP	73753	289	1	1.3	1.15	-0.3	0.4	0.05
899	DTP	87008	293.43	1	1.9	1.45	0.6	0.5	0.55
900	DTP	89759	258	1	-0.3	0.35	-0.3	-0.5	-0.4
901	DTP	98049	262	0.6	1	0.8	2.1	1.4	1.75
902	DTP	102554	263	0.4	1.2	0.8	1	1.1	1.05
903	DTP	112541	292	1.7	1.2	1.45	1.5	1.3	1.4
904	DTP	33182	276	0.8	0.9	0.85	-0.6	0.7	0.05
905	DTP	51351	284	-0.5	-0.2	-0.35	0.7	-0.5	0.1
906	DTP	58724	256	0.1	0.4	0.25	0.2	0.5	0.35
907	DTP	63161	264	0	0.4	0.2	0.7	0.4	0.55
908	DTP	76478	287	1.3	1.5	1.4	-1.9	-1.6	-1.75
909	DTP	87690	271	-1	-0.2	-0.6	-0.1	0.4	0.15
910	DTP	92849	278	-1.1	-1.4	-1.25	-1	-0.7	-0.85
911	DTP	98938	280	1.6	1.8	1.7	-1.1	-1.5	-1.3
912	DTP	103189	299	0.3	0.6	0.45	0.1	0.5	0.3
913	DTP	112547	298	0	-0.6	-0.3	0.4	0.1	0.25
914	DTP	116508	276	-0.4	-1.5	-0.95	-1.1	0.3	-0.4
915	DTP	116644	270	-0.5	0.1	-0.2	0.4	-0.4	0
916	DTP	120961	280	-0.6	-1.4	-1	-2	-0.9	-1.45
917	DTP	127886	278.31	-0.7	-0.2	-0.45	-0.1	-1.8	-0.95
918	DTP	134199	294	-1.4	-1.1	-1.25	1.1	1.2	1.15
919	DTP	139021	255	1	0.8	0.9	-3.1	-1.1	-2.1
920	DTP	149312	266	-0.6	-0.7	-0.65	0.6	-0.4	0.1
921	DTP	159686	257	0.1	0.4	0.25	-1.5	-0.5	-1
922	DTP	166634	267	-0.8	-0.3	-0.55	-2.2	-1	-1.6
923	DTP	176367	257	-1.2	-1.3	-1.25	0.2	-0.9	-0.35
924	DTP	203837	267	0.8	1.3	1.05	-0.9	-0.3	-0.6
925	DTP	117197	299	0.8	0	0.4	-1.1	-2.3	-1.7
926	DTP	121182	266	0.2	0.2	0.2	-0.2	0.6	0.2
927	DTP	129220	285	-0.8	-0.8	-0.8	-1.7	-1.5	-1.6
928	DTP	134674	257	0	0.4	0.2	0.8	-0.1	0.35
929	DTP	140873	277.71	-0.9	-1.1	-1	0.4	0.9	0.65
930	DTP	151262	285	0.8	-0.5	0.15	0.1	-2.1	-1
931	DTP	162188	275	1.3	1.1	1.2	-0.4	0.2	-0.1
932	DTP	166846	266	0.6	0.4	0.5	-0.3	-1	-0.65
933	DTP	178873	268	0.3	-1.1	-0.4	-0.8	-0.6	-0.7
934	DTP	205909	290	0.1	0.2	0.15	-0.4	-1.7	-1.05
935	DTP	117446	261	1.5	1.3	1.4	0.2	-0.1	0.05
936	DTP	121268	272	1.1	0.7	0.9	-1.3	0.6	-0.35
937	DTP	129929	266	-0.3	0.2	-0.05	-1.8	-1.8	-1.8
938	DTP	135412	288	0.5	1.2	0.85	-0.6	-1.1	-0.85
939	DTP	140899	268	0.4	-1	-0.3	-0.1	0	-0.05
940	DTP	153172	272	1.2	1.9	1.55	0.1	-1.7	-0.8
941	DTP	163802	258	1.7	1.4	1.55	-1.7	0.7	-0.5
942	DTP	168221	286	-0.7	-0.1	-0.4	0.6	1.1	0.85
943	DTP	179822	260	1.1	0	0.55	-1.2	-0.4	-0.8
944	DTP	205913	262	0.1	-0.3	-0.1	-0.4	-0.4	-0.4
945	DTP	117908	286	0	0.5	0.25	-0.6	-0.7	-0.65
946	DTP	122253	290	1.4	0	0.7	1.3	-1.6	-0.15
947	DTP	130801	280.33	1.7	0.2	0.95	-1	-1	-1
948	DTP	135894	269	1.4	1.1	1.25	-1.1	1.4	0.15
949	DTP	141538	296	0.7	-0.7	0	-1.1	-2.1	-1.6
950	DTP	153792	269	0.8	1	0.9	-0.8	-1.1	-0.95
951	DTP	164464	275	0	1.1	0.55	-0.9	-2.1	-1.5
952	DTP	168225	278	0.2	0.8	0.5	0.2	0.5	0.35
953	DTP	180964	274	1.2	0.5	0.85	0.9	0.7	0.8
954	DTP	207895	279.25	0.1	0.1	0.1	-1.4	-0.5	-0.95
955	DTP	118628	288	0.6	1.8	1.2	1	0.6	0.8
956	DTP	122385	270	1.6	1.2	1.4	0.5	-0.2	0.15
957	DTP	130847	289	1.5	1.6	1.55	0.1	-0.8	-0.35
958	DTP	137399	273	0.9	0.9	0.9	1.3	0.9	1.1
959	DTP	142269	273	0.5	-0.9	-0.2	-0.5	-1.9	-1.2
960	DTP	154127	281	-0.3	0.6	0.15	0.3	-0.1	0.1
961	DTP	164880	291	1.3	1.2	1.25	1.3	0	0.65
962	DTP	170637	256	0.9	0.4	0.65	-0.4	0.7	0.15
963	DTP	193528	272	0.2	0.8	0.5	0.1	0.6	0.35
964	DTP	211336	273	0.5	0.3	0.4	-0.8	-0.4	-0.6
965	DTP	119805	295	0.4	1.5	0.95	1.1	0.7	0.9
966	DTP	125344	281	1	0.9	0.95	0.4	1.8	1.1
967	DTP	133002	259	1.3	1.3	1.3	1.5	0.5	1
968	DTP	137577	275	0.9	1	0.95	0.2	-0.4	-0.1
969	DTP	144694	274	0.2	-1.1	-0.45	-0.8	-1.6	-1.2
970	DTP	156957	263	-0.8	0.6	-0.1	0.1	0.1	0.1
971	DTP	165599	287	0	-0.5	-0.25	-0.4	0.6	0.1
972	DTP	170955	291	0.7	1.2	0.95	-1.8	-1.1	-1.45
973	DTP	195327	271	-0.2	0.2	0	-0.4	-0.4	-0.4
974	DTP	213708	253	0.5	0.3	0.4	0.7	0.3	0.5
975	DTP	120631	258	0.4	0.7	0.55	-0.9	-1.4	-1.15
976	DTP	125605	257	0.4	-0.3	0.05	0	-0.2	-0.1
977	DTP	133351	290	-0.2	-0.4	-0.3	1	1.3	1.15
978	DTP	138389	253	0.3	0.7	0.5	-0.7	-0.9	-0.8
979	DTP	147866	282	0.4	-1	-0.3	-1	-1.5	-1.25
980	DTP	157522	275	-1	0.2	-0.4	-0.1	-0.4	-0.25
981	DTP	165701	295.4	0.4	0.3	0.35	-0.6	0.4	-0.1
982	DTP	174084	295	0.3	0	0.15	-1.3	-0.8	-1.05
983	DTP	197046	252	-0.5	-0.3	-0.4	0.2	0.2	0.2
984	DTP	214029	265	0.5	-0.1	0.2	-0.5	-0.4	-0.45
985	DTP	120913	262	-1.7	-1.3	-1.5	1.1	0	0.55
986	DTP	126224	265	-1.4	-1.4	-1.4	-1	-0.6	-0.8
987	DTP	134058	251	-1.3	-1.4	-1.35	-1.4	-0.8	-1.1
988	DTP	138398	289	-2.2	-1.3	-1.75	0.3	0.8	0.55
989	DTP	148832	264	-1.1	-1.4	-1.25	-1.9	-1.6	-1.75
990	DTP	158549	260	-1.8	-1.2	-1.5	-0.6	-1.1	-0.85
991	DTP	166596	268	-0.9	-1.2	-1.05	-0.6	0.2	-0.2
992	DTP	175743	268.32	-1.3	-1.5	-1.4	-0.7	-0.9	-0.8
993	DTP	201634	274	-1.1	-1.3	-1.2	-0.7	-0.4	-0.55
994	DTP	215275	296	-1.4	-1.7	-1.55	-1.2	-1.1	-1.15
995	DTP	215585	266	-0.2	-1.8	-1	1.2	-0.2	0.5
996	DTP	241998	294	-1.3	-0.2	-0.75	-0.7	0.8	0.05
997	DTP	288024	297	-1.7	-0.7	-1.2	0.1	0.3	0.2
998	DTP	299968	270	-0.5	-2.5	-1.5	0.4	-0.6	-0.1
999	DTP	308814	283	-0.3	0.7	0.2	0.6	0.9	0.75
1000	DTP	319436	299	-0.7	-1.1	-0.9	-1.6	-0.7	-1.15
1001	DTP	331972	263	0.6	-0.3	0.15	1.6	1.5	1.55
1002	DTP	352888	279.34	-0.2	-0.9	-0.55	1.1	1	1.05
1003	DTP	367416	282	-5.4	-5.8	-5.6	-0.3	-0.4	-0.35
1004	DTP	177866	259.1	0.8	1	0.9	0.7	-0.7	0
1005	DTP	216183	289	-1.1	-0.3	-0.7	0.4	0.5	0.45
1006	DTP	242557	282	-0.2	1.9	0.85	-4.2	-4.6	-4.4
1007	DTP	289748	262	-0.1	0.9	0.4	0.4	2.5	1.45
1008	DTP	301167	272	0	-0.1	-0.05	0.9	0.8	0.85
1009	DTP	310113	278	0.5	0.1	0.3	1.5	1.6	1.55
1010	DTP	319471	252	1	0	0.5	1.2	0.5	0.85
1011	DTP	332452	286	-0.6	0	-0.3	0	-0.8	-0.4
1012	DTP	358311	271	0.3	0.6	0.45	1.3	2.1	1.7
1013	DTP	367474	281	0.1	0.2	0.15	-0.7	-1.4	-1.05
1014	DTP	299967	287	0.7	0.7	0.7	0.1	0.4	0.25
1015	DTP	216618	265	0.1	0.9	0.5	0	-0.2	-0.1
1016	DTP	265372	264	0.7	1.1	0.9	0.2	1.2	0.7
1017	DTP	294150	291	1	0.4	0.7	0.9	0.1	0.5
1018	DTP	302584	278	1.6	0.4	1	0.3	0.2	0.25
1019	DTP	311165	285	0.6	0	0.3	1.1	0.8	0.95
1020	DTP	321792	254	1.2	0.7	0.95	-0.1	0.7	0.3
1021	DTP	338564	277	0	1.2	0.6	0.7	0	0.35
1022	DTP	361570	283	0.5	1.6	1.05	0.9	2	1.45
1023	DTP	367480	298	1.2	1.7	1.45	-0.4	0.2	-0.1
1024	DTP	217306	290	0	1	0.5	2.4	0.7	1.55
1025	DTP	236254	266	0.6	1.1	0.85	0.7	0.7	0.7
1026	DTP	269904	299	0.6	0.7	0.65	1.7	2	1.85
1027	DTP	294153	288	0.7	1.3	1	0.5	0	0.25
1028	DTP	302867	288
1029	DTP	312606	284	0.3	0.8	0.55	1.3	1.8	1.55
1030	DTP	326644	269	0.5	-0.1	0.2	1.3	0.2	0.75
1031	DTP	343526	265	-0.5	1.2	0.35	1.1	2.1	1.6
1032	DTP	362093	275	0.8	1	0.9	1.2	1	1.1
1033	DTP	369066	269	1.8	1.4	1.6	-0.1	-0.1	-0.1
1034	DTP	204939	295	1	0.7	0.85	2.2	1.5	1.85
1035	DTP	237530	294	1	0	0.5	-0.7	-0.1	-0.4
1036	DTP	276736	281	0.4	1.2	0.8	0.9	1.5	1.2
1037	DTP	294625	287	0.5	1.3	0.9	1.9	0.8	1.35
1038	DTP	303304	258	1.7	0.4	1.05	0.4	0.3	0.35
1039	DTP	316458	263.26	0.7	1.2	0.95	2.2	0.9	1.55
1040	DTP	326921	274	-0.6	-0.6	-0.6	0.5	1.1	0.8
1041	DTP	343557	281	0.6	0.3	0.45	1	0.9	0.95
1042	DTP	363801	253	-0.2	0.9	0.35	0.1	0	0.05
1043	DTP	369070	299	1.4	1.1	1.25	0.7	1.9	1.3
1044	DTP	252172	278	0.4	0.6	0.5	1.9	1.8	1.85
1045	DTP	238929	273	1.3	1.2	1.25	0.5	0.6	0.55
1046	DTP	283845	273.29	1.3	0.7	1	1.4	1.1	1.25
1047	DTP	294747	271
1048	DTP	305329	262	0	-0.7	-0.35	-1.1	-1.2	-1.15
1049	DTP	318799	262	-1.2	-0.1	-0.65	1.4	1	1.2
1050	DTP	327444	268	-2.2	-1.2	-1.7	0.2	1.3	0.75
1051	DTP	348970	258	0.4	0.9	0.65	1.2	1	1.1
1052	DTP	364889	299	1.8	1.4	1.6	1.1	1.2	1.15
1053	DTP	370383	264	0.8	2.2	1.5	0.8	-0.1	0.35
1054	DTP	280492	298	1.7	1.7	1.7	1.2	0.5	0.85
1055	DTP	240029	280	-0.1	-0.1	-0.1	1.7	2.1	1.9
1056	DTP	283856	262	-1.2	-0.2	-0.7	1.4	0.6	1
1057	DTP	296934	297	-1.2	0.9	-0.15	0.9	0.7	0.8
1058	DTP	305743	258	-1.1	-0.2	-0.65	1.2	1.5	1.35
1059	DTP	319029	288	-0.1	-1.2	-0.65	0.5	-0.1	0.2
1060	DTP	328130	261	-0.4	0.5	0.05	0.7	0.3	0.5
1061	DTP	351674	286	2.1	0.3	1.2	0.9	0.4	0.65
1062	DTP	366086	269	0.7	1.5	1.1	1.2	-1.1	0.05
1063	DTP	372769	290	0.9	1	0.95	-0.9	-0.4	-0.65
1064	DTP	331977	254	0	0.9	0.45	0.3	0.4	0.35
1065	DTP	241621	279	0	-0.5	-0.25	1.8	1.8	1.8
1066	DTP	285669	254	-0.1	0.1	0	1.3	-0.4	0.45
1067	DTP	299514	288	-0.6	-0.3	-0.45	-1.7	-1.9	-1.8
1068	DTP	307703	257	-1.9	-0.7	-1.3	0.4	0.1	0.25
1069	DTP	319079	297	-1.6	-0.2	-0.9	0.7	0	0.35
1070	DTP	330796	283	-0.4	0.4	0	0.2	1.6	0.9
1071	DTP	351691	260	-1.3	-0.7	-1	-1	0.4	-0.3
1072	DTP	366802	298	-0.1	0	-0.05	0.2	0.3	0.25
1073	DTP	374703	298	0.4	0.9	0.65	0.8	1.3	1.05
1074	DTP	228155	290.25	-0.9	-0.2	-0.55	-1.7	-1.8	-1.75
1075	DTP	374814	276	0.7	1.1	0.9	0.2	-0.5	-0.15
1076	DTP	400938	253	0.6	1.2	0.9	-1.5	-1.7	-1.6
1077	DTP	637343	276	-0.2	-0.4	-0.3	-1.5	-0.8	-1.15
1078	DTP	680515	265	1.2	1.7	1.45	-0.2	-1	-0.6
1079	DTP	9037	336.3	-3.6	-3.9	-3.75	-2.3	-0.2	-1.25
1080	DTP	13616	327.47	-0.8	-1.1	-0.95	0.2	2.6	1.4
1081	DTP	25457	348.4	1.6	1.2	1.4	-0.6	1.3	0.35
1082	DTP	32673	334	0.1	0.9	0.5	0.1	0.8	0.45
1083	DTP	35582	347	-2.7	-0.5	-1.6	-1.5	-1.5	-1.5
1084	DTP	39984	314	-0.8	-0.6	-0.7	-1.3	-0.2	-0.75
1085	DTP	375105	285	-0.8	0.8	0	-1.2	-0.4	-0.8
1086	DTP	403268	265	-1.3	-1.6	-1.45	-1.4	-1.5	-1.45
1087	DTP	637827	276	-1.8	-2	-1.9	-0.2	-0.7	-0.45
1088	DTP	1014	341	-2.1	-1.7	-1.9	-0.7	-0.4	-0.55
1089	DTP	11437	302	-0.2	-0.4	-0.3	-1.6	-1.7	-1.65
1090	DTP	14142	327	0.9	0.3	0.6	-2.3	-1.5	-1.9
1091	DTP	26113	318	-2.2	-1.4	-1.8	-0.5	-0.7	-0.6
1092	DTP	32873	305	-1.4	-1.2	-1.3	1.8	1.9	1.85
1093	DTP	36525	342.4	-0.1	0.6	0.25	0	-0.6	-0.3
1094	DTP	40269	326	1	1	1	-0.2	0.2	0
1095	DTP	378711	281	-1.8	-1.2	-1.5	-0.6	-0.8	-0.7
1096	DTP	408734	273	1.3	0.5	0.9	0.4	0.7	0.55
1097	DTP	638636	257	-1.2	-1	-1.1	1.1	0.4	0.75
1098	DTP	3753	304.36	0.2	0.4	0.3	-0.9	0.6	-0.15
1099	DTP	12262	314	0	-0.1	-0.05	-1.3	-0.6	-0.95
1100	DTP	14506	332	-0.2	-1.1	-0.65	-0.7	0	-0.35
1101	DTP	26349	302	0.7	1.9	1.3	-0.5	0.7	0.1
1102	DTP	33353	337.81	1.3	1.7	1.5	-0.4	0	-0.2
1103	DTP	36693	332.44	-2.1	-1.6	-1.85	0.2	0.2	0.2
1104	DTP	41098	312	1.5	1.5	1.5	0.2	0.6	0.4
1105	DTP	379468	296	-1.6	-0.9	-1.25	-1.2	-0.1	-0.65
1106	DTP	408860	286	-1.4	-1.1	-1.25	0.7	0.6	0.65
1107	DTP	641396	291	-0.7	-0.5	-0.6	-0.7	-1	-0.85
1108	DTP	5476	334	-1.7	-2.1	-1.9	0.8	-0.4	0.2
1109	DTP	12544	320	-2	-2	-2	0.2	-0.1	0.05
1110	DTP	17128	348	-1.9	-2	-1.95	0.9	0.2	0.55
1111	DTP	26980	334.33	1.2	2	1.6	0.8	0.8	0.8
1112	DTP	33478	328	-0.5	-1.2	-0.85	1.9	0.8	1.35
1113	DTP	36758	305.82
1114	DTP	43088	335	8.5	6.9	7.7	-1.4	0.4	-0.5
1115	DTP	379536	296	-1.9	-1.4	-1.65	0.5	0.3	0.4
1116	DTP	522131	297	-0.8	-0.6	-0.7	-0.7	-1.5	-1.1
1117	DTP	643029	280	-1.9	-1.3	-1.6	-0.3	-0.3	-0.3
1118	DTP	6101	330	-2.7	-3.1	-2.9	-0.2	0.6	0.2
1119	DTP	12628	321	-1.4	-2.6	-2	1.2	0.4	0.8
1120	DTP	18883	349	-0.7	-0.9	-0.8	-0.9	-1.2	-1.05
1121	DTP	27305	324	0.4	0.4	0.4	1	-0.2	0.4
1122	DTP	33570	321	-0.6	-0.6	-0.6	0.1	0.2	0.15
1123	DTP	36923	317	-0.3	-0.2	-0.25	0.9	-0.1	0.4
1124	DTP	43271	304	2.1	2.6	2.35	-0.1	-1.8	-0.95
1125	DTP	379651	277	0.4	1.2	0.8	-0.3	1	0.35
1126	DTP	524615	278	-0.8	-1.4	-1.1	-0.2	0.3	0.05
1127	DTP	645330	275	-0.4	0.1	-0.15	-0.8	-0.4	-0.6
1128	DTP	6268	318.33	-1.4	-2	-1.7	0.9	0.4	0.65
1129	DTP	12650	322	-1.5	-2	-1.75	1	0.1	0.55
1130	DTP	24032	310	2.2	1.5	1.85	-0.1	-0.8	-0.45
1131	DTP	28080	312	0.6	0.5	0.55	0.7	-0.2	0.25
1132	DTP	33738	339	0.3	-0.1	0.1	-0.9	-1.7	-1.3
1133	DTP	37168	308.29
1134	DTP	43506	315	1.7	-0.3	0.7	0.8	1.9	1.35
1135	DTP	380279	295	-2.1	-1.2	-1.65	0	-0.2	-0.1
1136	DTP	525721	271	-1.2	-1.1	-1.15	-0.2	0.9	0.35
1137	DTP	653004	291	-1.1	-2.1	-1.6	-0.4	-0.7	-0.55
1138	DTP	7436	304.41	-1.5	-1.6	-1.55	-0.2	-0.1	-0.15
1139	DTP	13156	314.36	1.5	1.2	1.35	0	-0.2	-0.1
1140	DTP	24951	350	2.2	1.7	1.95	0.2	0.2	0.2
1141	DTP	30205	314.39	-2.3	-1.9	-2.1	-0.7	-0.3	-0.5
1142	DTP	34219	313	-1.2	-1.6	-1.4	0.2	0.3	0.25
1143	DTP	37187	312	-0.5	-0.2	-0.35	-1.5	-1.8	-1.65
1144	DTP	43998	318	1.4	1.6	1.5	0	-0.8	-0.4
1145	DTP	400770	274	1.1	2	1.55	0.9	1.8	1.35
1146	DTP	636718	264	-2.5	-2.2	-2.35	0.7	-0.9	-0.1
1147	DTP	661221	275	-0.8	-0.9	-0.85	-1.3	-1.7	-1.5
1148	DTP	7578	343	-2.4	-2.8	-2.6	1	0.6	0.8
1149	DTP	13176	318	1.2	1.4	1.3	0.9	-0.8	0.05
1150	DTP	25435	310.29	-2.6	-3.6	-3.1	-0.9	-0.6	-0.75
1151	DTP	30260	349.42	-0.7	-0.8	-0.75	-0.2	-0.3	-0.25
1152	DTP	35545	301	-0.3	0.1	-0.1	-0.4	-0.4	-0.4
1153	DTP	38090	333	0.1	0.5	0.3	-0.8	-0.5	-0.65
1154	DTP	44584	334	0.6	-1	-0.2	-0.3	-0.2	-0.25
1155	DTP	44750	312	1.4	1.8	1.6	0.8	0.7	0.75
1156	DTP	50648	308	1.4	1.7	1.55	-2	-1.8	-1.9
1157	DTP	60183	310	1	1.1	1.05	0.7	0.5	0.6
1158	DTP	65689	327	0.5	1	0.75	0	-1.1	-0.55
1159	DTP	73254	347	-0.6	0.2	-0.2	-0.4	-0.4	-0.4
1160	DTP	86467	328	-0.7	-1.4	-1.05	-1.5	-0.6	-1.05
1161	DTP	92892	337	0.6	1.1	0.85	1.5	0.7	1.1
1162	DTP	99657	325	0.5	0.7	0.6	0.5	-0.6	-0.05
1163	DTP	636734	279	0.7	0.6	0.65	0.3	0.5	0.4
1164	DTP	680516	290	-0.6	-1.2	-0.9	-0.2	-0.9	-0.55
1165	DTP	45527	304.37	1	2	1.5	1	0.7	0.85
1166	DTP	50651	336.78	0.6	2.6	1.6	-0.9	-0.6	-0.75
1167	DTP	60423	321	1.5	0.9	1.2	1.3	1.5	1.4
1168	DTP	66695	340	0.5	1.8	1.15	0.3	-0.5	-0.1
1169	DTP	76988	302.24	1.5	1.2	1.35	-0.3	1.1	0.4
1170	DTP	87010	302	0.9	-0.6	0.15	0.3	-0.4	-0.05
1171	DTP	93033	305	-0.1	1.1	0.5	0.2	0.7	0.45
1172	DTP	99660	339.47	0.9	0	0.45	0.9	1.3	1.1
1173	DTP	30622	333	0.4	0.1	0.25	1.3	0	0.65
1174	DTP	3064	328	0.6	0.6	0.6	1.1	0.1	0.6
1175	DTP	45545	308	0.7	1.4	1.05	0.1	0.9	0.5
1176	DTP	50690	307.35	1.8	1.5	1.65	-0.3	0.1	-0.1
1177	DTP	60659	312.37	2.3	2.5	2.4	1.3	1.4	1.35
1178	DTP	68116	315	2.1	1.9	2	0.9	0.1	0.5
1179	DTP	79486	340	-0.5	-0.5	-0.5	0.1	0	0.05
1180	DTP	87084	331	0.1	-1.1	-0.5	-0.5	-1.3	-0.9
1181	DTP	95204	306	0.2	0.5	0.35	1	0.9	0.95
1182	DTP	637359	258	0.6	0.6	0.6	1	0.5	0.75
1183	DTP	689002	287	0.3	0.2	0.25	2.1	0.4	1.25
1184	DTP	19123	305	0	-1	-0.5	1.1	1	1.05
1185	DTP	46213	312	1.1	1.2	1.15	0.2	0.6	0.4
1186	DTP	51683	315.8	1.1	1.4	1.25	0.9	1.3	1.1
1187	DTP	61642	344	4.9	5	4.95	-0.3	0.1	-0.1
1188	DTP	69359	302	1.8	1.7	1.75	0.3	0.2	0.25
1189	DTP	79559	308	1.1	1.1	1.1	-1.7	-0.7	-1.2
1190	DTP	87136	312	0.6	-0.2	0.2	-0.3	-0.2	-0.25
1191	DTP	95916	343	-0.7	1.2	0.25	0.2	0.5	0.35
1192	DTP	16722	302	1.4	1.7	1.55	0.5	1	0.75
1193	DTP	11307	314	-0.6	0.1	-0.25	1.8	1.4	1.6
1194	DTP	25673	347	0.9	-0.2	0.35	1.8	1.6	1.7
1195	DTP	46492	313	-0.5	-0.1	-0.3	-1	-1.2	-1.1
1196	DTP	53874	327	2.3	3	2.65	0.9	0.9	0.9
1197	DTP	62375	310	-0.2	0.5	0.15	1	1.6	1.3
1198	DTP	70413	327.38	2	2.4	2.2	0.4	0.9	0.65
1199	DTP	81493	303	1.5	0.8	1.15	0.8	0.7	0.75
1200	DTP	87838	346.43	-0.3	-1.2	-0.75	0.8	-0.4	0.2
1201	DTP	96541	310	1.3	1.6	1.45	2.2	3.1	2.65
1202	DTP	26112	306	-0.4	-0.6	-0.5	-1.4	-1.9	-1.65
1203	DTP	22070	306	1.3	1.4	1.35	1.4	0.7	1.05
1204	DTP	33575	345.44	-0.6	-0.9	-0.75	0.8	1	0.9
1205	DTP	48388	330	1.4	2	1.7	1.1	1.3	1.2
1206	DTP	55152	346	2	1.8	1.9	0.9	1.2	1.05
1207	DTP	63543	326	1.3	2	1.65	1.9	1.5	1.7
1208	DTP	71097	310	-0.7	-0.6	-0.65	-0.9	-0.7	-0.8
1209	DTP	81750	329.31	1.9	0.7	1.3	-0.4	0.3	-0.05
1210	DTP	90749	303.38	0.7	0	0.35	-0.5	-1.4	-0.95
1211	DTP	96996	339	-1.2	-0.8	-1	0.1	-0.6	-0.25
1212	DTP	34865	322	1.7	1.9	1.8	1.2	1.6	1.4
1213	DTP	70895	316	0.9	1.9	1.4	1.6	1.4	1.5
1214	DTP	80313	325	0.9	1.1	1	1.1	2.2	1.65
1215	DTP	48443	332	0.4	1	0.7	0.6	0.7	0.65
1216	DTP	56410	348	0.5	0.2	0.35	0.5	1.7	1.1
1217	DTP	64672	344	2.1	1.3	1.7	2.1	1.4	1.75
1218	DTP	71866	305	0.9	1.4	1.15	1.6	1.5	1.55
1219	DTP	82560	309	1.5	0.2	0.85	0.2	-0.7	-0.25
1220	DTP	91378	342	1.1	0	0.55	0.2	-0.3	-0.05
1221	DTP	98363	342	0.4	1.4	0.9	0.7	0.4	0.55
1222	DTP	47680	301	0.9	0.5	0.7	-0.6	0	-0.3
1223	DTP	83961	303	1.9	1.3	1.6	0.9	-0.3	0.3
1224	DTP	81856	327	0	0.3	0.15	0.3	0.8	0.55
1225	DTP	48617	312	-0.3	0.7	0.2	0.7	0.5	0.6
1226	DTP	60013	307	0.3	0.3	0.3	0.3	0.8	0.55
1227	DTP	64859	328	0.7	0.6	0.65	0.7	0.8	0.75
1228	DTP	71881	314	-0.2	-0.6	-0.4	0.2	0.1	0.15
1229	DTP	83497	326	0.1	-1.8	-0.85	-0.3	-1	-0.65
1230	DTP	91382	340	-0.6	-1.1	-0.85	-0.2	-1.3	-0.75
1231	DTP	99634	322	-0.7	-0.1	-0.4	-1.1	-0.3	-0.7
1232	DTP	76015	344	0.2	0	0.1	0.7	-0.7	0
1233	DTP	524385	268	0.3	-0.4	-0.05	0.5	0.5	0.5
1234	DTP	94600	348	0.8	0.5	0.65	-1.8	-1.7	-1.75
1235	DTP	99663	319	0.5	0.4	0.45	1.3	-0.4	0.45
1236	DTP	111194	347	0.5	0.6	0.55	-0.8	0.3	-0.25
1237	DTP	123389	325	-1.3	-1.3	-1.3	0.2	0	0.1
1238	DTP	143974	336	-1.2	-0.1	-0.65	0.2	0.8	0.5
1239	DTP	151252	301	-0.2	-1.3	-0.75	0.3	0.5	0.4
1240	DTP	164435	338	-1.1	-1.6	-1.35	0	1.5	0.75
1241	DTP	186200	340	-0.7	-0.9	-0.8	1.8	1.8	1.8
1242	DTP	205832	350	-0.3	-0.5	-0.4	0.8	1	0.9
1243	DTP	216607	320	-1	-0.5	-0.75	0.8	1.1	0.95
1244	DTP	244387	328	-0.9	-0.7	-0.8	0.9	1.5	1.2
1245	DTP	101789	311	0.3	0.5	0.4	0.2	0.8	0.5
1246	DTP	112203	311	1.7	1.6	1.65	0.6	0.4	0.5
1247	DTP	126226	302	1.6	1	1.3	0.6	-0.1	0.25
1248	DTP	146071	320	0.6	0.6	0.6	0.5	1	0.75
1249	DTP	153391	328.38	0.4	0	0.2	-0.5	0.6	0.05
1250	DTP	164459	305	0.1	-1	-0.45	0.7	0.4	0.55
1251	DTP	190501	326	-1.2	-0.6	-0.9	1.4	1.6	1.5
1252	DTP	205842	319	1.5	1.6	1.55	1.6	1.6	1.6
1253	DTP	216621	350	0	0.2	0.1	0.3	0.9	0.6
1254	DTP	246999	331	0.3	0.6	0.45	1.3	-0.4	0.45
1255	DTP	105348	330	0.6	1.4	1	1.2	0.9	1.05
1256	DTP	114449	338	1.8	1.5	1.65	0.7	0.8	0.75
1257	DTP	129536	310	1.2	1.4	1.3	0.2	0.6	0.4
1258	DTP	146554	350	1.1	1.3	1.2	1	0.6	0.8
1259	DTP	154585	335	1.4	0.7	1.05	0.3	0.7	0.5
1260	DTP	165704	336	0.6	-0.4	0.1	0.7	1.4	1.05
1261	DTP	191441	347	0.2	1.2	0.7	1	1.2	1.1
1262	DTP	205912	325	1.7	2	1.85	0.6	1.4	1
1263	DTP	216623	301	1.2	1.3	1.25	0.9	0.9	0.9
1264	DTP	270063	308	1.1	1.4	1.25	-0.5	-0.5	-0.5
1265	DTP	105781	304	0	1.3	0.65	-0.3	0	-0.15
1266	DTP	114997	326	1.5	2	1.75	-0.8	0.6	-0.1
1267	DTP	133075	343.36	1.9	1.9	1.9	0.5	0.1	0.3
1268	DTP	146769	334	0.5	0.4	0.45	0.7	0.8	0.75
1269	DTP	156563	350.33	1.6	0.8	1.2	0.8	1.1	0.95
1270	DTP	169409	339	0.4	-0.5	-0.05	0.7	1.8	1.25
1271	DTP	194308	306	0.6	2	1.3	1	1.2	1.1
1272	DTP	209901	331	0.7	1	0.85	-0.1	-0.6	-0.35
1273	DTP	217913	307	0.4	1.5	0.95	-0.9	0.5	-0.2
1274	DTP	270916	337	0.3	0.5	0.4	0.7	-0.5	0.1
1275	DTP	105798	328	0.6	1.8	1.2	-0.2	0.3	0.05
1276	DTP	116397	329	1.8	2.2	2	0.1	1	0.55
1277	DTP	135184	308	1.5	2.4	1.95	0.5	1.2	0.85
1278	DTP	146770	304	1.9	1.8	1.85	1.3	0.4	0.85
1279	DTP	157725	329.74	2	1.4	1.7	-0.3	0.5	0.1
1280	DTP	176736	335	-1.2	-2	-1.6	0.5	0.1	0.3
1281	DTP	201659	323	0.5	1.1	0.8	-0.2	-1.9	-1.05
1282	DTP	211340	303	0.9	1.4	1.15	0.1	0.5	0.3
1283	DTP	228137	334	0.8	1.8	1.3	-1.3	-0.2	-0.75
1284	DTP	281307	331	1.1	1.3	1.2	-1.7	-0.7	-1.2
1285	DTP	106464	332	0.4	1.3	0.85	0.5	-0.3	0.1
1286	DTP	120290	332	1.7	1.7	1.7	0.1	0.2	0.15
1287	DTP	135381	304	1.4	2.2	1.8	0.8	0.2	0.5
1288	DTP	147358	301	0.7	0.6	0.65	0.4	1.3	0.85
1289	DTP	158959	316	0	0.1	0.05	0.5	1.5	1
1290	DTP	177407	333.09	-0.4	0	-0.2	-3.5	-3.4	-3.45
1291	DTP	201989	343	1.2	1.1	1.15	0.7	-0.7	0
1292	DTP	211787	326	1.7	1.2	1.45	-0.9	-0.6	-0.75
1293	DTP	228150	303	1.2	1	1.1	-0.5	-0.7	-0.6
1294	DTP	281383	319	0.6	1.3	0.95	-0.5	0.1	-0.2
1295	DTP	110332	303	0.8	1.1	0.95	0.6	1	0.8
1296	DTP	120622	316	1.1	1.2	1.15	1.1	2.1	1.6
1297	DTP	137112	347	1	0.7	0.85	0.7	1.5	1.1
1298	DTP	149054	307	1.4	1.5	1.45	1.4	1.1	1.25
1299	DTP	159092	332.8	0.3	0.2	0.25	0.5	1.1	0.8
1300	DTP	186067	339.44	0	-0.1	-0.05	2.1	1.5	1.8
1301	DTP	202705	305	0.6	1.8	1.2	-1.4	-0.7	-1.05
1302	DTP	215684	318	1.1	0.8	0.95	-1.1	-0.3	-0.7
1303	DTP	241619	305	1.5	0.9	1.2	-1.2	1.2	0
1304	DTP	281623	340	0.8	0.9	0.85	-0.7	-1.2	-0.95
1305	DTP	110562	302	-0.1	0.2	0.05	1.6	0.3	0.95
1306	DTP	121908	306	0.6	0.8	0.7	2.3	-0.1	1.1
1307	DTP	142277	320	0.4	0.4	0.4	-0.7	-0.2	-0.45
1308	DTP	150432	318	0.2	-0.5	-0.15	-0.1	0.6	0.25
1309	DTP	159398	347	-0.6	-0.2	-0.4	0	-0.1	-0.05
1310	DTP	186194	324	-0.7	-1.1	-0.9	0.2	-0.3	-0.05
1311	DTP	205827	301	0.8	0.7	0.75	0.5	0.5	0.5
1312	DTP	215689	345	0.8	0.4	0.6	-1.4	-0.4	-0.9
1313	DTP	241624	332	0	1.3	0.65	-0.6	2.4	0.9
1314	DTP	281624	310	0.2	0.2	0.2	-0.3	-0.3	-0.3
1315	DTP	282137	314	-0.6	0.3	-0.15	0.5	0.9	0.7
1316	DTP	300540	331	-0.2	-0.3	-0.25	1.1	1.7	1.4
1317	DTP	319449	341	-1	-0.5	-0.75	1.2	1.7	1.45
1318	DTP	328010	336	-0.6	-0.7	-0.65	1.4	0.6	1
1319	DTP	333544	336	-1.9	-1.6	-1.75	-0.5	-1.4	-0.95
1320	DTP	345850	332	-1.2	-2.6	-1.9	-0.8	-0.4	-0.6
1321	DTP	372146	305	-1.4	-1.3	-1.35	2.1	0.5	1.3
1322	DTP	326375	338	-1.4	-0.5	-0.95	0.4	1.5	0.95
1323	DTP	135168	313	-0.6	-0.7	-0.65	3.3	3.8	3.55
1324	DTP	112125	312	-0.4	-0.7	-0.55	-0.8	-0.6	-0.7
1325	DTP	283849	328	-0.7	1.1	0.2	1.8	0	0.9
1326	DTP	303294	347	0	0.4	0.2	-0.9	1.7	0.4
1327	DTP	321517	313	-0.3	0.5	0.1	1.4	0.7	1.05
1328	DTP	328111	325	0.5	1.2	0.85	-0.5	-0.3	-0.4
1329	DTP	335504	337	-0.7	-0.6	-0.65	0.5	0.4	0.45
1330	DTP	346578	339	-0.8	-2.8	-1.8	-1.8	-1.4	-1.6
1331	DTP	372275	322	-1.2	0.2	-0.5	0.9	1.1	1
1332	DTP	339316	303	-1.3	-1.2	-1.25	-0.7	-1.7	-1.2
1333	DTP	142446	350	-0.4	0.2	-0.1	0.3	0.2	0.25
1334	DTP	126347	328	-0.3	0.1	-0.1	0.1	0	0.05
1335	DTP	288387	348
1336	DTP	303612	322	-2.8	-2.2	-2.5	0	-0.3	-0.15
1337	DTP	324623	327	-0.1	0.7	0.3	1.6	0.9	1.25
1338	DTP	329052	322	0.8	0	0.4	0.5	1.1	0.8
1339	DTP	337726	304	-0.3	-0.1	-0.2	0	0.5	0.25
1340	DTP	349156	325	3.9	1.3	2.6	-1	-0.4	-0.7
1341	DTP	372499	308	-1.4	-0.3	-0.85	0.1	1	0.55
1342	DTP	339594	339	1.1	1.4	1.25	-0.1	-0.2	-0.15
1343	DTP	150114	303	0.9	0.7	0.8	1.1	0.3	0.7
1344	DTP	149050	341	-0.4	0.4	0	0.3	-0.6	-0.15
1345	DTP	293360	343	-1.2	-1.2	-1.2	0.1	0.1	0.1
1346	DTP	305780	341	-2.1	-1.8	-1.95	-0.3	2.6	1.15
1347	DTP	326182	309.32	1	0	0.5	1.6	0.3	0.95
1348	DTP	329249	348.76	-0.8	-1.6	-1.2	0.7	-0.1	0.3
1349	DTP	339589	322	-1.4	-1.5	-1.45	1.6	0.8	1.2
1350	DTP	352890	302.72	0.9	-0.9	0	-0.1	0.4	0.15
1351	DTP	372767	345	-1.4	0.2	-0.6	1.9	1.7	1.8
1352	DTP	252359	342.83	-0.1	-0.1	-0.1	0.8	1.7	1.25
1353	DTP	197008	336	0.6	1	0.8	1.2	1.2	1.2
1354	DTP	187675	323.14	-0.4	-0.2	-0.3	0.5	0.2	0.35
1355	DTP	294750	310	-0.3	0.4	0.05	0.9	2	1.45
1356	DTP	308848	311	0.1	1.4	0.75	1	0.9	0.95
1357	DTP	326184	316	-1	-0.4	-0.7	0.7	0.4	0.55
1358	DTP	329255	329	-0.7	-1	-0.85	-1	-1	-1
1359	DTP	339630	339	-1.1	-0.8	-0.95	0	0.3	0.15
1360	DTP	362639	344.24	-0.3	-1.2	-0.75	-0.6	0.4	-0.1
1361	DTP	375981	337.33	-0.7	0.1	-0.3	1.9	1.8	1.85
1362	DTP	105827	325.34	1.3	0.9	1.1	4.9	5	4.95
1363	DTP	245091	324	0.5	1	0.75	0.8	1.3	1.05
1364	DTP	222362	319	-0.1	0.1	0	0.91	0.89	0.9
1365	DTP	294756	333	-0.5	-0.2	-0.35	0.9	1.8	1.35
1366	DTP	308849	309	-0.5	-0.4	-0.45	-0.1	0.3	0.1
1367	DTP	326385	334	-0.6	-0.3	-0.45	0.1	0.2	0.15
1368	DTP	330770	311	1.4	1.7	1.55	3.8	4.2	4
1369	DTP	341956	307.3	-1.8	-1.2	-1.5	-0.3	0.6	0.15
1370	DTP	366289	303	0	-1.8	-0.9	-0.9	-0.2	-0.55
1371	DTP	375982	344	-0.7	0.3	-0.2	1.7	1.1	1.4
1372	DTP	211356	346	-0.3	0.9	0.3	2.1	1.4	1.75
1373	DTP	278323	326	0.7	1.1	0.9	1	0.9	0.95
1374	DTP	321502	346	0.8	0.5	0.65	1.1	1.1	1.1
1375	DTP	295300	330	-0.8	0.1	-0.35	0.9	0.9	0.9
1376	DTP	319012	321	0.3	0.5	0.4	1.6	0.4	1
1377	DTP	326422	306	-0.3	0.4	0.05	1.5	1.4	1.45
1378	DTP	331968	301	0.2	0.5	0.35	1.3	2.3	1.8
1379	DTP	343549	301	-1.1	-0.7	-0.9	2.6	1.1	1.85
1380	DTP	366801	333	-0.5	-1.3	-0.9	0.7	0.7	0.7
1381	DTP	145992	301	-0.5	0.4	-0.05	1.6	2.1	1.85
1382	DTP	369986	329	0.1	0.2	0.15	0.9	1	0.95
1383	DTP	300289	339.35	0.5	0.9	0.7	0.4	0.8	0.6
1384	DTP	329250	349	0.3	0.4	0.35	0	-0.4	-0.2
1385	DTP	299119	312	-1	-0.1	-0.55	1.2	1.2	1.2
1386	DTP	319424	309	-1.3	-0.4	-0.85	1.1	-0.2	0.45
1387	DTP	326757	318.33	-0.2	-0.3	-0.25	1.2	1.3	1.25
1388	DTP	332670	310.35	-1.5	-1.5	-1.5	0.6	0	0.3
1389	DTP	343550	309	-1.3	-1.4	-1.35	-0.2	2	0.9
1390	DTP	371765	318	-1.6	-1.5	-1.55	1.8	0.9	1.35
1391	DTP	201868	318	-0.4	-0.2	-0.3	1.1	0.5	0.8
1392	DTP	372287	339	-1.1	-0.2	-0.65	1.3	0.4	0.85
1393	DTP	111118	331	1.3	0.8	1.05	-1.1	-1.3	-1.2
1394	DTP	338578	318	-0.5	-0.5	-0.5	-0.5	-1.3	-0.9
1395	DTP	378717	333	7.6	3.1	5.35	-0.4	-0.5	-0.45
1396	DTP	630602	347	1.8	4.1	2.95	0.1	-0.4	-0.15
1397	DTP	660151	304	-0.2	-0.2	-0.2	-0.9	-0.8	-0.85
1398	DTP	12666	364	-0.5	-0.3	-0.4	-0.4	-0.8	-0.6
1399	DTP	24113	369	-2	-1.5	-1.75	-0.8	0	-0.4
1400	DTP	46385	390.42	-0.5	0.2	-0.15	-2.7	-0.9	-1.8
1401	DTP	70799	377	0	1	0.5	-1.2	-1.4	-1.3
1402	DTP	84126	385	0.5	0.9	0.7	-1.4	-1.3	-1.35
1403	DTP	91397	397	1.8	0.3	1.05	-0.9	-0.1	-0.5
1404	DTP	116709	353	-0.3	-0.6	-0.45	-0.9	-1.9	-1.4
1405	DTP	379538	304	2.9	2	2.45	-0.3	0.5	0.1
1406	DTP	631160	317	0.9	0	0.45	-0.4	-0.4	-0.4
1407	DTP	3323	375	0.5	0.6	0.55	0.3	0.1	0.2
1408	DTP	13316	352.86	0.8	1.6	1.2	-1.7	-0.5	-1.1
1409	DTP	29200	357	-0.3	-0.4	-0.35	-2	-0.1	-1.05
1410	DTP	49852	384	-0.2	0.2	0	-1.7	-1.1	-1.4
1411	DTP	73053	381	1.1	1.1	1.1	-0.1	-0.2	-0.15
1412	DTP	89602	377	0.3	0.2	0.25	-1.5	-1.6	-1.55
1413	DTP	97920	392.5	1.8	0.8	1.3	-1.6	-1.9	-1.75
1414	DTP	117028	398	0.7	0.1	0.4	1.7	-2	-0.15
1415	DTP	379697	343	1.6	2	1.8	-0.3	0.5	0.1
1416	DTP	632536	323.48	2	0.1	1.05	1.7	2	1.85
1417	DTP	5157	395.41	0.6	0.3	0.45	0.9	0.9	0.9
1418	DTP	14974	396	0.7	0.8	0.75	-0.4	-0.2	-0.3
1419	DTP	31748	358	0.5	0.3	0.4	0.1	-0.7	-0.3
1420	DTP	50650	363	-0.1	0.1	0	-1.9	-1.2	-1.55
1421	DTP	76350	398	0.1	0.4	0.25	-0.5	-0.2	-0.35
1422	DTP	91340	381	1.1	1	1.05	-1.1	-0.2	-0.65
1423	DTP	99925	383	1.3	0.5	0.9	0.5	0.1	0.3
1424	DTP	117268	378.84	0.2	0.4	0.3	1.6	0.5	1.05
1425	DTP	401077	334.33	1.2	1.2	1.2	-0.3	0.7	0.2
1426	DTP	634396	347	2.5	1.5	2	0.9	1.3	1.1
1427	DTP	5836	362	1.2	0.9	1.05	1.2	1.6	1.4
1428	DTP	16437	368	1.2	0.9	1.05	1.1	1.1	1.1
1429	DTP	34871	364	0	0.7	0.35	0.4	-0.2	0.1
1430	DTP	50654	382.42	-0.8	-1.1	-0.95	-0.3	-0.3	-0.3
1431	DTP	78846	359	-0.3	0.3	0	-0.5	-0.2	-0.35
1432	DTP	91355	361	0.7	0.8	0.75	-0.1	0.1	0
1433	DTP	100708	385	1.5	0.7	1.1	1.7	0.9	1.3
1434	DTP	117987	360	0	0.4	0.2	-0.3	1.2	0.45
1435	DTP	403447	304	1.4	2	1.7	-0.7	-0.3	-0.5
1436	DTP	637153	327
1437	DTP	7419	393	1	1	1	-0.3	-0.1	-0.2
1438	DTP	16736	362.34	0.7	0.2	0.45	0.5	0.9	0.7
1439	DTP	36317	384	0.4	0.5	0.45	0.8	-0.5	0.15
1440	DTP	50688	358	1.4	0.9	1.15	-6.3	-6.5	-6.4
1441	DTP	80137	386.49	0.1	0.2	0.15	-0.3	0.2	-0.05
1442	DTP	91356	361	0.4	0.5	0.45	-0.2	0.2	0
1443	DTP	103331	399	0.8	0.5	0.65	0.9	0.2	0.55
1444	DTP	118818	369	0.3	0.3	0.3	0.3	0.6	0.45
1445	DTP	622608	322.24	2.2	1.3	1.75	-1.4	-0.9	-1.15
1446	DTP	637317	344	1.1	1.8	1.45	0.6	0.6	0.6
1447	DTP	9032	364	2	0.4	1.2	1	1	1
1448	DTP	17355	357	0.3	0.4	0.35	0.1	0.5	0.3
1449	DTP	36818	374.48	0.4	0.5	0.45	0.7	-0.2	0.25
1450	DTP	57624	384	0.1	-0.6	-0.25	-0.7	-0.7	-0.7
1451	DTP	81463	400	-0.2	0.1	-0.05	-0.5	0	-0.25
1452	DTP	91357	361	0.3	0.5	0.4	-0.7	-0.1	-0.4
1453	DTP	107679	380	0.9	0.7	0.8	0.5	-0.4	0.05
1454	DTP	120289	390.43	0.8	1.1	0.95	0.3	1.6	0.95
1455	DTP	623109	307	0.7	0.9	0.8	-0.5	0.7	0.1
1456	DTP	637325	310	2.5	2.1	2.3	0.3	0.6	0.45
1457	DTP	11668	385.25	0.6	1.2	0.9	0.7	0.8	0.75
1458	DTP	19061	385.25	0.5	0.8	0.65	0.3	0.9	0.6
1459	DTP	37627	392.41	0.1	0.4	0.25	0.1	-0.3	-0.1
1460	DTP	63680	376	-0.3	-0.9	-0.6	-1.5	-1.5	-1.5
1461	DTP	81915	378	0	0	0	0	0	0
1462	DTP	91368	377	0	0.2	0.1	-0.4	-0.4	-0.4
1463	DTP	111210	397	0.5	1	0.75	0.4	1	0.7
1464	DTP	124818	354	0.8	1.9	1.35	-0.1	0.6	0.25
1465	DTP	623638	350	0.4	1.4	0.9	-0.7	0	-0.35
1466	DTP	651084	347	0	0.4	0.2	-0.1	-0.6	-0.35
1467	DTP	11881	390	2.3	2.8	2.55	-0.3	-0.3	-0.3
1468	DTP	20192	386	0	-0.2	-0.1	-0.1	0.3	0.1
1469	DTP	46075	370	-0.3	0.3	0	0.1	-0.6	-0.25
1470	DTP	65537	356	-2.5	-3.3	-2.9	-1.5	-2.1	-1.8
1471	DTP	84100	392.46	-0.2	0	-0.1	0.2	-0.3	-0.05
1472	DTP	91396	397	-0.2	0	-0.1	0	-0.4	-0.2
1473	DTP	114414	357	0.5	0.7	0.6	1.6	-0.3	0.65
1474	DTP	126837	391	-0.1	-0.1	-0.1	0.5	1.2	0.85
1475	DTP	131467	386	-0.8	0.1	-0.35	0.7	0.3	0.5
1476	DTP	159566	351	0.7	1.8	1.25	1.1	1.6	1.35
1477	DTP	204665	376	-0.2	0.4	0.1	1.6	1.2	1.4
1478	DTP	271923	359.44	-0.1	-0.9	-0.5	1.6	1.3	1.45
1479	DTP	298892	373	-1.5	-1.2	-1.35	0	-0.3	-0.15
1480	DTP	329065	369	-1.1	-1.3	-1.2	-0.2	-0.9	-0.55
1481	DTP	637578	325	0.1	-0.1	0	-0.2	-0.5	-0.35
1482	DTP	177862	351	-0.5	0.8	0.15	-0.6	-0.1	-0.35
1483	DTP	60785	364	0	1.3	0.65	0.9	0.3	0.6
1484	DTP	216633	391	0.2	1.2	0.7	0.8	-0.6	0.1
1485	DTP	131616	354	-0.4	-0.1	-0.25	1.8	1.8	1.8
1486	DTP	163639	399	0.7	0.6	0.65	1	0.4	0.7
1487	DTP	214009	362	-0.5	0.5	0	1.3	1.3	1.3
1488	DTP	275266	374	0.9	0.4	0.65	1.7	1.8	1.75
1489	DTP	309401	377	-1.7	-1.6	-1.65	-0.4	-1.5	-0.95
1490	DTP	338519	355	1.9	1.8	1.85	0.6	-0.7	-0.05
1491	DTP	13487	379	-6.7	-6.6	-6.65	-1.4	-1.2	-1.3
1492	DTP	275428	361.83	1.3	1.3	1.3	1	1	1
1493	DTP	99867	363	1.2	1.5	1.35	1.4	1.2	1.3
1494	DTP	319709	352	0.9	0.4	0.65	0.9	0.6	0.75
1495	DTP	134137	371	0	0.2	0.1	1.9	1.4	1.65
1496	DTP	163823	356	0.2	0.8	0.5	0.8	0.6	0.7
1497	DTP	215721	386	0.1	-0.4	-0.15	1.6	1.2	1.4
1498	DTP	275971	365	0.5	0.2	0.35	0.7	0.4	0.55
1499	DTP	310354	372	1.7	1	1.35	1.5	2.1	1.8
1500	DTP	339161	395	0.6	-1.3	-0.35	0.6	0.6	0.6
1501	DTP	45572	386	0.1	0.5	0.3	0.2	1.7	0.95
1502	DTP	280594	400.29	0.9	1.4	1.15	0.2	0.3	0.25
1503	DTP	125095	375	1.1	1.1	1.1	1.1	0.8	0.95
1504	DTP	622691	317	1.3	0.2	0.75	-1.4	-1.4	-1.4
1505	DTP	139168	390	-0.3	0.2	-0.05	0.8	0	0.4
1506	DTP	164991	367	0.5	0.7	0.6	1.7	1.7	1.7
1507	DTP	216606	354	0.9	1.2	1.05	0.4	-0.1	0.15
1508	DTP	289359	352	0.1	0.8	0.45	-0.3	1.7	0.7
1509	DTP	317605	368	-2.1	-2.1	-2.1	1.3	2.5	1.9
1510	DTP	347463	357	-0.9	-1.1	-1	1.3	1.2	1.25
1511	DTP	56287	365	0.1	1.3	0.7	0.5	1.5	1
1512	DTP	321491	383	1.1	0.8	0.95	1.5	1.2	1.35
1513	DTP	338042	392.46	1.5	1.5	1.5	1.7	1.6	1.65
1514	DTP	680495	312	2.1	1.7	1.9	0.9	0.1	0.5
1515	DTP	151721	354	-0.7	-0.3	-0.5	1.4	1.2	1.3
1516	DTP	166637	384	0.1	0.4	0.25	1.6	1.9	1.75
1517	DTP	217697	359	0.5	0.8	0.65	1.8	1.8	1.8
1518	DTP	292140	373	1.7	0.8	1.25	1.8	1.7	1.75
1519	DTP	319435	367	0.8	0.2	0.5	2	1.2	1.6
1520	DTP	350187	388	-1.2	-1.1	-1.15	1.3	0.4	0.85
1521	DTP	88600	377	0.1	0.8	0.45	0.3	1.2	0.75
1522	DTP	345845	364.45	1.7	1.4	1.55	2	1.5	1.75
1523	DTP	37219	358	1.6	1.6	1.6	1.4	1.3	1.35
1524	DTP	4292	380.44	1	0.9	0.95	-0.1	0.8	0.35
1525	DTP	151888	375	0.2	-0.3	-0.05	1.2	1.6	1.4
1526	DTP	191454	363	0.1	0.3	0.2	0.6	0.1	0.35
1527	DTP	250429	364	0.4	0.7	0.55	1.9	0.6	1.25
1528	DTP	292923	370	0.7	0.2	0.45	0.5	-0.4	0.05
1529	DTP	319994	362	1.7	0.4	1.05	1.1	0.8	0.95
1530	DTP	350625	386.5	-1.1	-0.9	-1	1.3	0.9	1.1
1531	DTP	106231	360	0.2	1.1	0.65	0.2	1.4	0.8
1532	DTP	407628	302	1.2	1.5	1.35	1.9	1.6	1.75
1533	DTP	88916	369.56	0	-0.3	-0.15	-0.1	-0.1	-0.1
1534	DTP	62685	353	1.7	0.9	1.3	0.9	0.7	0.8
1535	DTP	154389	396
1536	DTP	201863	370.28	0	-0.4	-0.2	0.3	0.2	0.25
1537	DTP	263220	387.86	0	0.3	0.15	1.6	1.7	1.65
1538	DTP	293962	366	0.2	0.1	0.15	0.3	0.1	0.2
1539	DTP	320218	388	0.6	0.4	0.5	-0.5	-0.8	-0.65
1540	DTP	354261	355	-1	-1.8	-1.4	1.5	0.8	1.15
1541	DTP	102314	358	-0.1	0.4	0.15	1.3	1	1.15
1542	DTP	32984	369	1	1.2	1.1	1.6	1.4	1.5
1543	DTP	110300	358	0.9	0.1	0.5	1.9	0.9	1.4
1544	DTP	163443	394.47	0.3	-0.1	0.1	1.6	2	1.8
1545	DTP	156565	359.38
1546	DTP	204262	396	-0.9	-0.8	-0.85	0.3	0.5	0.4
1547	DTP	270071	391	-0.4	-0.8	-0.6	1.6	1.5	1.55
1548	DTP	295486	359	0.3	0.2	0.25	1.1	1.8	1.45
1549	DTP	325014	383	2	1.6	1.8	-1.3	-1.6	-1.45
1550	DTP	359472	361.4	0.5	1.3	0.9	0.3	0.4	0.35
1551	DTP	116702	362	0.1	0.6	0.35	0.7	1.4	1.05
1552	DTP	54709	369.55	0.3	0	0.15	2.1	1.7	1.9
1553	DTP	142335	399	0.1	0	0.05	1.1	1.1	1.1
1554	DTP	327702	353.44	-1.5	-1.6	-1.55	0.8	0	0.4
1555	DTP	367306	381	1.1	0	0.55	-0.3	-1	-0.65
1556	DTP	622689	353	-1	-1.1	-1.05	0.8	0	0.4
1557	DTP	13294	430	0	-0.4	-0.2	-1.1	-1.1	-1.1
1558	DTP	59620	413	-1.5	-2	-1.75	-1.1	-1.1	-1.1
1559	DTP	107701	416	0.2	-1.7	-0.75	-0.6	-0.7	-0.65
1560	DTP	172255	424	-1.5	-1.3	-1.4	0.5	0.4	0.45
1561	DTP	295358	408	0.7	-0.5	0.1	-1.6	-2.1	-1.85
1562	DTP	335506	417.93	0	-0.1	-0.05	-0.6	1.1	0.25
1563	DTP	36508	471	-1.2	0.4	-0.4	0.1	-0.1	0
1564	DTP	73735	484.51	-0.8	-0.2	-0.5	0.7	1	0.85
1565	DTP	367469	362	-0.1	0	-0.05	-0.3	-0.5	-0.4
1566	DTP	661122	370	-0.3	0.2	-0.05	-0.8	-0.8	-0.8
1567	DTP	13791	447	0.8	0.5	0.65	-0.4	-0.5	-0.45
1568	DTP	70933	415	-0.2	0.1	-0.05	-0.1	-0.4	-0.25
1569	DTP	123418	441	1	0.7	0.85	-0.1	-0.3	-0.2
1570	DTP	201631	436.44	-0.4	-0.4	-0.4	-0.4	-0.8	-0.6
1571	DTP	305798	404.33	0.7	0.3	0.5	-2.4	-2.2	-2.3
1572	DTP	337832	430	-0.3	-0.3	-0.3	0	0.7	0.35
1573	DTP	37553	476.58	-0.5	-0.7	-0.6	0.7	1.5	1.1
1574	DTP	80997	472.63	0.7	0.1	0.4	4.9	5.1	5
1575	DTP	379388	359	0.3	0.6	0.45	-0.3	-0.2	-0.25
1576	DTP	665497	368	0.7	1.6	1.15	0.1	0	0.05
1577	DTP	30625	411	0.1	0.3	0.2	-0.4	-0.5	-0.45
1578	DTP	85433	424	0.2	0.4	0.3	-0.2	-0.5	-0.35
1579	DTP	123527	412	0.8	-0.5	0.15	-0.4	-0.7	-0.55
1580	DTP	204232	406.35	-0.9	-0.7	-0.8	-0.2	-0.3	-0.25
1581	DTP	309874	446.99	-2	-1.8	-1.9	0.3	0.3	0.3
1582	DTP	373600	401	-0.6	-0.2	-0.4	0.5	1.1	0.8
1583	DTP	37641	496.57	1.1	1.5	1.3	3.2	3.5	3.35
1584	DTP	103520	462	0.4	0.1	0.25	0.1	0.4	0.25
1585	DTP	379555	357.81	0	0.4	0.2	-0.8	-0.6	-0.7
1586	DTP	670283	356.46	-1.1	-0.9	-1	-1.3	-1.6	-1.45
1587	DTP	41148	414	0.3	0.4	0.35	-0.4	-0.1	-0.25
1588	DTP	89201	440.41	-0.3	-0.4	-0.35	-0.6	-0.3	-0.45
1589	DTP	127133	434	-0.1	-0.6	-0.35	-0.2	-0.4	-0.3
1590	DTP	215718	401.28	-0.9	-0.9	-0.9	-0.7	-0.8	-0.75
1591	DTP	309892	407.87	-1	-0.5	-0.75	0.9	1.2	1.05
1592	DTP	376254	447	-0.1	-0.3	-0.2	-0.2	0.5	0.15
1593	DTP	41400	493	1.3	0.8	1.05	1	0.2	0.6
1594	DTP	107522	499	0.3	0.3	0.3	0.2	0.2	0.2
1595	DTP	382035	378.43	-1.5	-1	-1.25	-1.9	-1.8	-1.85
1596	DTP	672865	367	-1.1	-0.7	-0.9	-0.2	-0.1	-0.15
1597	DTP	42199	404	0.1	0	0.05	0.4	-0.1	0.15
1598	DTP	89821	407	0.4	0	0.2	-0.1	-0.6	-0.35
1599	DTP	128606	435	0.2	0.1	0.15	-0.3	-0.2	-0.25
1600	DTP	221019	428.44	2.6	1.6	2.1	0.3	0	0.15
1601	DTP	311153	433.55	-0.4	-0.7	-0.55	0.5	0.4	0.45
1602	DTP	379099	402	1.3	1.6	1.45	0.5	0.6	0.55
1603	DTP	55691	493.23	0	0.1	0.05	0.9	1.1	1
1604	DTP	116339	459	1.8	1.6	1.7	-3.4	-3.3	-3.35
1605	DTP	601359	392.25	0.8	1.6	1.2	1.1	0.4	0.75
1606	DTP	1614	446.63	0.1	0	0.05	-0.4	-0.3	-0.35
1607	DTP	53275	434.45	0.3	-0.1	0.1	-0.6	-0.6	-0.6
1608	DTP	105584	422	0.1	0.2	0.15	-0.1	-0.1	-0.1
1609	DTP	136513	410	1.1	1	1.05	0.7	0.4	0.55
1610	DTP	234348	421	-1.2	-1.6	-1.4	-1.2	-0.4	-0.8
1611	DTP	321496	410.99	-1.7	-1.6	-1.65	0.5	0.9	0.7
1612	DTP	8675	492
1613	DTP	64876	495	1.9	0.5	1.2	0.8	0.4	0.6
1614	DTP	146771	476.49	-0.79	-0.72	-0.755	8.8	10.9	9.85
1615	DTP	603071	363.37	0.2	0.3	0.25	-1	-1.1	-1.05
1616	DTP	5856	448.56	0.4	0.8	0.6	-0.2	-0.5	-0.35
1617	DTP	57608	401	-0.4	-0.4	-0.4	-0.2	-0.2	-0.2
1618	DTP	107582	430	-1.2	-1.2	-1.2	0.1	-0.2	-0.05
1619	DTP	156516	425	-0.6	-0.4	-0.5	0.4	-0.2	0.1
1620	DTP	280058	430	-1.9	-1.7	-1.8	-1.6	-0.7	-1.15
1621	DTP	328087	414	-1.1	-0.2	-0.65	0.4	0.7	0.55
1622	DTP	15910	451	0.2	0	0.1	0.4	0.9	0.65
1623	DTP	67436	487	0.5	0.4	0.45	1.6	1	1.3
1624	DTP	166375	464	0.1	0.4	0.25	1.3	0.4	0.85
1625	DTP	607097	357.41	-0.8	-0.7	-0.75	-0.6	-0.6	-0.6
1626	DTP	12865	405	-1.3	-1.2	-1.25	0.3	0	0.15
1627	DTP	58904	431	-0.6	0.1	-0.25	-1.9	-1.6	-1.75
1628	DTP	107677	409	-1.2	-2	-1.6	0	-0.4	-0.2
1629	DTP	164676	404	1.5	0.6	1.05	0	-0.6	-0.3
1630	DTP	290311	421	-2.3	2.7	0.2	-2.2	-0.7	-1.45
1631	DTP	328403	427	2	-0.8	0.6	3.8	4.4	4.1
1632	DTP	19803	464.38	1.5	2.1	1.8	0	0.1	0.05
1633	DTP	70931	451	-3.3	-0.7	-2	-4.5	-4.7	-4.6
1634	DTP	168184	467	-1	-0.7	-0.85	-0.1	0.3	0.1
1635	DTP	196515	476	1.7	-0.5	0.6	0.2	-0.6	-0.2
1636	DTP	335979	452	-0.1	0.1	0	-1.1	-0.6	-0.85
1637	DTP	61610	548.6	3	3	3	1	0.3	0.65
1638	DTP	260594	504.55	1.1	-1.4	-0.15	1.1	1.7	1.4
1639	DTP	268251	575.75	7.9	9.3	8.6	-1.5	-1.5	-1.5
1640	DTP	636717	250	0.1	1.3	0.7	-1	-0.9	-0.95
1641	DTP	645033	372	-0.5	-1.3	-0.9	0.2	0.4	0.3
1642	DTP	203912	410	-2.7	0.3	-1.2	-0.3	-0.3	-0.3
1643	DTP	146557	481	-0.9	1	0.05	-0.3	0.1	-0.1
1644	DTP	5907	463	1.2	0.8	1	-0.9	-1.2	-1.05
1645	DTP	211490	472.49	-0.1	0	-0.05	-1.7	-2	-1.85
1646	DTP	342459	469	0.6	0.5	0.55	-1.3	0.1	-0.6
1647	DTP	80731	507	0.2	1.8	1	-1.7	-1.8	-1.75
1648	DTP	345647	546.53	0.8	-0.5	0.15	-1.5	-1.4	-1.45
1649	DTP	330500	560.69	1	1.1	1.05	-1.2	-0.5	-0.85
1650	DTP	637290	215	-0.6	-0.1	-0.35	-0.3	-0.7	-0.5
1651	DTP	13051	407	0.7	0.4	0.55	0.8	0.5	0.65
1652	DTP	341196	410.47	0	0.6	0.3	-0.3	0.7	0.2
1653	DTP	159242	463	0.7	1.1	0.9	0.2	0.8	0.5
1654	DTP	11667	474.16	0.2	0.5	0.35	-2	-0.4	-1.2
1655	DTP	277184	454
1656	DTP	343256	478
1657	DTP	80735	528	0.4	1	0.7	-1.9	-1	-1.45
1658	DTP	354844	508.52	-0.2	-0.1	-0.15	-0.3	-0.3	-0.3
1659	DTP	7524	674	-1.1	0.3	-0.4	0.7	0.8	0.75
1660	DTP	638080	220	0.3	1.2	0.75	-0.5	-0.3	-0.4
1661	DTP	109128	416	0.6	0.4	0.5	0.4	0.1	0.25
1662	DTP	19970	499	0.5	0.4	0.45	1.6	0.1	0.85
1663	DTP	310325	502	1.6	0.6	1.1	1.3	0.3	0.8
1664	DTP	60339	487	2	0.5	1.25	-1.2	-1.3	-1.25
1665	DTP	281816	472.62	-0.4	-0.7	-0.55	-1.3	-2	-1.65
1666	DTP	371178	500	0.6	1	0.8	0.1	1.7	0.9
1667	DTP	83950	506	0.9	1.1	1	-1.2	-0.4	-0.8
1668	DTP	654260	549.81	1.5	1.9	1.7	4.2	4.5	4.35
1669	DTP	122819	656.66	-0.4	0.1	-0.15	0.2	0.2	0.2
1670	DTP	638134	203	1.2	1.6	1.4	-0.7	-0.1	-0.4
1671	DTP	163910	441.31	1.7	1.1	1.4	0.4	0.6	0.5
1672	DTP	96021	456	1.5	1.4	1.45	0.1	0.4	0.25
1673	DTP	308835	484.59	1	0.1	0.55	0.6	0.1	0.35
1674	DTP	639174	457	0.6	-0.1	0.25	-1.5	-1.8	-1.65
1675	DTP	292253	464	0.2	0.4	0.3	-0.2	0.1	-0.05
1676	DTP	379696	499	1.4	0.8	1.1	-0.1	1.4	0.65
1677	DTP	91529	516	-0.6	1.6	0.5	0.9	0.2	0.55
1678	DTP	679525	533	2.6	1.4	2	0.2	0.3	0.25
1679	DTP	227186	697.14	1.3	0.2	0.75	-0.8	-1.1	-0.95
1680	DTP	643150	222	0.2	1	0.6	-0.6	-0.5	-0.55
1681	DTP	378719	404.25	0.9	0.6	0.75	0.3	0.3	0.3
1682	DTP	3391	554	1.6	1	1.3	0.6	-0.3	0.15
1683	DTP	380802	363	0.7	1	0.85	0.5	0.4	0.45
1684	DTP	317003	456	-2.4	-2.3	-2.35	-1.7	-0.9	-1.3
1685	DTP	31762	529	3.5	3.8	3.65	1	2.8	1.9
1686	DTP	133071	512	-0.9	-0.8	-0.85	-1.2	-1.5	-1.35
1687	DTP	727038	542	0.8	0.6	0.7	0.2	0.2	0.2
1688	DTP	19990	770	-0.4	1.4	0.5	-0.8	-1	-0.9
1689	DTP	645987	242	0.6	1.2	0.9	-0.1	0.4	0.15
1690	DTP	30663	405	1	1	1	-0.1	-0.5	-0.3
1691	DTP	65238	408
1692	DTP	121868	423	-0.2	0.5	0.15	0.5	1.2	0.85
1693	DTP	319990	474.55	-1	-1.4	-1.2	1.2	0.3	0.75
1694	DTP	45383	506.47	1	2.2	1.6	0.9	-1.4	-0.25
1695	DTP	139105	539	-0.7	-0.6	-0.65	-0.1	-0.1	-0.1
1696	DTP	143491	579	-1.3	-2.4	-1.85	-0.8	1	0.1
1697	DTP	605333	223	-0.2	0.2	0	-1	-0.9	-0.95
1698	DTP	5053	335	-0.5	1.3	0.4	-0.8	0.6	-0.1
1699	DTP	222365	435	1	0.5	0.75	-0.4	-0.4	-0.4
1700	DTP	166259	416	0.8	-0.3	0.25	2	0.9	1.45
1701	DTP	143241	411	0.7	1.6	1.15	0.7	1.1	0.9
1702	DTP	322661	475.3	0.4	0.3	0.35	-2.3	-0.1	-1.2
1703	DTP	45384	520.5	0.4	0.4	0.4	-1.5	-1.8	-1.65
1704	DTP	202386	521.49	-0.2	0.1	-0.05	-1.6	-1.2	-1.4
1705	DTP	177365	566.46	-0.5	-0.8	-0.65	-0.3	-1.2	-0.75
1706	DTP	622175	203	-0.2	0.5	0.15	-0.7	-0.9	-0.8
1707	DTP	683648	251	1.1	2.1	1.6	-0.7	-0.3	-0.5
1708	DTP	158413	429.91	0.1	-0.3	-0.1	-0.5	-0.6	-0.55
1709	DTP	168027	424	0.8	-1.8	-0.5	1.1	0.2	0.65
1710	DTP	638432	407	-0.8	-0.8	-0.8	0	0.4	0.2
1711	ChemBridge	3000300	164.21	-0.35	-1.6	-0.975	-1.31	-0.94	-1.125
1712	ChemBridge	4001641	292.19	-0.65	-1.34	-0.995	-1.07	-0.95	-1.01
1713	ChemBridge	3013825	231.05	-0.56	-1.29	-0.925	-1.3	-1.18	-1.24
1714	ChemBridge	4002249	220.1	0.47	-0.8	-0.165	-1.04	-0.92	-0.98
1715	ChemBridge	4002551	209.68	0.1	-1.19	-0.545	-1.16	-0.95	-1.055
1716	ChemBridge	4003073	195.65	-0.37	-1.58	-0.975	-0.92	-0.88	-0.9
1717	ChemBridge	4004080	334.3	0.05	-0.94	-0.445	-0.9	-1.08	-0.99
1718	ChemBridge	4003401	291.61	0.46	-0.74	-0.14	-0.21	-0.5	-0.355
1719	ChemBridge	4013379	233.67	0.68	-1.16	-0.24	-0.63	-0.57	-0.6
1720	ChemBridge	4015039	191.63	0.39	-1	-0.305	0.03	-0.57	-0.27
1721	ChemBridge	3000350	154.24	-0.74	-0.67	-0.705	-1.09	-0.7	-0.895
1722	ChemBridge	4001643	292.19	-0.59	-0.67	-0.63	-1.14	-0.8	-0.97
1723	ChemBridge	3013838	180.21	-0.25	-0.59	-0.42	-1.2	-0.94	-1.07
1724	ChemBridge	4002368	148.21	-0.44	-0.76	-0.6	-1.13	-0.22	-0.675
1725	ChemBridge	4002714	222.72	-0.43	-0.51	-0.47	-0.67	-0.7	-0.685
1726	ChemBridge	4003264	240.76	-0.7	-0.49	-0.595	-0.9	-0.74	-0.82
1727	ChemBridge	4004081	334.3	0.6	-0.9	-0.15	-0.63	-0.78	-0.705
1728	ChemBridge	4003415	287.19	-0.46	-0.1	-0.28	-0.2	-0.47	-0.335
1729	ChemBridge	4013380	233.67	-0.27	-0.48	-0.375	-0.91	-0.16	-0.535
1730	ChemBridge	4015328	176.65	-0.61	-0.89	-0.75	-1.02	-0.2	-0.61
1731	ChemBridge	3007493	170.23	-0.81	-0.83	-0.82	-1.13	-0.58	-0.855
1732	ChemBridge	4001711	246.24	-0.67	-0.75	-0.71	-0.81	-0.61	-0.71
1733	ChemBridge	3013839	180.21	-0.4	-0.58	-0.49	-0.72	-0.99	-0.855
1734	ChemBridge	4002369	162.24	0.06	-0.09	-0.015	-1.11	-0.42	-0.765
1735	ChemBridge	4002807	274.2	-0.01	-1.03	-0.52	-0.89	-0.72	-0.805
1736	ChemBridge	4003276	256.33	-0.45	-0.31	-0.38	-0.75	-0.71	-0.73
1737	ChemBridge	4004082	334.3	-0.77	-0.66	-0.715	-0.79	-0.82	-0.805
1738	ChemBridge	4003420	271.19	-0.28	-0.76	-0.52	-1.02	-0.29	-0.655
1739	ChemBridge	4013688	265.54	-0.48	-0.63	-0.555	-0.94	-0.24	-0.59
1740	ChemBridge	4015994	261.3	-0.33	-1.03	-0.68	-1.47	-0.66	-1.065
1741	ChemBridge	3013793	200.62	-0.16	-0.44	-0.3	-1.11	-0.78	-0.945
1742	ChemBridge	4001966	178.19	-0.59	-0.38	-0.485	-0.88	-0.69	-0.785
1743	ChemBridge	3013908	180.21	-0.47	-0.37	-0.42	-0.98	-0.82	-0.9
1744	ChemBridge	4002377	177.25	0.33	-0.11	0.11	-1.01	-0.53	-0.77
1745	ChemBridge	4002941	136.2	0.28	0.19	0.235	-0.5	-0.33	-0.415
1746	ChemBridge	4003278	286.35	-0.48	-1.12	-0.8	0.64	-0.69	-0.025
1747	ChemBridge	4004114	237.73	-0.04	-0.04	-0.04	-0.47	-0.59	-0.53
1748	ChemBridge	4003509	236.74	0.63	-0.38	0.125	-1.18	-0.88	-1.03
1749	ChemBridge	4013733	183.64	-0.32	-0.92	-0.62	-0.67	-0.25	-0.46
1750	ChemBridge	4015995	275.33	0.7	-0.47	0.115	-0.27	-0.57	-0.42
1751	ChemBridge	3013798	188.13	-0.66	-0.59	-0.625	-0.95	-0.65	-0.8
1752	ChemBridge	4002035	136.2	-0.51	-0.41	-0.46	-0.79	-0.77	-0.78
1753	ChemBridge	3013974	231.05	-0.01	-0.28	-0.145	-0.74	-0.82	-0.78
1754	ChemBridge	4002379	177.25	1.08	-0.23	0.425	0.07	1.09	0.58
1755	ChemBridge	4002994	276.74	0.01	-0.78	-0.385	0.27	0.92	0.595
1756	ChemBridge	4003282	272.33	0.12	-0.56	-0.22	0.61	1.43	1.02
1757	ChemBridge	4004145	207.71	1.82	0.23	1.025	-1	1.46	0.23
1758	ChemBridge	4003548	148.59	0.31	-0.6	-0.145	-0.5	1.47	0.485
1759	ChemBridge	4013734	183.64	0.21	-0.67	-0.23	-0.73	-0.69	-0.71
1760	ChemBridge	4015996	275.33	1.02	-0.73	0.145	-0.48	-0.85	-0.665
1761	ChemBridge	3013808	180.21	-0.05	-0.73	-0.39	-1.07	-0.61	-0.84
1762	ChemBridge	4002062	193.7	-0.41	0.15	-0.13	0.43	1.17	0.8
1763	ChemBridge	3013975	170.14	0.51	0.32	0.415	0.04	1.1	0.57
1764	ChemBridge	4002514	240.28	-0.02	-0.06	-0.04	0.41	1.36	0.885
1765	ChemBridge	4002998	272.33	0.35	0.27	0.31	1.09	1.33	1.21
1766	ChemBridge	4003348	186.66	0.89	0.37	0.63	0.41	0.88	0.645
1767	ChemBridge	4004211	325.05	0.4	0.32	0.36	0.19	0.82	0.505
1768	ChemBridge	4003981	243.2	0.61	-0.49	0.06	0.46	0.18	0.32
1769	ChemBridge	4013808	288.37	0.84	-0.83	0.005	-0.74	0.74	0
1770	ChemBridge	4015998	279.29	0.72	-0.37	0.175	-0.72	-0.31	-0.515
1771	ChemBridge	3013817	192.22	0.47	-0.08	0.195	1.13	1.57	1.35
1772	ChemBridge	4002073	143.14	0.33	0.37	0.35	0.28	1.71	0.995
1773	ChemBridge	3014643	190.25	0.42	0.31	0.365	0.64	0.36	0.5
1774	ChemBridge	4002518	190.29	0.34	-0.6	-0.13	0.93	1.71	1.32
1775	ChemBridge	4003005	210.11	0.26	-0.09	0.085	1.03	0.49	0.76
1776	ChemBridge	4003376	310.23	1.53	-0.33	0.6	0.28	1.16	0.72
1777	ChemBridge	4004234	213.1	0.29	-0.11	0.09	1.08	1.54	1.31
1778	ChemBridge	4004018	157.24	0.44	-0.26	0.09	0.38	1.05	0.715
1779	ChemBridge	4013810	326.37	0.53	0.55	0.54	0.73	1.32	1.025
1780	ChemBridge	4015999	279.29	0.15	-0.23	-0.04	0.49	0.83	0.66
1781	ChemBridge	3013821	204.59	-0.28	-0.12	-0.2	0.4	1.41	0.905
1782	ChemBridge	4002122	231.13	-0.25	-0.06	-0.155	0.31	1.27	0.79
1783	ChemBridge	4001640	278.16	-0.05	-0.55	-0.3	0.55	1.23	0.89
1784	ChemBridge	4002550	229.69	-0.21	-0.02	-0.115	0.06	0.27	0.165
1785	ChemBridge	4003071	195.65	0.21	-0.18	0.015	0.88	0.9	0.89
1786	ChemBridge	4003381	316.28	0.37	0.44	0.405	0	1.21	0.605
1787	ChemBridge	4004262	270.35	0.05	0.5	0.275	0.67	1.18	0.925
1788	ChemBridge	4004071	263.21	0.98	-0.36	0.31	0.73	0.98	0.855
1789	ChemBridge	4013939	231.17	-0.26	-0.28	-0.27	1.35	1.16	1.255
1790	ChemBridge	4016001	279.29	-0.14	-0.08	-0.11	1.48	1.26	1.37
1791	ChemBridge	4014670	180.03	-0.83	-1.18	-1.005	-0.68	-1.37	-1.025
1792	ChemBridge	4004273	235.16	-1.2	0.92	-0.14	-0.48	-1.77	-1.125
1793	ChemBridge	4004541	201.7	-0.53	-1.43	-0.98	-0.77	-1.84	-1.305
1794	ChemBridge	4012298	240.74	-0.76	-0.63	-0.695	-0.58	-1.95	-1.265
1795	ChemBridge	4004740	240.78	-0.7	-0.68	-0.69	-0.44	-1.35	-0.895
1796	ChemBridge	4006397	184.63	-0.49	0	-0.245	-0.17	-1.89	-1.03
1797	ChemBridge	4011413	240.18	-0.82	-0.5	-0.66	-0.33	-1.67	-1
1798	ChemBridge	4010926	162.62	0.07	0.21	0.14	-0.74	-1.84	-1.29
1799	ChemBridge	4016002	295.75	-0.91	-0.64	-0.775	-1.02	-1.89	-1.455
1800	ChemBridge	4011539	285.19	-0.64	-0.28	-0.46	-0.63	-1.28	-0.955
1801	ChemBridge	4014707	215.68	-0.73	-0.24	-0.485	-0.47	-1.84	-1.155
1802	ChemBridge	4004388	356.77	-1.07	0	-0.535	-0.61	-1.82	-1.215
1803	ChemBridge	4004552	125.17	0.62	-0.33	0.145	-0.38	-1.9	-1.14
1804	ChemBridge	4012315	167.19	-0.22	-0.37	-0.295	-0.91	-1.89	-1.4
1805	ChemBridge	4004896	252.1	-0.57	-1.51	-1.04	-0.58	-1.75	-1.165
1806	ChemBridge	4010135	260.29	-0.12	0.67	0.275	-0.2	-1.88	-1.04
1807	ChemBridge	4011487	199.7	-0.18	0.61	0.215	-0.38	-1.83	-1.105
1808	ChemBridge	4011179	237.14	0.28	0.38	0.33	-0.44	-1.26	-0.85
1809	ChemBridge	4016003	295.75	0.83	-0.49	0.17	-0.67	-1.6	-1.135
1810	ChemBridge	4011817	199.7	-0.46	-0.36	-0.41	-0.6	-1.82	-1.21
1811	ChemBridge	4014713	237.17	-0.13	-0.14	-0.135	-0.65	-1.58	-1.115
1812	ChemBridge	4004453	146.19	-0.32	0.08	-0.12	-0.55	-1.37	-0.96
1813	ChemBridge	4004617	707.89	0.25	0.21	0.23	-0.34	-1.42	-0.88
1814	ChemBridge	4012455	265.18	-0.63	-0.14	-0.385	-0.39	-1	-0.695
1815	ChemBridge	4005003	234.13	0.68	1.03	0.855	-0.44	-1.42	-0.93
1816	ChemBridge	4010250	213.13	-0.29	0.05	-0.12	-0.54	-1.5	-1.02
1817	ChemBridge	4011502	198.65	0.06	-0.17	-0.055	-0.73	-1.48	-1.105
1818	ChemBridge	4011230	249.19	0.08	0.15	0.115	-0.33	-1.1	-0.715
1819	ChemBridge	4016004	295.75	0.34	0.29	0.315	-0.32	-1.4	-0.86
1820	ChemBridge	4011850	252.19	0.16	-0.51	-0.175	-0.33	-1.29	-0.81
1821	ChemBridge	4014714	237.17	-0.47	-0.41	-0.44	-0.57	-0.82	-0.695
1822	ChemBridge	4004473	243.18	-0.88	-0.26	-0.57	-0.44	-1.2	-0.82
1823	ChemBridge	4004618	707.89	0.16	-0.27	-0.055	-0.17	-1.06	-0.615
1824	ChemBridge	4012457	205.26	0.25	2.48	1.365	0.18	-0.97	-0.395
1825	ChemBridge	4005658	212.12	1.71	0.9	1.305	1.51	0.03	0.77
1826	ChemBridge	4010336	209.12	0.61	1.7	1.155	0.87	-0.48	0.195
1827	ChemBridge	4011503	198.65	-0.35	1.63	0.64	-0.37	-0.72	-0.545
1828	ChemBridge	4011231	249.19	-0.09	0.72	0.315	-0.51	-0.98	-0.745
1829	ChemBridge	4016136	175.23	0.5	0.01	0.255	-0.6	-0.81	-0.705
1830	ChemBridge	4011872	238.16	-0.07	-0.03	-0.05	-0.37	-0.83	-0.6
1831	ChemBridge	4014715	237.17	0	0.24	0.12	-0.43	-0.8	-0.615
1832	ChemBridge	4004490	227.74	-0.36	-0.02	-0.19	-0.22	-0.52	-0.37
1833	ChemBridge	4004622	299.22	0.68	-0.71	-0.015	-0.11	-0.67	-0.39
1834	ChemBridge	4012469	207.27	1.16	2.42	1.79	0.53	-0.44	0.045
1835	ChemBridge	4005822	226.71	1.45	1.56	1.505	1.49	-0.17	0.66
1836	ChemBridge	4010400	225.68	0.47	1.57	1.02	-0.53	-0.51	-0.52
1837	ChemBridge	4011505	198.65	0.27	1	0.635	0.05	-0.24	-0.095
1838	ChemBridge	4011261	184.63	-0.03	2.49	1.23	-0.05	0.48	0.215
1839	ChemBridge	4016643	149.2	0.31	1.58	0.945	-0.23	-0.11	-0.17
1840	ChemBridge	4011913	252.19	-0.69	-0.13	-0.41	-0.21	-0.29	-0.25
1841	ChemBridge	4014750	260.17	1.87	1.21	1.54	-0.04	-0.69	-0.365
1842	ChemBridge	4004495	243.74	1.02	2.15	1.585	0.27	1.29	0.78
1843	ChemBridge	4004625	707.89	0.71	1.16	0.935	0.08	0.12	0.1
1844	ChemBridge	4012622	249.54	2.41	2.45	2.43	0.7	0.56	0.63
1845	ChemBridge	4005872	251.16	-0.07	0.5	0.215	2.06	0.98	1.52
1846	ChemBridge	4010591	275.22	1.35	1.25	1.3	0.78	0.79	0.785
1847	ChemBridge	4011506	202.62	-0.18	-0.17	-0.175	0.87	0.88	0.875
1848	ChemBridge	4011294	207.7	2.45	1.73	2.09	0.31	0.29	0.3
1849	ChemBridge	4016670	193.68	0.86	2.46	1.66	0.65	1.06	0.855
1850	ChemBridge	4012222	207.7	1.6	-0.1	0.75	0.13	-0.47	-0.17
1851	ChemBridge	4015013	251.28	3.4	0.17	1.785	1.31	1.3	1.305
1852	ChemBridge	4004501	205.3	0.88	0.8	0.84	0.7	0.71	0.705
1853	ChemBridge	4004629	198.27	1.29	1.26	1.275	0.69	0.7	0.695
1854	ChemBridge	4012623	200.67	1.59	1.05	1.32	0.02	0.04	0.03
1855	ChemBridge	4005873	269.17	1.84	1.83	1.835	2.48	1.12	1.8
1856	ChemBridge	4010695	225.72	2.88	1.32	2.1	0.67	0.69	0.68
1857	ChemBridge	4011507	202.62	2.07	0.1	1.085	0.68	0.66	0.67
1858	ChemBridge	4011295	207.7	3.11	0.81	1.96	0.58	0.6	0.59
1859	ChemBridge	4016681	207.7	3.06	1.22	2.14	-0.17	-0.18	-0.175
1860	ChemBridge	4012227	201.27	1.09	1.23	1.16	1.31	0.64	0.975
1861	ChemBridge	4015017	201.65	1.8	1.2	1.5	0.62	0.61	0.615
1862	ChemBridge	4004535	187.67	1.24	-0.06	0.59	0.56	0.57	0.565
1863	ChemBridge	4004631	194.24	1.31	0.17	0.74	0.44	0.45	0.445
1864	ChemBridge	4012625	200.67	4.3	0.72	2.51	0.28	0.27	0.275
1865	ChemBridge	4005894	231.75	1.93	1.8	1.865	0.99	0.98	0.985
1866	ChemBridge	4010855	210.71	2.41	1.43	1.92	0.56	0.57	0.565
1867	ChemBridge	4011514	228.66	0.44	1.82	1.13	0.11	0.1	0.105
1868	ChemBridge	4011409	212.12	1.63	0.09	0.86	-0.09	-0.09	-0.09
1869	ChemBridge	4017018	320.37	1.37	0.77	1.07	1.96	1.31	1.635
1870	ChemBridge	4012297	244.7	-0.14	0	-0.07	0.77	0.88	0.825
1871	ChemBridge	4013950	221.73	-1.32	-1.45	-1.385	-1.32	-0.67	-0.995
1872	ChemBridge	4017407	224.13	-1.17	-1.1	-1.135	-0.62	-0.64	-0.63
1873	ChemBridge	4100015	300.36	-1.53	-1.2	-1.365	-0.59	-0.82	-0.705
1874	ChemBridge	4022599	228.72	-1.47	-0.98	-1.225	-0.83	-0.44	-0.635
1875	ChemBridge	4100996	289.25	-1.1	-0.88	-0.99	-0.64	0.14	-0.25
1876	ChemBridge	4103036	434.34	-1.06	-1.45	-1.255	-0.97	-0.6	-0.785
1877	ChemBridge	4101562	172.66	-1.53	-1.25	-1.39	-0.03	-0.04	-0.035
1878	ChemBridge	5260769	219.24	-0.67	-1.39	-1.03	-0.75	-0.49	-0.62
1879	ChemBridge	5261123	296.42	-1.03	-1.14	-1.085	-0.6	-0.39	-0.495
1880	ChemBridge	4141599	163.61	-1.2	-1.81	-1.505	-0.84	-0.55	-0.695
1881	ChemBridge	4013951	215.73	-0.75	-0.81	-0.78	-0.63	-0.27	-0.45
1882	ChemBridge	4017446	227.16	-1.27	-0.89	-1.08	-0.63	-0.39	-0.51
1883	ChemBridge	4100048	220.27	-1.26	-0.94	-1.1	-0.8	-0.4	-0.6
1884	ChemBridge	4023161	307.22	-1.03	-0.82	-0.925	-0.57	-0.37	-0.47
1885	ChemBridge	4101049	184.63	-0.85	-1.22	-1.035	-0.44	0.31	-0.065
1886	ChemBridge	4103037	434.34	-0.48	-0.64	-0.56	-0.31	-0.49	-0.4
1887	ChemBridge	4101647	267.29	-0.94	-0.45	-0.695	-0.65	-0.31	-0.48
1888	ChemBridge	5260855	275.39	-0.65	-1.24	-0.945	-0.21	-0.71	-0.46
1889	ChemBridge	5261124	359.33	-0.9	-1.01	-0.955	-0.82	-0.61	-0.715
1890	ChemBridge	4400179	193.68	-0.76	-0.98	-0.87	-0.27	-0.23	-0.25
1891	ChemBridge	4013952	231.72	-0.96	-0.84	-0.9	-0.77	0.03	-0.37
1892	ChemBridge	4017497	192.69	-0.98	-0.93	-0.955	-0.66	-0.01	-0.335
1893	ChemBridge	4100562	225.72	-1.1	-0.69	-0.895	-0.57	-0.12	-0.345
1894	ChemBridge	4023482	297.66	-1.14	-1.07	-1.105	-0.23	0.08	-0.075
1895	ChemBridge	4101060	215.15	-0.77	-0.94	-0.855	-0.38	0.54	0.08
1896	ChemBridge	4103038	310.3	-1	-0.74	-0.87	-0.61	-0.15	-0.38
1897	ChemBridge	4101741	153.61	-0.88	-0.81	-0.845	-0.58	0.5	-0.04
1898	ChemBridge	5260861	222.31	-1.17	-0.99	-1.08	-0.48	0.35	-0.065
1899	ChemBridge	5261161	316.83	-0.78	-0.83	-0.805	-0.36	-0.16	-0.26
1900	ChemBridge	4401038	243.06	-0.79	-0.67	-0.73	-0.19	0.01	-0.09
1901	ChemBridge	4013953	201.7	-1.07	-1.03	-1.05	-0.58	-0.24	-0.41
1902	ChemBridge	4017632	192.62	-0.8	-0.37	-0.585	-0.33	1.52	0.595
1903	ChemBridge	4100850	238.12	-1.08	-0.08	-0.58	-0.31	1.67	0.68
1904	ChemBridge	4023577	199.68	-1.12	0.05	-0.535	1.24	3.54	2.39
1905	ChemBridge	4101061	201.12	-0.37	0.77	0.2	1.76	1.77	1.765
1906	ChemBridge	4103043	422.3	-0.07	-0.39	-0.23	2.2	2.69	2.445
1907	ChemBridge	4102009	216.64	-0.14	0.29	0.075	-0.16	1.08	0.46
1908	ChemBridge	5260895	274.41	-1.37	-0.67	-1.02	-0.64	2.2	0.78
1909	ChemBridge	5261176	284.38	-0.78	-0.28	-0.53	-0.28	-0.41	-0.345
1910	ChemBridge	4401040	249.09	-0.56	-0.86	-0.71	-0.48	-0.27	-0.375
1911	ChemBridge	4013988	184.2	-0.69	-0.65	-0.67	-0.55	-0.01	-0.28
1912	ChemBridge	4017709	207.7	-0.86	-1	-0.93	-0.4	-0.05	-0.225
1913	ChemBridge	4100871	162.62	-0.26	0.45	0.095	-0.43	-0.42	-0.425
1914	ChemBridge	4023581	199.68	-0.54	0.76	0.11	1.73	2.68	2.205
1915	ChemBridge	4101062	215.15	0.42	0.98	0.7	-0.93	-0.9	-0.915
1916	ChemBridge	4110558	268.58	0.68	0.8	0.74	1.82	2.18	2
1917	ChemBridge	4102204	280.28	0.51	0.01	0.26	-0.03	2.38	1.175
1918	ChemBridge	5261004	286.81	-0.54	-0.44	-0.49	0.41	2.88	1.645
1919	ChemBridge	5261236	265.33	-1.15	-0.74	-0.945	-0.31	1.83	0.76
1920	ChemBridge	4401226	237.3	-0.9	-1.06	-0.98	-0.18	0.45	0.135
1921	ChemBridge	4014266	230.72	-0.14	-0.92	-0.53	0.67	1.43	1.05
1922	ChemBridge	4018330	230.11	-0.15	0.8	0.325	1.53	2.43	1.98
1923	ChemBridge	4100928	263.26	-0.56	1.08	0.26	-1.05	0.1	-0.475
1924	ChemBridge	4023586	199.68	-0.65	-0.31	-0.48	0.55	0.54	0.545
1925	ChemBridge	4101146	226.13	0.68	0.3	0.49	-1.37	0.08	-0.645
1926	ChemBridge	4110640	208.69	-0.97	0.77	-0.1	1.59	1.32	1.455
1927	ChemBridge	4102205	262.27	-0.04	0.63	0.295	2.89	2.34	2.615
1928	ChemBridge	5261020	237.3	0.26	-0.51	-0.125	1.98	2.07	2.025
1929	ChemBridge	5261344	303.39	-0.7	-0.53	-0.615	1.37	1.36	1.365
1930	ChemBridge	4402123	220.68	-0.71	-0.08	-0.395	1.62	1.44	1.53
1931	ChemBridge	4014515	267.29	-0.76	-0.73	-0.745	2.13	2.12	2.125
1932	ChemBridge	4021719	224.74	0.25	-0.34	-0.045	1.71	2.72	2.215
1933	ChemBridge	4100989	295.34	-0.62	-0.54	-0.58	1.77	1.79	1.78
1934	ChemBridge	4023971	302.25	-0.23	-0.32	-0.275	2.23	1.3	1.765
1935	ChemBridge	4101232	263.17	-1.72	0.04	-0.84	1.69	1.68	1.685
1936	ChemBridge	4110841	242.3	-0.17	0.58	0.205	1.72	1.89	1.805
1937	ChemBridge	4102469	243.2	-0.03	-0.44	-0.235	2.45	1.43	1.94
1938	ChemBridge	5261058	246.4	-0.59	-0.06	-0.325	1.91	0.24	1.075
1939	ChemBridge	5261425	274.15	-0.34	-0.01	-0.175	2.11	0.73	1.42
1940	ChemBridge	4402939	212.21	-0.86	-0.5	-0.68	1.3	0.14	0.72
1941	ChemBridge	4014594	240.13	-0.53	-0.88	-0.705	2.27	-0.26	1.005
1942	ChemBridge	4022378	215.68	-1.86	-0.77	-1.315	2	0	1
1943	ChemBridge	4100990	313.36	-0.74	0.58	-0.08	1.66	0.15	0.905
1944	ChemBridge	4100009	420.46	-0.66	0.45	-0.105	1.72	-0.19	0.765
1945	ChemBridge	4101235	318.28	-0.75	-0.02	-0.385	1.44	0.64	1.04
1946	ChemBridge	4111312	219.29	-0.2	-0.17	-0.185	1.9	-0.1	0.9
1947	ChemBridge	4102674	213.71	-0.44	0.87	0.215	1.43	2.01	1.72
1948	ChemBridge	5261073	326.44	-0.56	-0.28	-0.42	1.8	0.07	0.935
1949	ChemBridge	5261469	204.32	-0.72	-0.16	-0.44	1.4	-0.01	0.695
1950	ChemBridge	5100126	160.18	-1.94	-0.37	-1.155	0.75	-0.43	0.16
1951	ChemBridge	5100310	189.26	-0.65	-1.41	-1.03	-0.9	-0.5	-0.7
1952	ChemBridge	5100735	259.74	-0.02	-0.83	-0.425	-0.4	0.3	-0.05
1953	ChemBridge	5260649	273.21	0	-0.42	-0.21	-0.6	-0.1	-0.35
1954	ChemBridge	5263033	270.35	-0.28	-0.49	-0.385	-0.2	-0.5	-0.35
1955	ChemBridge	5262080	325.46	-0.06	1.16	0.55	0	-0.5	-0.25
1956	ChemBridge	5261649	292.4	-0.61	0.9	0.145	-0.4	-0.2	-0.3
1957	ChemBridge	5262541	273.21	-0.37	-0.38	-0.375	-0.2	-0.4	-0.3
1958	ChemBridge	5263210	332.26	-0.52	0.43	-0.045	0	0	0
1959	ChemBridge	5263460	259.3	-0.42	-0.33	-0.375	-0.1	1.2	0.55
1960	ChemBridge	5264280	264.37	-0.57	-1.34	-0.955	0.4	0.41	0.405
1961	ChemBridge	5100322	233.27	-0.73	-0.75	-0.74	0.5	0.51	0.505
1962	ChemBridge	5101234	222.31	-0.92	-0.29	-0.605	0.1	0	0.05
1963	ChemBridge	5260651	284.38	-0.64	-0.03	-0.335	0.6	0.59	0.595
1964	ChemBridge	5263036	296.42	-0.46	-0.12	-0.29	-0.2	0	-0.1
1965	ChemBridge	5262114	226.27	-0.8	1.69	0.445	0.4	-0.2	0.1
1966	ChemBridge	5261804	317.41	-0.91	2.11	0.6	0.3	-0.2	0.05
1967	ChemBridge	5262629	294.4	-0.61	1.26	0.325	0	0	0
1968	ChemBridge	5263211	269.41	-0.45	0.39	-0.03	0	0	0
1969	ChemBridge	5263636	310.39	-0.32	0.86	0.27	0.2	0.4	0.3
1970	ChemBridge	5264317	297.36	-0.73	-0.13	-0.43	0.8	0.7	0.75
1971	ChemBridge	5100393	229.08	-0.57	-0.51	-0.54	0.4	0	0.2
1972	ChemBridge	5101326	207.27	-0.42	-0.1	-0.26	-0.3	0.2	-0.05
1973	ChemBridge	5260659	310.39	-0.46	0.1	-0.18	0.3	0	0.15
1974	ChemBridge	5263056	268.36	-0.56	0.4	-0.08	0.4	0.3	0.35
1975	ChemBridge	5262324	250.34	-0.33	1.25	0.46	0.5	0.6	0.55
1976	ChemBridge	5261820	310.44	-0.37	0.74	0.185	0.5	0.9	0.7
1977	ChemBridge	5262630	310.44	-0.96	1.35	0.195	0.3	0.7	0.5
1978	ChemBridge	5263246	315.23	-0.48	-0.05	-0.265	0.7	1.4	1.05
1979	ChemBridge	5263794	235.29	-0.04	-0.05	-0.045	0.2	0.6	0.4
1980	ChemBridge	5264322	328.43	0.52	0.53	0.525	0.4	1.4	0.9
1981	ChemBridge	5100451	239.32	-0.53	-0.41	-0.47	0.1	0.6	0.35
1982	ChemBridge	5101454	252.37	-0.34	-0.44	-0.39	0.2	0	0.1
1983	ChemBridge	5260679	296.42	0	-0.12	-0.06	0.2	0.1	0.15
1984	ChemBridge	5263058	304.8	0.07	0.4	0.235	0.4	0	0.2
1985	ChemBridge	5262387	250.41	0.35	0.46	0.405	0.1	0.1	0.1
1986	ChemBridge	5261870	283.32	0.36	-0.02	0.17	0	0.2	0.1
1987	ChemBridge	5262665	259.18	-0.1	0.58	0.24	-0.1	0.4	0.15
1988	ChemBridge	5263250	380.41	0.96	0.2	0.58	0.2	0.3	0.25
1989	ChemBridge	5263860	224.74	0.24	0.4	0.32	0.2	0.1	0.15
1990	ChemBridge	5264372	320.36	0.42	-0.18	0.12	0.4	0.7	0.55
1991	ChemBridge	5100475	213.16	-0.54	-0.49	-0.515	0.3	0.7	0.5
1992	ChemBridge	5101470	305.77	-0.02	-0.56	-0.29	0.7	0.2	0.45
1993	ChemBridge	5260693	340.47	0.15	-0.47	-0.16	0.1	-0.1	0
1994	ChemBridge	5263061	310.44	0.26	0	0.13	0	0.2	0.1
1995	ChemBridge	5262390	329.88	0.13	0.54	0.335	0.2	0.1	0.15
1996	ChemBridge	5261909	299.21	-0.07	0.19	0.06	0.2	0.4	0.3
1997	ChemBridge	5262730	378.43	0.44	-0.07	0.185	0.1	0.1	0.1
[truncated: 19,713 more rows]
