# Supplementary material for: Inhibitor of ppGalNAc-T3-mediated O-glycosylation blocks cancer cell invasiveness and lowers FGF23 levels
Source: eLife. 2017 Mar 31;6:e24051. doi: 10.7554/eLife.24051 (PMC5407854; doi:10.7554/eLife.24051)
Supplement: Figure 1—source data 2. — DOI: http://dx.doi.org/10.7554/eLife.24051.005 [file elife-24051-fig1-data2.xlsx]

## Sheet: Figure 1E-Source Data
	GalNAc T2				GalNAc T3
Compound	Repeat 1	Repeat 2	Ave	SD	Repeat 1	Repeat 2	Ave	SD
38	-0.578116	-0.477204	-0.52766	0.0713555	-0.467515	-0.451854	-0.459684	0.0110742
69	-0.717913	-0.737943	-0.727928	0.0141638	-0.627329	-0.6294	-0.628364	0.00146399
370	0.728298	0.32155	0.524924	0.287614	0.282271	0.335128	0.308699	0.0373755
356	-0.893468	-0.909288	-0.901378	0.0111867	-0.951231	-0.951691	-0.951461	0.000325331
439	2.06982	-0.0225836	1.02362	1.47955	0.369876	0.0659489	0.217913	0.214909
1148	-0.533212	-0.551382	-0.542297	0.0128479	-0.303781	-0.32352	-0.31365	0.0139576
1604	-0.536807	-0.62893	-0.582869	0.065141	-0.654399	-0.63533	-0.644865	0.0134845
1614	0.0334554	-0.0501646	-0.00835465	0.0591283	-0.989629	-1.01472	-1.00217	0.0177427
1633	-0.621811	-0.642336	-0.632074	0.0145133	-0.985279	-0.983941	-0.98461	0.000946279
1637	-0.728119	-0.713575	-0.720847	0.0102845	-0.742811	-0.749712	-0.746262	0.00487996
4541	0.318342	0.496838	0.40759	0.126216	-0.0897902	-0.0393515	-0.0645709	0.0356656
7434	-0.326757	-0.340321	-0.333539	0.00959084	-0.489333	-0.744029	-0.616681	0.180097
7544	-0.95746	-0.960543	-0.959001	0.00217974	-0.834187	-0.790067	-0.812127	0.0311976
12723	-0.569667	-0.582614	-0.576141	0.0091549	-0.141261	-0.113879	-0.12757	0.019362
18583	-0.0484359	-0.0706357	-0.0595358	0.0156976	-0.525242	-0.520361	-0.522801	0.00345143
18787	-0.284561	-0.0918264	-0.188194	0.136284	-0.770339	-0.788819	-0.779579	0.0130674
18943	-0.616549	-0.773966	-0.695257	0.11131	-0.70291	-0.811123	-0.757017	0.0765185
20679	-0.486877	0.169291	-0.158793	0.463981	-0.416861	-0.628069	-0.522465	0.149347
20956	-0.0800525	-0.16273	-0.121391	0.0584616	-0.560717	-0.523571	-0.542144	0.0262661
21545	-0.469816	-0.55643	-0.513123	0.0612455	-0.347888	-0.301911	-0.3249	0.0325102
