# Supplementary material for: Inhibitor of ppGalNAc-T3-mediated O-glycosylation blocks cancer cell invasiveness and lowers FGF23 levels
Source: eLife. 2017 Mar 31;6:e24051. doi: 10.7554/eLife.24051 (PMC5407854; doi:10.7554/eLife.24051)
Supplement: Figure 2—source data 1. — DOI: http://dx.doi.org/10.7554/eLife.24051.012 [file elife-24051-fig2-data1.xlsx]

## Sheet: Figure 2A-Source Data
			0uM	2.5uM	5uM	10uM	25uM	50uM
Repeat 1	T3Inh-1	T3 sensor	-9.99632e-05	0.0110881	0.114249	0.200544	0.868332	0.860464
	T3Inh-1	T2 sensor	-9.61075e-05	0.0583649	0.0782589	0.051223	0.0865098	-0.00993369
			0uM	2.5uM	5uM	10uM	25uM	50uM
Repeat 2	T3Inh-1	T3 sensor	7.89849e-05	0.0359004	0.0292518	0.166758	0.940182	0.956698
	T3Inh-1	T2 sensor	-8.15626e-05	-0.00466437	0.0901351	0.10548	0.228629	0.188141
			0uM	2.5uM	5uM	10uM	25uM	50uM
Repeat 2	T3Inh-1	T3 sensor	7.45033e-05	0.0618938	0.119299	0.495414	1.1712	1.15159
	T3Inh-1	T2 sensor	-3.23206e-05	0.0202161	0.08833	0.130639	0.166204	0.155769
			0	2.5	5	10	25	50
Average	T3Inh-1	T3 sensor	1.78417e-05	0.0362941	0.0875996	0.287572	0.993237	0.989583
	T3Inh-1	T2 sensor	-6.99969e-05	0.0246389	0.0855747	0.0957806	0.160448	0.111325
SD	T3Inh-1	T3 sensor	0.000102047	0.0254051	0.0505937	0.180787	0.158249	0.148321
	T3Inh-1	T2 sensor	3.34293e-05	0.0317466	0.00639961	0.0405867	0.0712344	0.106254
SEM	T3Inh-1	T3 sensor	7.21688e-05	0.0179669	0.0357806	0.127855	0.111916	0.104894
	T3Inh-1	T2 sensor	2.36416e-05	0.0224516	0.00452589	0.0287034	0.0503779	0.075144
