# Supplementary material for: Inhibitor of ppGalNAc-T3-mediated O-glycosylation blocks cancer cell invasiveness and lowers FGF23 levels
Source: eLife. 2017 Mar 31;6:e24051. doi: 10.7554/eLife.24051 (PMC5407854; doi:10.7554/eLife.24051)
Supplement: Figure 2—source data 2. — DOI: http://dx.doi.org/10.7554/eLife.24051.013 [file elife-24051-fig2-data2.xlsx]

## Sheet: Figure 2B-Source Data
Concentration(µM)		0	1.5625	3.125	6.25	12.5	25	50	100
GalNAc T2	Repeat 1	0.999992	1.20653	1.3046	1.3427	1.30239	1.26021	1.28795	1.12763
	Repeat 2	1	1.25	1.31183	1.09523	1.3919	1.52274	1.36917	1.38732
	Repeat 3	1	1.31276	1.45533	1.14181	0.962155	1.26255	0.955919	0.920331
	Average	0.999997	1.25643	1.35725	1.19325	1.21882	1.3485	1.20434	1.14509
	SD	4.57664e-06	0.0534094	0.0850145	0.13151	0.226737	0.150897	0.218941	0.233981
	SEM	2.6424e-06	0.0308369	0.0490846	0.0759293	0.13091	0.0871228	0.12641	0.135093
GalNAc T3	Repeat 1	0.999994	0.960141	0.957382	0.812248	0.53975	0.24571	0.045726	0.0144444
	Repeat 2	1	1.07985	0.75982	0.333405	0.0478433	-0.0219416	-0.0282564	-0.0755646
	Repeat 3	0.999798	0.792646	0.347498	0.344602	0.08344	0.00929355	-0.000202034	-0.0167688
	Repeat 4	1	0.815325	0.55	0.34	0.350667	0.134878	0.189277	0.0782756
	Repeat 5	0.999975	0.792011	0.644287	0.545508	0.266624	0.189845	0.172319	0.129728
	Repeat 6	0.999992	0.932693	0.833658	0.399185	0.201763	0.146487	0.0989274	0.0861894
	Average	0.99996	0.895444	0.682107	0.462491	0.248348	0.117379	0.0796319	0.0360506
	SD	7.9819e-05	0.115985	0.217085	0.1891	0.181816	0.103891	0.0896084	0.0758774
	SEM	3.25792e-05	0.0473407	0.088606	0.0771838	0.0742106	0.0424044	0.0365749	0.0309704
GalNAc T6	Repeat 1	1	1.24744	0.895678	1.00716	1.0493	1.09686	1.04958	1.26629
	Repeat 2	1	0.980513	1.20985	0.821488	0.859016	1.0628	1.15443	1.06225
	Repeat 3	0.999985	0.9595	1.25581	1.28192	1.27187	1.35154	1.18161	1.11227
	Average	0.999995	1.06249	1.12045	1.03686	1.06006	1.1704	1.12854	1.14694
	SD	8.41398e-06	0.160523	0.196006	0.23165	0.206636	0.157793	0.0697186	0.106342
	SEM	4.85795e-06	0.0926806	0.113167	0.133747	0.119305	0.0911046	0.0402532	0.0613983
