# Supplementary material for: Inhibitor of ppGalNAc-T3-mediated O-glycosylation blocks cancer cell invasiveness and lowers FGF23 levels
Source: eLife. 2017 Mar 31;6:e24051. doi: 10.7554/eLife.24051 (PMC5407854; doi:10.7554/eLife.24051)
Supplement: Figure 2—source data 3. — DOI: http://dx.doi.org/10.7554/eLife.24051.014 [file elife-24051-fig2-data3.xlsx]

## Sheet: Figure 2C-Source Data
	0µM T3Inh-1						7.5µM T3Inh-1						15µM T3Inh-1
Peptice Concentration (μM)	Repeat 1	Repeat 2	Repeat 3	Average	SD	SEM	Repeat 1	Repeat 2	Repeat 3	Average	SD	SEM	Repeat 1	Repeat 2	Repeat 3	Average	SD	SEM
0	0.0140819	0.0150853	0.0147948	0.014654	0.000516305	0.000365138	0.00800398	0.00778455	0.00750044	0.00776299	0.000252462	0.000178544	0.00163783	0.00178121	0.00133971	0.00158625	0.000225224	0.000159282
3.90625	0.0354873	0.0375216	0.0381656	0.0370582	0.00139803	0.000988704	0.0224124	0.0225526	0.0224208	0.0224619	7.85964e-05	5.55845e-05	0.0116276	0.0120946	0.0109721	0.0115648	0.000563903	0.0003988
7.8125	0.0557721	0.0566783	0.0567895	0.0564133	0.000558071	0.000394675	0.0404573	0.0382724	0.0390352	0.039255	0.0011089	0.000784227	0.0192517	0.0190121	0.0180539	0.0187726	0.00063383	0.000448253
15.625	0.112757	0.106998	0.109193	0.109649	0.00290659	0.00205558	0.0593642	0.058205	0.0579875	0.0585189	0.000740074	0.00052339	0.0233128	0.0227442	0.0228781	0.0229784	0.000297242	0.000210214
31.25	0.196987	0.179007	0.182532	0.186175	0.00952761	0.00673805	0.130123	0.13972	0.142061	0.137301	0.00632571	0.00447363	0.0396049	0.0400317	0.0395472	0.0397279	0.000264631	0.000187151
62.5	0.344772	0.335637	0.343236	0.341215	0.00489132	0.00345921	0.17777	0.1621	0.164952	0.168274	0.00834683	0.00590299	0.070497	0.0724453	0.0717904	0.0715776	0.000991428	0.000701151
125	0.454049	0.448224	0.455157	0.452477	0.00372438	0.00263393	0.375507	0.366169	0.372546	0.371407	0.00477208	0.00337488	0.159464	0.146345	0.145809	0.150539	0.00773321	0.00546903
250	0.628408	0.629392	0.637615	0.631805	0.00505541	0.00357526	0.504724	0.48131	0.490269	0.492101	0.0118138	0.00835488	0.213008	0.203579	0.200557	0.205715	0.00649404	0.00459267
500	0.783517	0.754061	0.767464	0.768347	0.0147477	0.0104298	0.636526	0.648467	0.652497	0.64583	0.00830558	0.00587382	0.349027	0.331921	0.328638	0.336529	0.0109479	0.00774253
1000	0.999936	1	1	0.999979	3.68632e-05	2.60702e-05	0.810449	0.726473	0.724371	0.753764	0.0491017	0.0347254	0.290765	0.29771	0.289323	0.292599	0.00448465	0.00317161
