# Supplementary material for: Inhibitor of ppGalNAc-T3-mediated O-glycosylation blocks cancer cell invasiveness and lowers FGF23 levels
Source: eLife. 2017 Mar 31;6:e24051. doi: 10.7554/eLife.24051 (PMC5407854; doi:10.7554/eLife.24051)
Supplement: Figure 2—source data 4. — DOI: http://dx.doi.org/10.7554/eLife.24051.015 [file elife-24051-fig2-data4.xlsx]

## Sheet: Figure 2D-Source Data 
	0µM T3Inh-1						7.5µM T3Inh-1						15µM T3Inh-1
UDP-GalNAc concentration (μM)	Repeat 1	Repeat 2	Repeat 3	Average	SD	SEM	Repeat 1	Repeat 2	Repeat 3	Average	SD	SEM	Repeat 1	Repeat 2	Repeat 3	Average	SD	SEM
0	1.89469e-05	-6.31991e-05	0.000197082	5.09432e-05	0.000133058	9.41002e-05	-0.000227363	6.95191e-05	0.000183005	8.3868e-06	0.000211904	0.000149861	-0.000284204	-0.000132718	4.22318e-05	-0.000124897	0.000163358	0.000115529
3.125	0.0519462	0.0486949	0.0474756	0.0493722	0.00231096	0.00163434	0.0205258	0.020426	0.0216579	0.0208699	0.000684241	0.000483904	0.00841875	0.00747646	0.00777065	0.00788862	0.000482096	0.000340945
6.25	0.0873517	0.0834861	0.0841539	0.0849972	0.00206617	0.00146123	0.0393212	0.0383429	0.040634	0.0394327	0.00114963	0.00081303	0.0165912	0.0167667	0.0170476	0.0168018	0.000230206	0.000162805
12.5	0.123483	0.114605	0.120642	0.119577	0.00453391	0.00320644	0.0720994	0.0719838	0.0755457	0.0732096	0.0020239	0.00143133	0.0299425	0.026689	0.0282601	0.0282972	0.00162705	0.00115067
25	0.269394	0.266391	0.266778	0.267521	0.00163346	0.0011552	0.124134	0.121753	0.127019	0.124302	0.00263706	0.00186496	0.0576745	0.0567844	0.0582588	0.0575726	0.000742441	0.000525064
50	0.453975	0.430114	0.447615	0.443901	0.0123561	0.00873837	0.228342	0.21925	0.233	0.226864	0.00699287	0.00494545	0.0799118	0.0792454	0.0816622	0.0802732	0.00124828	0.000882799
100	0.623386	0.579644	0.624545	0.609191	0.0255958	0.0181017	0.308285	0.288978	0.30295	0.300071	0.00997043	0.00705122	0.116505	0.10924	0.114856	0.113534	0.00380885	0.00269367
200	0.748802	0.730645	0.752803	0.744083	0.0118084	0.00835109	0.399149	0.398629	0.418658	0.405478	0.0114168	0.00807414	0.160878	0.148745	0.151063	0.153562	0.00644097	0.00455514
400	0.828069	0.843178	0.831136	0.834128	0.00798612	0.00564789	0.447754	0.424869	0.436853	0.436492	0.0114468	0.0080953	0.269766	0.268647	0.272958	0.270457	0.00223716	0.00158215
800	1	1	1	1	0	0	0.709392	0.683486	0.708051	0.70031	0.0145852	0.0103149	0.388298	0.371959	0.377588	0.379281	0.00830058	0.00587028
