# Supplementary material for: Inhibitor of ppGalNAc-T3-mediated O-glycosylation blocks cancer cell invasiveness and lowers FGF23 levels
Source: eLife. 2017 Mar 31;6:e24051. doi: 10.7554/eLife.24051 (PMC5407854; doi:10.7554/eLife.24051)
Supplement: Figure 2—source data 5. — DOI: http://dx.doi.org/10.7554/eLife.24051.016 [file elife-24051-fig2-data5.xlsx]

## Sheet: Figure 2E and F-Source Data
	Wavelength	300	302	304	306	308	310	312	314	316	318	320	322	324	326	328	330	332	334	336	338	340	342	344	346	348	350	352	354	356	358	360	362	364	366	368	370	372	374	376	378	380	382	384	386	388	390	392	394
T3Inh-1 Only	500	248	193	140	129	89	122	149	192	371	726	848	811	486	306	169	99	129	119	85	103	134	115	106	84	114	72	80	71	71	59	73	64	69	74	57	57	64	63	53	55	46	54	56	51	55	53	50	45
	250	280	236	207	210	192	283	280	495	889	1444	1809	1655	1085	595	341	239	284	301	260	274	258	263	184	242	191	220	185	180	166	168	185	175	161	168	176	144	155	166	137	143	129	129	121	128	109	131	116	113
	125	361	319	273	325	319	434	381	584	1067	1732	1970	1795	1222	762	501	429	425	428	367	359	398	322	334	329	297	247	289	283	276	266	279	254	221	234	249	244	206	229	205	225	188	196	194	183	176	168	171	150
	62.5	465	413	450	404	463	483	545	953	1646	2671	3159	2792	2038	1235	804	737	706	671	605	629	608	593	555	504	510	541	519	524	461	499	472	486	440	443	439	459	389	409	393	412	364	368	340	314	331	320	322	290
	31.25	554	477	574	583	750	699	757	1116	1965	3021	3790	3533	2303	1399	924	852	809	781	740	790	725	698	751	707	629	639	733	664	649	629	627	594	555	603	522	524	540	513	544	498	480	444	417	412	414	395	366	363
	15.625	680	465	643	763	778	765	902	1240	2381	3449	4365	3686	2702	1686	1060	1026	960	1001	1019	966	902	857	885	823	832	766	784	785	769	751	693	700	773	720	685	647	639	648	550	574	519	548	474	505	473	439	427	397
	7.8125	751	629	762	750	798	819	986	1417	2301	3494	4400	3883	2574	1753	1188	1094	1040	1006	1013	930	983	891	869	874	901	834	793	841	813	777	780	737	705	728	699	673	644	641	618	610	572	535	516	515	496	486	471	458
	3.90625	676	724	805	752	975	900	995	1382	2556	3806	4661	4111	3013	1908	1334	1188	1117	1110	1079	1072	1010	940	1110	957	944	898	892	904	859	837	883	835	812	805	815	784	762	708	666	649	618	597	530	557	542	510	529	505
	1.95312	787	660	751	756	821	988	1064	1467	2429	3821	4759	4427	2929	1868	1233	1185	1158	1102	1149	1102	983	1045	1006	982	1006	945	926	866	839	895	851	817	829	810	792	739	737	729	737	633	616	596	585	550	532	491	486	479
	0	715	780	790	884	893	983	1093	1591	2614	4012	5082	4602	3125	2128	1559	1254	1096	1247	1161	1211	1132	1125	1070	1058	1029	987	1004	976	984	923	977	820	803	816	821	838	778	807	702	693	668	624	612	550	530	503	515	503
T3Inh-1+GalNAc-T3	500	817	831	1082	1055	1045	1252	1307	1418	1842	2148	2204	1976	1648	1543	1575	1582	1580	1787	1949	2149	2435	2804	2920	3156	3668	3836	4140	4448	4696	5033	5447	5603	5761	6007	6026	6002	6222	6055	5888	5627	5442	5239	4713	4598	4233	4007	3811	3579
	250	913	965	1249	1481	1450	1545	1811	1952	2160	2421	2859	2666	2334	2191	2132	1952	2187	2315	2320	2768	2939	3385	3467	3941	4235	4823	4821	5579	5764	6090	6481	6671	6855	7353	7551	7381	7261	7313	7144	6813	6573	6368	5786	5556	5288	4931	4686	4400
	125	1218	1775	1947	2102	2021	2131	2649	2819	3391	3863	4267	4293	3520	3247	3112	3182	3381	3582	3827	4144	4478	5100	5355	5855	6440	6938	7310	7925	8415	9011	9162	9789	9845	10388	10657	10646	10466	10440	10318	9725	9356	8888	8362	7854	7299	6986	6444	6125
	62.5	2218	3114	3899	3889	4121	4757	5289	5785	6883	7427	8072	7920	7279	6601	6669	6684	7019	7404	7192	7717	8229	8916	9543	9458	10314	11028	11433	12459	12979	13354	14115	14563	14828	15000	15217	15232	14974	14860	14338	13904	12881	12461	11577	10886	10174	9480	9069	8155
	31.25	4348	5895	6771	7318	7793	8565	9956	10675	12437	13483	14222	13970	13026	12700	12430	12434	12023	12710	12949	13199	13722	14434	14664	14784	15682	16483	17134	17429	18146	18804	19226	19556	19962	20345	20205	20120	19703	19218	18368	17258	16372	15763	14584	13817	12653	11869	11281	10464
	15.625	5363	7481	8809	10095	11624	12361	13971	15637	17018	18543	19470	19443	18667	18287	17705	17199	17200	17350	17697	18029	18120	18725	19254	19509	20510	21061	21376	21627	22410	23179	23269	23803	24151	24543	24230	23911	23371	22340	21419	20173	19176	17955	16667	15389	14807	13952	12715	11962
	7.8125	6716	9828	11489	12622	14643	15153	18102	19074	21353	22951	23997	23726	23207	22604	21901	21882	22520	21768	21751	22175	22145	22917	23163	23098	24606	24680	24488	25417	25672	26172	26784	26992	27118	27271	26737	26411	25295	24722	23867	22394	21094	19251	18265	17158	15833	14940	13810	13089
	3.90625	7242	10688	12724	14020	15078	16691	19617	21224	23815	25046	26156	26614	25298	24696	24663	24366	23900	24249	24133	24805	24090	24664	25321	25613	26216	26144	26999	26901	27890	27547	28856	28630	28514	28460	28467	27802	26838	25881	24857	23318	21613	20053	18791	17745	16466	15579	14323	13372
	1.95312	8390	11747	13798	15688	16754	19151	21644	23764	25768	27945	29052	28331	27801	26998	26626	26703	25944	26042	26261	26104	27084	27424	26837	27020	28117	28096	28672	28686	28940	29235	29940	30135	30030	29718	29232	29062	27493	26726	25761	23829	22197	20971	19465	18131	16758	15524	14453	13582
	0	9092	13176	16175	17242	18995	20775	23861	26552	28167	31137	31773	31747	32496	31003	29509	29812	29961	29808	29741	28891	29753	29710	29491	29780	29912	29968	30397	30324	30883	30599	30857	30952	30358	30382	30138	28916	27901	26794	25297	24311	21950	20926	19306	17904	16551	15640	14343	13386
	Repeat 1	Repeat 2	Repeat 3	Average	SD	SEM
0	0	0	0	0	0	0
1.95	0.159488	0.1474	0.137985	0.148291	0.0107791	0.00762313
3.91	0.251196	0.258626	0.250968	0.253597	0.00435689	0.00308125
7.81	0.309759	0.309509	0.321532	0.3136	0.00687052	0.00485892
15.63	0.475238	0.488551	0.462009	0.475266	0.0132711	0.00938547
31.25	0.661066	0.701344	0.666116	0.676175	0.0219424	0.015518
62.5	0.855401	0.910121	0.885717	0.883746	0.0274132	0.019387
125	0.959729	0.99523	0.982285	0.979081	0.0179658	0.0127056
250	0.996916	1.04882	1.02855	1.02476	0.0261565	0.0184982
500	1	1	1	1	0	0
[truncated: 28 more columns]
