# Supplementary material for: Inhibitor of ppGalNAc-T3-mediated O-glycosylation blocks cancer cell invasiveness and lowers FGF23 levels
Source: eLife. 2017 Mar 31;6:e24051. doi: 10.7554/eLife.24051 (PMC5407854; doi:10.7554/eLife.24051)
Supplement: Figure 3—source data 1. — DOI: http://dx.doi.org/10.7554/eLife.24051.019 [file elife-24051-fig3-data1.xlsx]

## Sheet: Figure 3A-Source Data 
Repeat 1	Field	1	2	3	4	5	6	7	8	9	10	Average	SD
	0uM	47	32	36	55	30	36	35	35	49	72	42.7	13.1322
	5uM	6	9	15	14	15	10	7	3	12	12	10.3	4.05654
Repeat 2	Field	1	2	3	4	5	6	7	8	9	10	Average	SD
	0uM	98	102	116	129	122	112	114	161	147	98	119.9	20.8244
	5uM	25	12	16	16	25	22	23	17	25	12	19.3	5.29255
Repeat 3	Field	1	2	3	4	5	6	7	8	9	10	Average	SD
	0uM	175	189	187	176	197	189	174	150	118	147	170.2	24.6071
	5uM	17	20	18	24	19	13	29	29	27	27	22.3	5.63816
		0 µM	5 µM		Normalized		0 µM	5 µM			Control	T3Inh-1
24h	Repeat 1	42.7	10.3		24h	Repeat 1	1	0.241218		Average	1	0.177736
	Repeat 2	119.9	19.3			Repeat 2	1	0.160967		SEM	0	0.0402966
	Repeat 3	170.2	22.3			Repeat 3	1	0.131022
						Average	1	0.177736
						SD	0	0.0569793
						SEM	0	0.0402966
