# Supplementary material for: Inhibitor of ppGalNAc-T3-mediated O-glycosylation blocks cancer cell invasiveness and lowers FGF23 levels
Source: eLife. 2017 Mar 31;6:e24051. doi: 10.7554/eLife.24051 (PMC5407854; doi:10.7554/eLife.24051)
Supplement: Figure 3—source data 2. — DOI: http://dx.doi.org/10.7554/eLife.24051.020 [file elife-24051-fig3-data2.xlsx]

## Sheet: Figure 3B-Source Data 
Repeat 1	Field	1	2	3	4	5	6	7	8	9	10	Average	SD
24h	0uM	22	21	22	18	37	20	18	22	29	22	23.1	5.76291
	5uM	1	1	2	0	0	0	1	0	1	0	0.6	0.699206
48h	0uM	107	98	93	117	103	131	110	96	99	97	105.1	11.6757
	5uM	0	1	3	0	0	0	2	1	4	2	1.3	1.41814
Repeat 2	Field	1	2	3	4	5	6	7	8	9	10	Average	SD
24h	0uM	148	126	154	167	153	135	180	139	136	181	151.9	19.0348
	5uM	5	7	5	5	3	6	7	4	1	3	4.6	1.89737
48h	0uM	554	480	560	635	610	634	650	454	633	645	585.5	71.0434
	5uM	13	17	2	2	10	33	7	13	18	16	13.1	9.04863
Repeat 3	Field	1	2	3	4	5	6	7	8	9	10	Average	SD
24h	0uM	35	36	35	42	29	31	33	30	32	37	34	3.85861
	5uM	2	1	2	2	0	3	2	0	0	2	1.4	1.07497
48h	0uM	145	159	163	135	160	156	173	164	151	142	154.8	11.5258
	5uM	0	2	5	4	1	2	0	0	1	0	1.5	1.77951
		0 µM	5 µM		Normalized		0 µM	5 µM			Control	T3Inh-1
24h	Repeat 1	23.1	0.6		24h	Repeat 1	0.219791	0.00570885		24 h	0.232955	0.00753644	0.0162189	0.00119549
	Repeat 2	151.9	4.6			Repeat 2	0.259436	0.00785653		48 h	1	0.014811	0	0.00472796
	Repeat 3	34	1.4			Repeat 3	0.219638	0.00904393
	Average					Average	0.232955	0.00753644
	SD					SD	0.0229336	0.00169042
	SEM					SEM	0.0162189	0.00119549
48h	Repeat 1	105.1	1.3		48h	Repeat 1	1	0.0123692
	Repeat 2	585.5	13.1			Repeat 2	1	0.022374
	Repeat 3	154.8	1.5			Repeat 3	1	0.00968992
	Average					Average	1	0.014811
	SD					SD	0	0.00668534
	SEM					SEM	0	0.00472796
