# Supplementary material for: Inhibitor of ppGalNAc-T3-mediated O-glycosylation blocks cancer cell invasiveness and lowers FGF23 levels
Source: eLife. 2017 Mar 31;6:e24051. doi: 10.7554/eLife.24051 (PMC5407854; doi:10.7554/eLife.24051)
Supplement: Figure 3—source data 3. — DOI: http://dx.doi.org/10.7554/eLife.24051.021 [file elife-24051-fig3-data3.xlsx]

## Sheet: Figure 3C-Source Data 
Normalized		0 µM	5 µM
24h	Repeat 1	0.506623	0.615894
	Repeat 2	0.357992	0.367239
	Repeat 3	0.358707	0.421272
	Average	0.407774	0.468135
	SD	0.0856062	0.130784
	SEM	0.0605419	0.0924921
48h	Repeat 1	1	0.990066
	Repeat 2	1	0.996037
	Repeat 3	1	0.957247
	Average	1	0.981117
	SD	0	0.0208862
	SEM	0	0.014771
