# Supplementary material for: Inhibitor of ppGalNAc-T3-mediated O-glycosylation blocks cancer cell invasiveness and lowers FGF23 levels
Source: eLife. 2017 Mar 31;6:e24051. doi: 10.7554/eLife.24051 (PMC5407854; doi:10.7554/eLife.24051)
Supplement: Figure 3—source data 4. — DOI: http://dx.doi.org/10.7554/eLife.24051.022 [file elife-24051-fig3-data4.xlsx]

## Sheet: Figure 3D-Source Data
Repeat 1-Invasion	1	2	3	4	5	6	7	8	9	10	Average	SD		Repeat 1-Proliferation			Normalized	Repeat 1	Repeat2	Repeat3	Average	SD	SEM
MCF7	9	8	9	8	9	9	8	7	8	8	8.3	0.674949		MCF7	125		MCF7	1	0.999996	1	0.999999	2.33862e-06	1.35025e-06
MCF7+5μM T3Inh-1	2	2	1	4	1	1	4	4	3	1	2.3	1.33749		MCF7+5uM	124		MCF7+5uM	0.279343	0.266472	0.211741	0.252519	0.0358961	0.0207252
MCF7+GalNAcT3	54	16	42	41	25	25	36	58	53	52	40.2	14.4515		MCF7+GalNAcT3	133		MCF7+GalNAcT3	4.55204	3.49292	2.02349	3.35615	1.26981	0.733149
MCF7+GalNAcT3+5μM T3Inh-1	12	12	6	7	1	3	6	1	1	0	4.9	4.4833		MCF7+GalNAcT3+5uM	130		MCF7+GalNAcT3+5uM	0.567655	0.339827	0.0918221	0.333101	0.237988	0.137406
Repeat 2-Invasion	1	2	3	4	5	6	7	8	9	10	Average	SD		Repeat 2-Proliferation
MCF7	16	35	30	8	27	32	18	18	23	30	23.7	8.55115		MCF7	224
MCF7+5μM T3Inh-1	6	8	4	6	4	5	8	8	7	8	6.4	1.64655		MCF7+5uM	227
MCF7+GalNAcT3	33	28	26	33	40	24	14	55	43	44	34	11.8322		MCF7+GalNAcT3	92
MCF7+GalNAcT3+5μM T3Inh-1	3	3	4	5	4	4	3	2	3	1	3.2	1.13529		MCF7+GalNAcT3+5uM	89
Repeat 3-Invasion	1	2	3	4	5	6	7	8	9	10	Average	SD		Repeat 3-Proliferation
MCF7	22	17	22	22	18	22	18	22	23	19	20.5	2.22361		MCF7	320
MCF7+5μM T3Inh-1	4	8	2	4	5	5	4	3	5	3	4.3	1.63639		MCF7+5uM	317
MCF7+GalNAcT3	24	24	28	19	18	16	24	19	19	19	21	3.74166		MCF7+GalNAcT3	162
MCF7+GalNAcT3+5μM T3Inh-1	2	1	2	0	1	0	0	1	2	1	1	0.816497		MCF7+GalNAcT3+5uM	170
																					Control	T3Inh-1
																				MCF-7	0.999999	0.252519	1.35025e-06
																				MCF-7+GalNAc T3	3.35615	0.333101	0.733149
																												D
