# Supplementary material for: Inhibitor of ppGalNAc-T3-mediated O-glycosylation blocks cancer cell invasiveness and lowers FGF23 levels
Source: eLife. 2017 Mar 31;6:e24051. doi: 10.7554/eLife.24051 (PMC5407854; doi:10.7554/eLife.24051)
Supplement: Figure 4—figure supplement 1—source data 1. — DOI: http://dx.doi.org/10.7554/eLife.24051.028 [file elife-24051-fig4-figsupp1-data1.xlsx]

## Sheet: Sheet1
Cell Media									Cell Lysates
	Concentration (uM)	0	1	5	10	25				Concentration (uM)	0	1	5	10	25
Cleaved	Repeat1	25299602	35867445	38025984	34404500	35281932			Repeat 1	Intact FGF23	17326980	14705988	13337214	10947024	19214316
	Repeat 2	7.20012e+07	78385039	75939284	8.38793e+07	75034872			Repeat 2	Intact FGF23	20083754	22813598	25384561	26985456	18568974
	Repeat 3	3.4413e+07	3.60342e+07	4.70972e+07	43335798	40018902			Repeat 3	Intact FGF23	24688884	21019746	23159466	19294770	23241042
	Average	4.39046e+07	5.00955e+07	5.36875e+07	5.38732e+07	50111902				Average	2.06999e+07	1.95131e+07	2.06271e+07	19075750	20341444
	SEM	1.42925e+07	1.41448e+07	1.14299e+07	1.5223e+07	1.25363e+07				SEM	2.14741e+06	2.45871e+06	3.7011e+06	4.63119e+06	1.46172e+06
										Concentration (uM)	0	1	5	10	25
Intact	Repeat1	19832000	27247761	24188340	17454907	11934375			Repeat 1	Cleaved FGF23	4411242	4670490	3294751	3503678	3531264
	Repeat 2	40916471	47541053	37893558	24185100	23236314			Repeat 2	Cleaved FGF23	2462129	1693406	2542841	1561708	2998912
	Repeat 3	29651762	31197780	32612586	29055312	20992422			Repeat 3	Cleaved FGF23	214863	304040	566200	210035	277017
	Average	30133411	3.53289e+07	31564828	2.35651e+07	18721037				Average	2.36274e+06	2.22265e+06	2.1346e+06	1.75847e+06	2.26906e+06
	SEM	6.09132e+06	6.21165e+06	3.99089e+06	3.36307e+06	3.4546e+06				SEM	1.21241e+06	1.28796e+06	813684	955869	1.00781e+06
total-rpt1 (intact+cleaved at 0µM)	Concentration (uM)	0	1	5	10	25			total-rpt1	Concentration (uM)	0	1	5	10	25
45131602	Cleaved (%total) rpt1	0.560574	0.79473	0.842558	0.762315	0.781757			21738222	Intact (%total)	0.797074	0.676504	0.613537	0.503584	0.883895
total-rpt2	Cleaved (%total) rpt2	0.637643	0.694179	0.672519	0.742836	0.664509			total-rpt2		0.890795	1.01187	1.12591	1.19691	0.823608
1.12918e+08	Cleaved (%total) rpt3	0.537159	0.562465	0.73515	0.676438	0.624664			22545883		0.991372	0.844039	0.929959	0.774774	0.933235
total-rpt3	Average	0.578459	0.683791	0.750076	0.727196	0.69031			total-rpt3	Average	0.89308	0.844139	0.889801	0.82509	0.880246
6.40647e+07	SEM	0.0303544	0.06725	0.0496501	0.0259947	0.047148			24903747	SEM	0.0561006	0.0968131	0.149265	0.201722	0.031699
	Intact (%total) rpt1	0.439426	0.60374	0.535951	0.386756	0.264435				Cleaved (%total)	0.202926	0.214852	0.151565	0.161176	0.162445
	Intact (%total) rpt2	0.362357	0.421024	0.335586	0.214183	0.205781					0.109205	0.0751093	0.112785	0.069268	0.133014
	Intact (%total) rpt3	0.462841	0.486973	0.509057	0.453531	0.327675					0.00862774	0.0122086	0.0227355	0.00843387	0.0111235
	Average	0.421541	0.503912	0.460198	0.35149	0.265964				Average	0.10692	0.100723	0.0956952	0.0796259	0.102194
	SEM	0.0303544	0.0534213	0.062788	0.0713081	0.0351961				SEM	0.0561006	0.0598835	0.0381589	0.0443959	0.0463211
