# Supplementary material for: Inhibitor of ppGalNAc-T3-mediated O-glycosylation blocks cancer cell invasiveness and lowers FGF23 levels
Source: eLife. 2017 Mar 31;6:e24051. doi: 10.7554/eLife.24051 (PMC5407854; doi:10.7554/eLife.24051)
Supplement: Figure 4—source data 1. — DOI: http://dx.doi.org/10.7554/eLife.24051.025 [file elife-24051-fig4-data1.xlsx]

## Sheet: Figure 4B-Source Data 
FGF23	T3Inh-1 (μM)	0	1	5	10	25	50	100	HEK-DT3
	Repeat 1	1	1.03186	1.23233	1.54508	2.31742	1.90162	1.58688	2.06
	Repeat 2	1	0.936964	1.13883	1.9709	1.83508	3.66865	3.25487	4.94808
	Repeat 3	1	0.995221	1.24434	1.28514	1.6426	2.26302	2.19024	3.35166
	Average	1	0.988016	1.20517	1.60037	1.9317	2.6111	2.344	3.45324
	SD	2.2152e-07	0.0478585	0.0577607	0.346211	0.347634	0.933526	0.844557	1.44672
	SEM	1.27899e-07	0.027632	0.0333491	0.199891	0.200713	0.538987	0.48762	0.835287
ANGPTL3	T3Inh-1 (μM)	0	1	5	10	25	50	100	HEK-DT2
	Repeat 1	0.999918	0.972506	0.920999	1.51463	0.985242	1.1566	1.61177	4.83618
	Repeat 2	1.00001	0.539509	0.720292	0.921895	0.927005	0.522578	1.21544	2.29147
	Repeat 3	1	1.26186	1.30598	1.08578	1.95589	1.38576	1.54459	5.29218
	Average	0.999975	0.924624	0.982424	1.1741	1.28938	1.02164	1.45727	4.13994
	SD	4.91633e-05	0.363547	0.297637	0.306078	0.577948	0.447135	0.212107	1.61698
	SEM	2.83853e-05	0.2099	0.171846	0.176719	0.333688	0.258161	0.122464	0.93359
