# Supplementary material for: Inhibitor of ppGalNAc-T3-mediated O-glycosylation blocks cancer cell invasiveness and lowers FGF23 levels
Source: eLife. 2017 Mar 31;6:e24051. doi: 10.7554/eLife.24051 (PMC5407854; doi:10.7554/eLife.24051)
Supplement: Figure 4—source data 2. — DOI: http://dx.doi.org/10.7554/eLife.24051.026 [file elife-24051-fig4-data2.xlsx]

## Sheet: Figure 4C-Source Data
1*IP	C-terminal FGF23 (pg/ml)	Intact FGF23 (pg/ml)	Cleaved FGF23 (pg/ml)	Ratio	Average-Ratio	STD
Control-1	397.737	322.4	75.3369	0.233675
Control-2	385.579	315	70.5789	0.22406
Control-3	477	359.6	117.4	0.326474
Control-4	382.421	261.2	121.221	0.464093	0.312075	0.11137
25mg/kg-1	1091.84	265.4	826.442	3.11395
25mg/kg-2	1094.84	300.8	794.042	2.63977
25mg/kg-3	849.316	381.4	467.916	1.22684
25mg/kg-4	786.789	309.8	476.989	1.53967	2.13006	0.892975
50mg/kg-1	1038.63	282	756.632	2.68309
50mg/kg-2	1924.89	281.2	1643.69	5.84529
50mg/kg-3	1048.26	307.2	741.063	2.41231
50mg/kg-4	1113	305.067	807.933	2.64838	3.39727	1.63644
2*IP	C-terminal FGF23 (pg/ml)	Intact FGF23 (pg/ml)	Cleaved FGF23 (pg/ml)	Ratio	Average-Ratio	STD
Control-1	303.5	157.6	145.9	0.925761
Control-2	260	154.9	105.1	0.678502
Control-3	376.857	192.2	184.657	0.960755
Control-4	298.286	150	148.286	0.988571	0.888398	0.14227
25mg/kg-1	748.357	231	517.357	2.23964
25mg/kg-2	659.143	193	466.143	2.41525
25mg/kg-3	584.643	203.7	380.943	1.87012
25mg/kg-4	849.786	286.2	563.586	1.9692	2.12355	0.14227
50mg/kg-1	2468.71	358.6	2110.11	5.88431
50mg/kg-2	2744.64	586.4	2158.24	3.6805
50mg/kg-3	3137.43	426.6	2710.83	6.3545
50mg/kg-4	822.357	254.1	568.257	2.23635	4.53891	1.92744
