# Supplementary figures and images for: Inhibitor of ppGalNAc-T3-mediated O-glycosylation blocks cancer cell invasiveness and lowers FGF23 levels
Source: eLife journal article supplement (doi:10.7554/elife.24051), 2017-03-31

**Fig1-figure supplement 1**

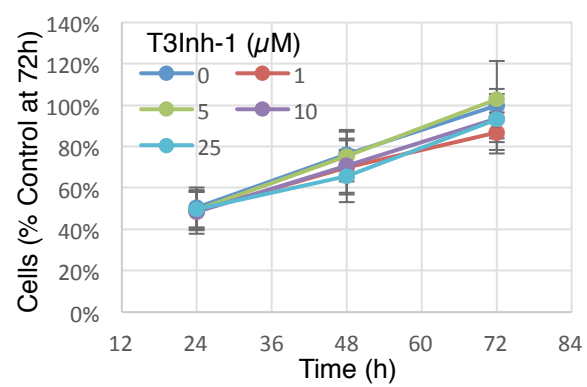

Supplement: supp [file elife_poa_e24051_Figure_1_Figure_Supplement_1.pdf › elife_poa_e24051_Figure_1_Figure_Supplement_1.pdf]

**Fig1-figure supplement 2**

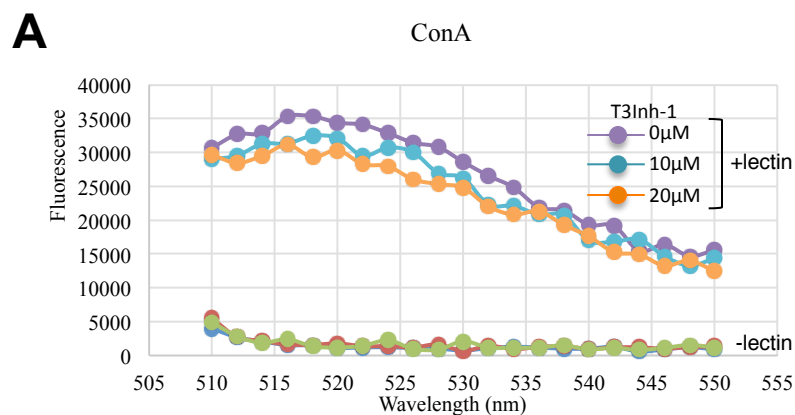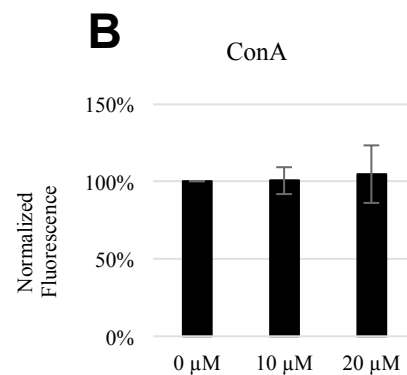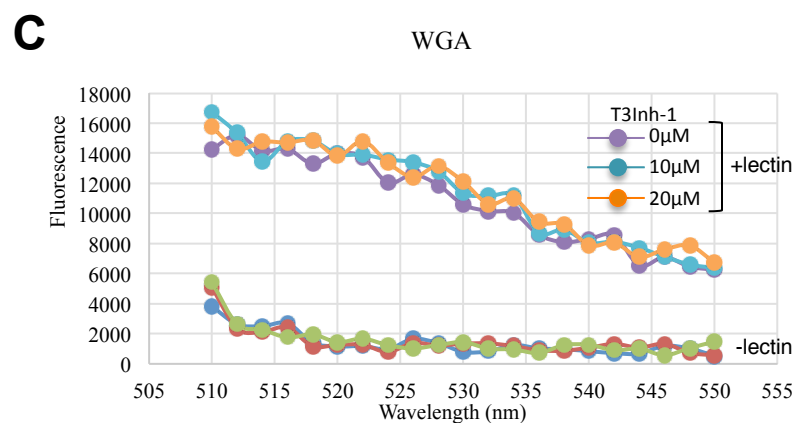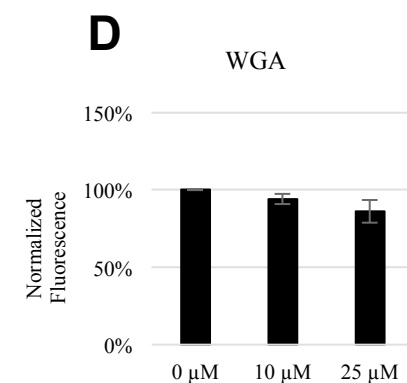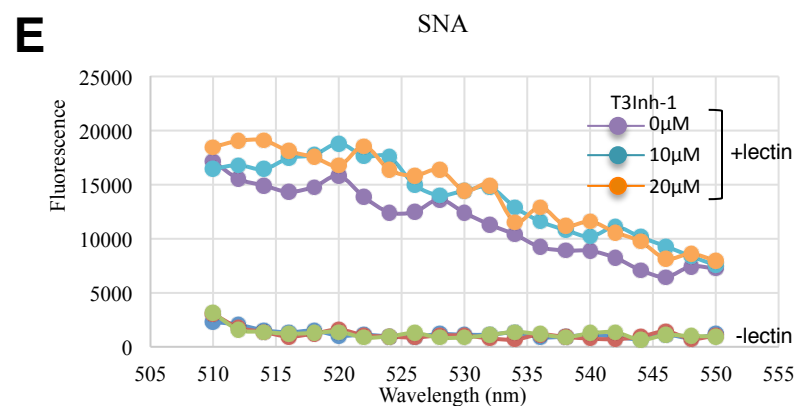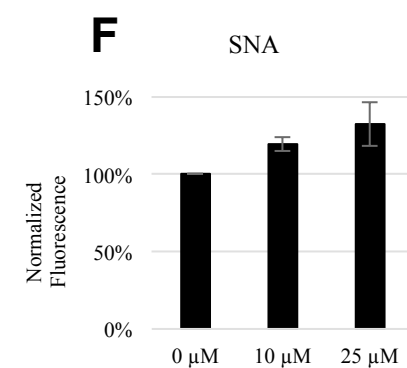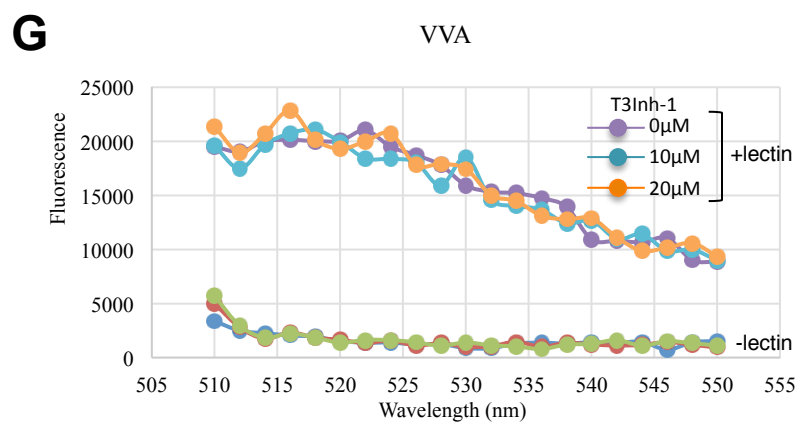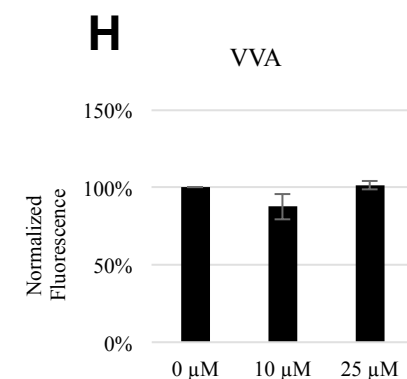

Supplement: supp [file elife_poa_e24051_Figure_1_Figure_Supplement_2.pdf › elife_poa_e24051_Figure_1_Figure_Supplement_2.pdf]

## Fig1-figure supplement 3

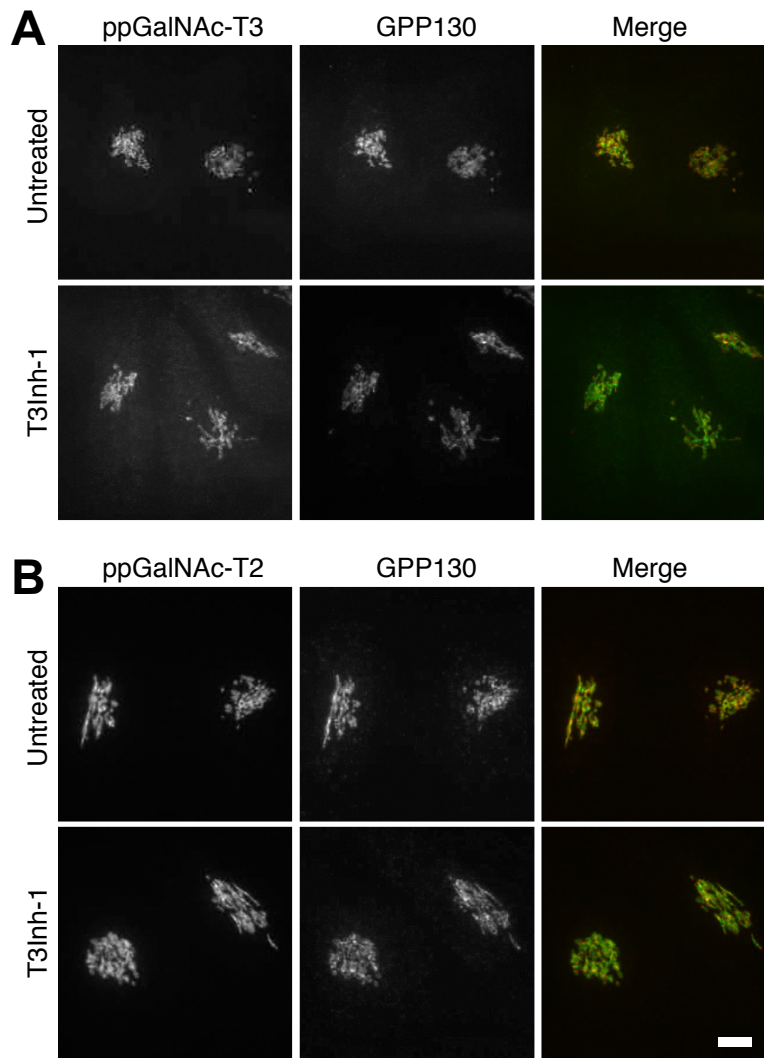

Supplement: supp [file elife_poa_e24051_Figure_1_Supplement_3.pdf › elife_poa_e24051_Figure_1_Supplement_3.pdf]

**Fig3-figure supplement 1**

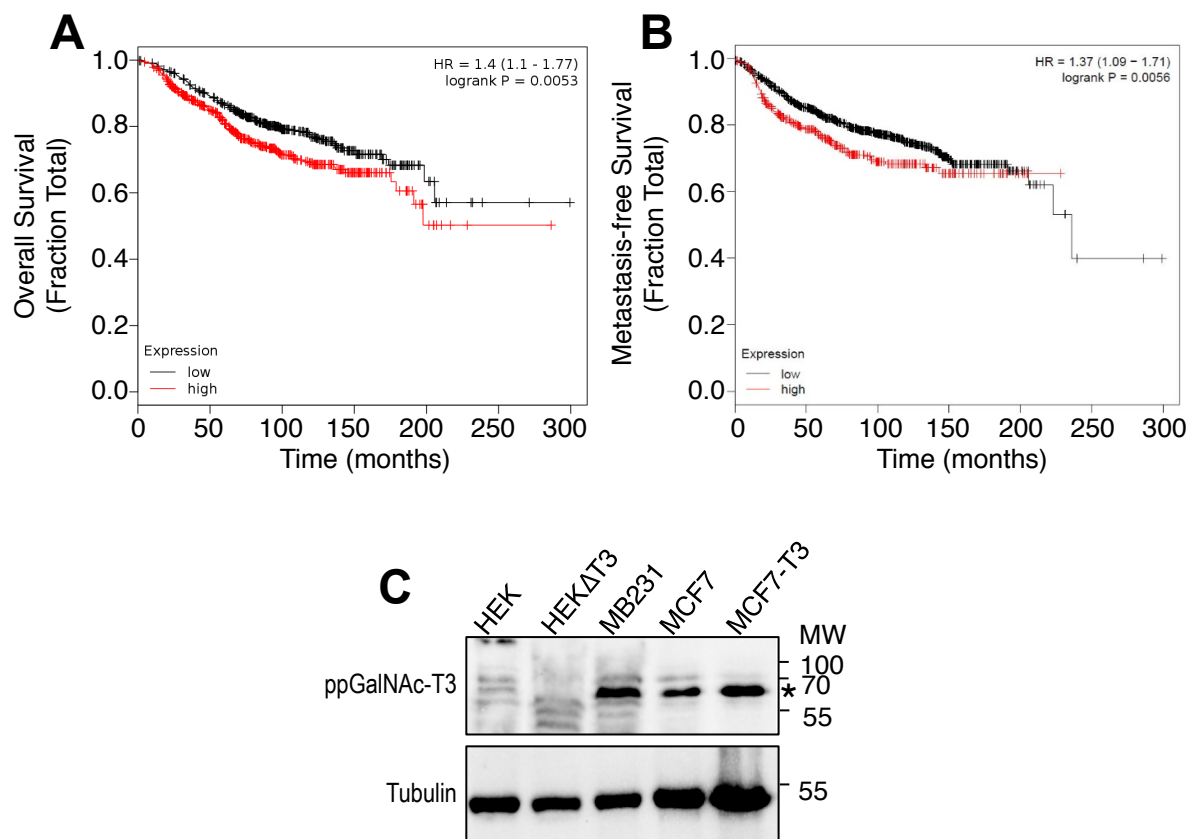

Supplement: supp [file elife_poa_e24051_Figure_3_Supplement_1.pdf › elife_poa_e24051_Figure_3_Supplement_1.pdf]

**Fig4-figure supplement 1**

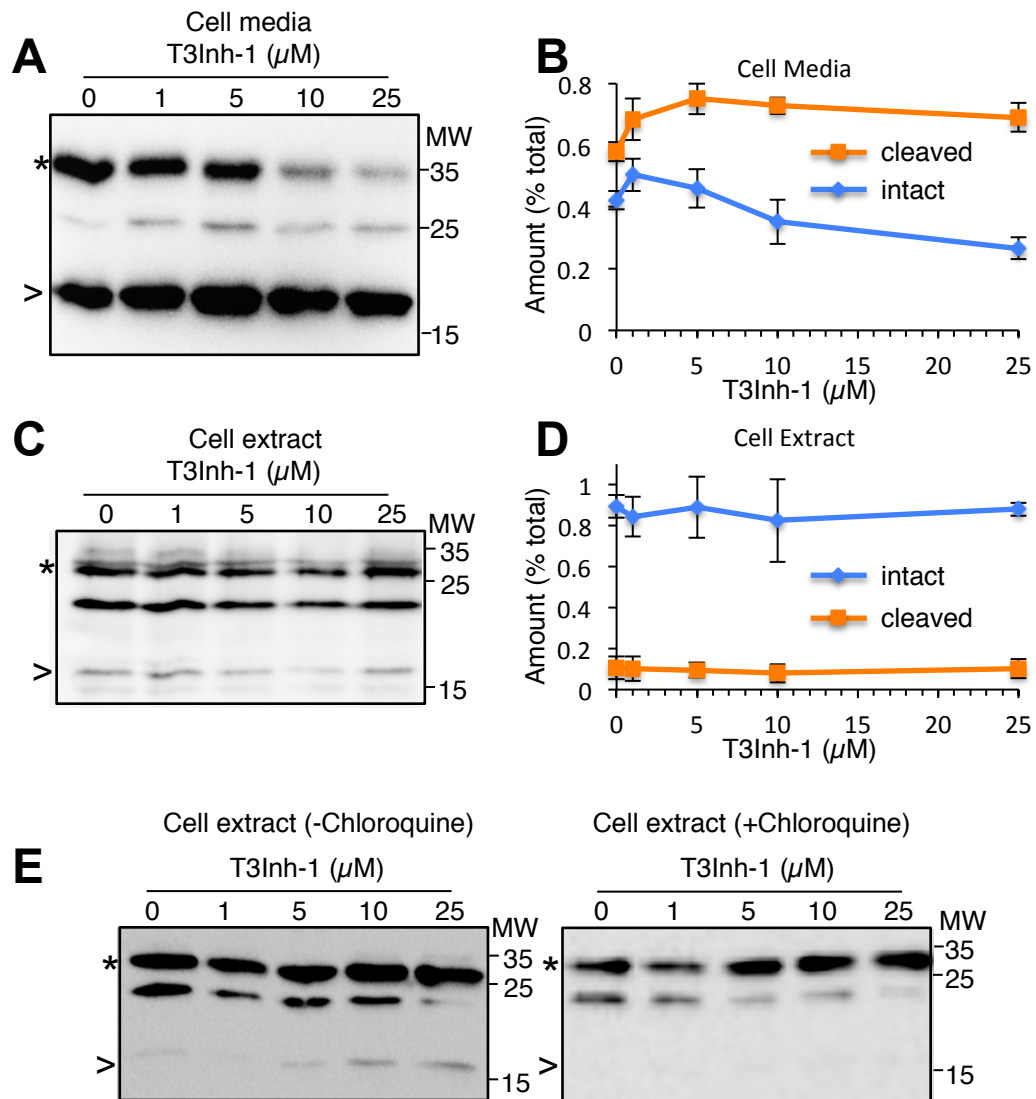

Supplement: supp [file elife_poa_e24051_Figure_4_Figure_Supplement_1.pdf › elife_poa_e24051_Figure_4_Figure_Supplement_1.pdf]
